# Supplementary material for: Transcriptome Profiling Insights the Feature of Sex Reversal Induced by High Temperature in Tongue Sole Cynoglossus semilaevis
Source: Front Genet. 2019 May 29;10:522. doi: 10.3389/fgene.2019.00522 (PMC6548826; doi:10.3389/fgene.2019.00522)
Supplement: TABLE S2 — GO terms in biological process, cellular component, and molecular function levels. [file Table_2.XLSX]

## Sheet: FOvsMT
Category	Term	Count	%	PValue	Genes	List Total	Pop Hits	Pop Total	Fold Enrichment	Bonferroni	Benjamini	FDR
GOTERM_BP_FAT	GO:0022610~biological adhesion	231	5.1528	1.6885e-06	O93319, Q91ZI0, Q0PMD2, Q8TDM5, P40240, Q69ZK9, O35206, O43586, P98161, O60504, Q80WM5, Q90Y50, Q9BZZ2, Q8WWI1, P43121, O54834, P56745, Q9Y5F6, Q61739, Q9JIE3, P24043, Q6PFX6, Q8IUX7, P61589, P56199, O35889, Q15063, A5A6L1, O75077, Q03062, Q13444, Q9QXH4, Q2UY09, P07942, Q3UZZ4, Q62371, P07949, Q6V0I7, Q91V88, Q13332, Q9CZ52, P55849, Q28256, Q15582, O08523, Q90953, Q08174, Q90688, Q80ZD7, O88792,…	3100	638	11157	1.3031	0.00776888	0.00776888	0.00318646
GOTERM_BP_FAT	GO:0007155~cell adhesion	231	5.1528	1.6885e-06	O93319, Q91ZI0, Q0PMD2, Q8TDM5, P40240, Q69ZK9, O35206, O43586, P98161, O60504, Q80WM5, Q90Y50, Q9BZZ2, Q8WWI1, P43121, O54834, P56745, Q9Y5F6, Q61739, Q9JIE3, P24043, Q6PFX6, Q8IUX7, P61589, P56199, O35889, Q15063, A5A6L1, O75077, Q03062, Q13444, Q9QXH4, Q2UY09, P07942, Q3UZZ4, Q62371, P07949, Q6V0I7, Q91V88, Q13332, Q9CZ52, P55849, Q28256, Q15582, O08523, Q90953, Q08174, Q90688, Q80ZD7, O88792,…	3100	638	11157	1.3031	0.00776888	0.00776888	0.00318646
GOTERM_BP_FAT	GO:0008033~tRNA processing	38	0.847647	3.18422e-06	Q9JI38, Q8NCE0, A4IHS0, Q9NXH9, Q9UJA5, A4IGH4, O02691, Q7TNK6, Q5RIV4, Q9BSV6, Q9NWX6, Q9WU56, A4QP75, Q9D7B1, Q7SYK1, Q803X1, Q80UN9, Q9BRP7, Q5XGG2, Q8WWH5, O75817, Q3SZ21, Q8C2P3, Q6GQ53, Q08C92, Q5XJ57, Q5EAR5, Q8R040, Q80UU2, Q8WW01, Q5RB79, Q9CR08, O14717, Q4KLT3, Q0P466, Q32M08, Q6DC53, Q503J2	3100	68	11157	2.01122	0.0146003	0.007327	0.00600902
GOTERM_BP_FAT	GO:0007067~mitosis	77	1.7176	1.89461e-05	Q9CPV5, Q563C3, Q12834, Q07832, Q96R06, Q8R034, Q5XG87, Q99741, Q1LY10, Q5BKN4, Q7ZW63, Q9YHB5, Q9R1K5, Q1LX51, O08773, Q8R349, Q9YHY6, A2BGR3, Q9UM13, Q86WB0, P20248, Q5XIT1, Q01986, O13067, P42695, Q503N2, Q90XC2, Q8BKT8, Q9CZJ6, Q0V967, A2BF66, B5X5N3, Q9R1X4, Q1T769, Q2TAW0, Q13257, Q96CS2, Q8WZ42, Q68EK9, Q2YDJ8, Q8NFH3, O08918, Q8NFH4, O43264, Q02224, Q7ZXP1, Q8NHV4, Q5R481, Q8BUH1, Q28ER3,…	3100	180	11157	1.53959	0.0837929	0.0287496	0.0357486
GOTERM_BP_FAT	GO:0000087~M phase of mitotic cell cycle	78	1.73991	1.93936e-05	Q9CPV5, Q563C3, Q12834, Q07832, Q96R06, Q8R034, Q5XG87, Q99741, Q1LY10, Q5BKN4, Q7ZW63, Q9YHB5, Q9R1K5, Q1LX51, O08773, Q8R349, Q9YHY6, A2BGR3, Q9UM13, Q86WB0, P20248, Q5XIT1, Q01986, O13067, P42695, Q503N2, Q90XC2, Q8K4R9, Q8BKT8, Q9CZJ6, Q0V967, A2BF66, B5X5N3, Q9R1X4, Q1T769, Q2TAW0, Q13257, Q96CS2, Q8WZ42, Q68EK9, Q2YDJ8, Q8NFH3, O08918, Q8NFH4, O43264, Q02224, Q7ZXP1, Q8NHV4, Q5R481, Q8BUH1,…	3100	183	11157	1.53401	0.0856848	0.0221461	0.0365928
GOTERM_BP_FAT	GO:0000280~nuclear division	77	1.7176	2.38927e-05	Q9CPV5, Q563C3, Q12834, Q07832, Q96R06, Q8R034, Q5XG87, Q99741, Q1LY10, Q5BKN4, Q7ZW63, Q9YHB5, Q9R1K5, Q1LX51, O08773, Q8R349, Q9YHY6, A2BGR3, Q9UM13, Q86WB0, P20248, Q5XIT1, Q01986, O13067, P42695, Q503N2, Q90XC2, Q8BKT8, Q9CZJ6, Q0V967, A2BF66, B5X5N3, Q9R1X4, Q1T769, Q2TAW0, Q13257, Q96CS2, Q8WZ42, Q68EK9, Q2YDJ8, Q8NFH3, O08918, Q8NFH4, O43264, Q02224, Q7ZXP1, Q8NHV4, Q5R481, Q8BUH1, Q28ER3,…	3100	181	11157	1.53108	0.10449	0.0218305	0.0450801
GOTERM_BP_FAT	GO:0051301~cell division	106	2.36449	2.39319e-05	Q9CPV5, Q563C3, O75351, P47794, Q12834, Q07832, Q5XG87, Q9CUU3, Q1LY10, Q9YHB5, O75410, A2BGR3, Q86WB0, Q9H3R5, O77819, P20248, Q5XIT1, O13067, Q9H0H5, P49706, Q8BKT8, Q0V967, O60583, B5X5N3, Q61879, Q9R1X4, Q1T769, P61025, O08918, O43264, P97814, Q02224, Q9JKX4, P10587, Q7ZXP1, P50995, Q8NHV4, Q9IBG0, Q2TBN3, Q5XLR4, P83877, Q5U4U4, Q53EZ4, P49116, Q071E0, Q5ZIN1, Q9DGA0, P18754, Q58EL7, Q5U3U6,…	3100	267	11157	1.42883	0.104652	0.0182551	0.0451541
GOTERM_BP_FAT	GO:0048285~organelle fission	79	1.76221	4.8082e-05	Q9CPV5, Q563C3, Q12834, Q07832, Q96R06, Q8R034, Q5XG87, Q99741, Q1LY10, Q5BKN4, Q7ZW63, Q9YHB5, Q9R1K5, Q1LX51, O08773, Q8R349, Q9YHY6, A2BGR3, Q9UM13, Q5M7X9, Q86WB0, P20248, Q5XIT1, Q01986, O13067, P42695, Q503N2, Q90XC2, Q9CZJ6, Q8BKT8, Q0V967, A2BF66, B5X5N3, Q9R1X4, Q1T769, Q2TAW0, Q13257, Q96CS2, Q8WZ42, Q68EK9, Q2YDJ8, Q8NFH3, O08918, Q8NFH4, O43264, Q02224, Q7ZXP1, Q8NHV4, Q5R481, Q8BUH1,…	3100	190	11157	1.49644	0.199162	0.03123	0.0907003
GOTERM_BP_FAT	GO:0006399~tRNA metabolic process	49	1.09302	0.000246136	P40329, P56192, Q9JI38, Q8NCE0, Q0V9S0, Q12904, A4IHS0, Q9NXH9, Q9UJA5, Q7TNK6, O02691, A4IGH4, Q5RIV4, Q9BSV6, Q5RBL1, Q9NWX6, Q8TEA8, Q9WU56, A4QP75, Q9D7B1, Q7SYK1, Q803X1, Q80UN9, Q9BRP7, Q1JPX3, Q5XGG2, Q8WWH5, O75817, Q3SZ21, Q9N0F3, Q8C2P3, Q6GQ53, Q08C92, Q9UHN1, Q5XJ57, Q5EAR5, Q8R040, Q80UU2, Q8WW01, Q6PI48, Q5RB79, Q9CR08, O14717, Q8BYL4, Q4KLT3, Q0P466, Q32M08, Q6DC53, Q503J2	3100	110	11157	1.60321	0.679234	0.132492	0.463482
GOTERM_BP_FAT	GO:0051253~negative regulation of RNA metabolic process	104	2.31988	0.000262923	P43135, P51531, Q08117, P49918, Q64318, Q60722, Q17QE2, P84023, P51532, Q8IVH2, P56545, Q2WG80, P39413, P41134, P49715, O60504, P19382, O35126, Q00577, Q8VI24, Q8NBF1, O60284, O95983, Q9QYU4, Q99728, P58463, P46527, Q1WG82, Q9R1X4, Q04887, Q7TST9, Q9Z1J1, Q03062, O88904, Q9Z2V6, Q9R0L1, P56524, Q28G71, O43439, P28749, Q13118, P79386, Q924W6, Q9QXN1, Q9NTG7, Q0P4H6, Q01826, Q92786, Q8TAQ2, A0JND4,…	3100	275	11157	1.36109	0.703171	0.126245	0.495018
GOTERM_BP_FAT	GO:0045892~negative regulation of transcription, DNA-dependent	101	2.25296	0.000436412	P43135, P51531, Q08117, P49918, Q64318, Q60722, Q17QE2, P84023, P51532, Q8IVH2, P56545, Q2WG80, P39413, P41134, P49715, O60504, P19382, O35126, Q00577, Q8VI24, Q8NBF1, O60284, O95983, Q9QYU4, P58463, P46527, Q1WG82, Q9R1X4, Q04887, Q7TST9, Q9Z1J1, Q03062, O88904, Q9Z2V6, Q9R0L1, P56524, Q28G71, O43439, P28749, Q13118, P79386, Q924W6, Q9QXN1, Q9NTG7, Q0P4H6, Q01826, Q92786, Q8TAQ2, A0JND4, P10826,…	3100	269	11157	1.35131	0.866843	0.182597	0.820384
GOTERM_BP_FAT	GO:0051172~negative regulation of nitrogen compound metabolic process	136	3.03368	0.000543323	P43135, P51531, P54254, P52701, Q08117, P49918, Q64318, Q60722, Q17QE2, P84023, O75496, Q8IVH2, P51532, P56545, Q2WG80, P39413, P41134, Q9R0G7, O60504, P49715, P19382, O35126, Q00577, Q9PTH3, Q8VI24, O60284, Q8NBF1, O95983, Q9QYU4, Q99728, Q91V33, P41970, P58463, O60315, Q9Y543, P20749, P46527, Q1WG82, Q9R1X4, Q04887, Q7TST9, Q9Z1J1, P40692, P22387, O88904, Q03062, Q9Z2V6, P56524, Q9R0L1, Q28G71,…	3100	381	11157	1.28469	0.918755	0.204041	1.02038
GOTERM_BP_FAT	GO:0045934~negative regulation of nucleobase, nucleoside, nucleotide and nucleic acid metabolic process	135	3.01138	0.000629007	P43135, P51531, P54254, P52701, Q08117, P49918, Q64318, Q60722, Q17QE2, P84023, Q8IVH2, O75496, P51532, P56545, Q2WG80, P39413, P41134, Q9R0G7, O60504, P49715, P19382, O35126, Q00577, Q9PTH3, Q8VI24, O60284, Q8NBF1, O95983, Q9QYU4, Q99728, Q91V33, P41970, P58463, O60315, Q9Y543, P20749, P46527, Q1WG82, Q9R1X4, Q04887, Q7TST9, Q9Z1J1, P40692, P22387, O88904, Q03062, Q9Z2V6, Q9R0L1, P56524, Q28G71,…	3100	379	11157	1.28198	0.945322	0.215094	1.1804
GOTERM_BP_FAT	GO:0000122~negative regulation of transcription from RNA polymerase II promoter	71	1.58376	0.00105604	P43135, P51531, Q02556, Q60665, Q08117, P49918, Q60722, Q64318, Q17QE2, P84023, Q15699, P51532, Q8IVH2, Q04724, P39413, P41134, O60504, P49715, P19382, O35126, Q14582, Q8VI24, O60284, Q8NBF1, Q9UJQ4, O95983, Q9QXT8, Q9QYU4, Q9Y6X8, P58463, Q5TM83, O88282, Q9D6N5, Q1WG82, Q9R1X4, Q9WV70, Q03014, Q8AVU4, O08954, Q03062, O88904, Q9Z2V6, Q6PBD4, Q9R0L1, P56524, Q96RI1, P28749, Q5ZM39, Q13118, O14770,…	3100	182	11157	1.40402	0.992406	0.312998	1.97424
GOTERM_BP_FAT	GO:0016481~negative regulation of transcription	122	2.72139	0.00109543	P43135, P51531, P54254, Q08117, P49918, Q64318, Q60722, Q17QE2, P84023, P51532, Q8IVH2, P56545, Q2WG80, P39413, P41134, Q9R0G7, O60504, P49715, P19382, O35126, Q00577, Q8VI24, O60284, Q8NBF1, O95983, Q9QYU4, Q91V33, P41970, P58463, O60315, Q9Y543, P20749, P46527, Q1WG82, Q9R1X4, Q04887, Q7TST9, Q9Z1J1, Q03062, O88904, Q9Z2V6, Q9R0L1, P56524, Q28G71, O43439, P28749, Q13118, P79386, Q924W6, Q9QXN1,…	3100	342	11157	1.28387	0.993671	0.303448	2.04716
GOTERM_BP_FAT	GO:0000279~M phase	95	2.11912	0.00117111	Q99PP2, P34022, Q9CPV5, Q563C3, P52701, Q12834, Q07832, Q96R06, Q8R034, Q5XG87, Q9CUU3, Q99741, Q1LY10, Q9YHB5, Q5BKN4, Q7ZW63, Q9R1K5, Q1LX51, O08773, Q8R349, Q9YHY6, A2BGR3, Q6PIF2, Q9UM13, O43663, Q86WB0, P20248, Q5XIT1, Q01986, Q8AXF4, O13067, P42695, Q503N2, Q9Y236, Q90XC2, Q8K4R9, Q9CZJ6, Q8BKT8, Q0V967, A2BF66, B5X5N3, Q9R1X4, Q1T769, Q2TAW0, Q13257, Q96CS2, Q9Y580, Q8WZ42, Q68EK9, Q61142,…	3100	257	11157	1.33038	0.99554	0.302905	2.18711
GOTERM_BP_FAT	GO:0034470~ncRNA processing	60	1.33839	0.00135324	Q9JI38, Q8NCE0, Q7TNK6, A4IGH4, Q6PBV6, Q5RIV4, Q91WM3, Q9BSV6, Q9WU56, A4QP75, Q6DRI7, Q9D7B1, Q8NI36, Q7SYK1, Q7YRA3, Q8WWH5, Q9Y3A2, O75817, Q6GQ53, Q5XJ57, Q8R040, Q80UU2, Q5RB79, Q7SY48, Q2KHT8, Q9CR08, O14717, Q9UET6, Q32M08, O35130, Q6P0I8, Q6DC53, Q503J2, Q9NXH9, A4IHS0, Q9UJA5, O02691, A0JMQ0, Q9NWX6, Q14690, Q3KRG3, Q12788, Q803X1, Q80UN9, Q9BRP7, Q5XGG2, Q6IQU6, Q3SZ21, Q8C2P3, Q08C92,…	3100	150	11157	1.43961	0.998079	0.323571	2.52315
GOTERM_BP_FAT	GO:0000278~mitotic cell cycle	99	2.20834	0.00142498	Q8UVJ6, Q9CPV5, Q563C3, Q12834, Q07832, P49918, Q5XG87, P28062, Q9EQT3, Q1LY10, Q9YHB5, P10417, A2BGR3, Q86WB0, P20248, Q5XIT1, O13067, Q91V33, Q8K4R9, Q8BKT8, Q0V967, B5X5N3, P46527, Q9R1X4, Q1T769, O08918, O43264, Q9R012, Q02224, O95644, Q7ZXP1, Q8NHV4, Q9IBG0, Q2TBN3, Q5XLR4, Q53EZ4, P83877, Q8AYC9, Q071E0, Q5ZIN1, Q9DGA0, P18754, Q5U3U6, Q58EL7, P49025, Q29RT4, Q6DBR4, Q6DRJ7, Q96R06, Q8R034,…	3100	271	11157	1.31478	0.998621	0.321216	2.65523
GOTERM_BP_FAT	GO:0022402~cell cycle process	141	3.14522	0.00210586	Q8UVJ6, Q99PP2, Q9UPN3, P34022, Q9CPV5, Q563C3, P52701, Q12834, Q07832, P49918, P84023, Q5XG87, Q9CUU3, Q1LY10, P28062, Q9EQT3, Q9YHB5, P98161, P10417, A2BGR3, Q86WB0, Q28178, Q5XIT1, P20248, Q8AXF4, Q99728, O13067, Q9H0H5, Q91V33, Q9Y236, Q5EAD2, Q8K4R9, Q8BKT8, Q0V967, Q5RAZ3, P46527, B2RZ50, P39689, B5X5N3, Q61879, Q9R1X4, Q1T769, Q9Y580, Q61142, P40692, O08918, O43264, A5D8S0, Q02224, P10587,…	3100	409	11157	1.24074	0.999941	0.417809	3.90023
GOTERM_BP_FAT	GO:0042325~regulation of phosphorylation	112	2.49833	0.00226349	Q9ESN0, P98155, Q80XF5, P54254, Q9GZP0, P49918, Q08462, P49796, O18734, Q99683, Q90X67, Q8K3F3, Q9R0G7, P06213, P22694, P10417, P59046, Q6Q0C0, Q28178, Q9Y6T7, Q5UBV8, Q9UGJ0, Q99728, P22413, P49706, P04233, P56199, Q8VE18, A1A5H8, O60315, P46662, Q3UW53, Q08DY9, O60583, P39689, P46527, P98135, Q5EG71, Q801G2, O35716, Q9N0J9, Q9UPT6, P22387, Q9H422, Q04594, Q02224, Q58A65, P31424, P28749, P22770,…	3100	316	11157	1.27561	0.999972	0.423564	4.18631
GOTERM_BP_FAT	GO:0030035~microspike assembly	13	0.289984	0.00251583	Q765P7, Q6ZV73, Q8R1S4, Q5EAD0, Q5R5T1, Q9UQB8, A1YB07, Q9DBJ3, Q8CFN2, Q61739, Q1LWE6, Q6ZNL6, O88387	3100	20	11157	2.33937	0.999991	0.441088	4.64259
GOTERM_BP_FAT	GO:0007049~cell cycle	200	4.4613	0.00328037	P34022, Q563C3, O75351, P47794, Q07832, O75496, Q9CUU3, Q9EQT3, P28062, Q9YHB5, P98161, Q6NX31, Q9WTY9, Q86WB0, Q5XIT1, Q8AXF4, Q5FWF5, Q5REL2, Q8NFT6, Q8K4R9, Q8BKT8, Q0V967, Q5RAZ3, P39689, P46527, Q61879, Q9D0N7, Q9R1X4, Q812A5, Q7TMI3, Q9Y580, O08918, O43264, O95644, Q7ZXP1, Q8NHV4, Q9IBG0, Q5XLR4, P83877, O88898, Q9QXV3, Q5SPR8, O75771, Q6GM07, Q8IXT1, Q95LD9, Q60665, Q99741, Q04721, Q658P3,…	3100	608	11157	1.18389	1	0.514566	6.01249
GOTERM_BP_FAT	GO:0010558~negative regulation of macromolecule biosynthetic process	137	3.05599	0.00353299	P43135, P51531, P54254, Q9HCP6, Q08117, P49918, Q64318, Q60722, Q17QE2, P84023, O75496, P51532, Q8IVH2, P56545, Q2WG80, P39413, P41134, Q9R0G7, O60504, P49715, P19382, P59046, O35126, Q00577, Q9PTH3, Q8VI24, O60284, Q8NBF1, O95983, Q9QYU4, P27093, P22413, Q91V33, P41970, P58463, O60315, Q9Y543, P20749, P46527, Q1WG82, Q9R1X4, Q04887, Q7TST9, Q9Z1J1, O88904, Q03062, Q9Z2V6, Q9JKX4, P56524, Q9R0L1,…	3100	401	11157	1.22959	1	0.524353	6.46101
GOTERM_BP_FAT	GO:0019220~regulation of phosphate metabolic process	115	2.56525	0.00372738	Q9ESN0, P98155, Q80XF5, P54254, Q9GZP0, P49918, Q08462, P49796, O18734, Q99683, Q90X67, Q8K3F3, Q9R0G7, P06213, P22694, P10417, P59046, Q6Q0C0, Q28178, Q9Y6T7, Q5UBV8, Q9UGJ0, Q99728, P22413, P49706, P11845, P04233, P56199, Q8VE18, A1A5H8, O60315, P46662, Q3UW53, Q08DY9, O60583, P39689, P46527, P98135, Q5EG71, Q801G2, O35716, Q9N0J9, Q9UPT6, P22387, Q9H422, Q04594, Q02224, Q58A65, P31424, P28749,…	3100	330	11157	1.25421	1	0.527611	6.80477
GOTERM_BP_FAT	GO:0051174~regulation of phosphorus metabolic process	115	2.56525	0.00372738	Q9ESN0, P98155, Q80XF5, P54254, Q9GZP0, P49918, Q08462, P49796, O18734, Q99683, Q90X67, Q8K3F3, Q9R0G7, P06213, P22694, P10417, P59046, Q6Q0C0, Q28178, Q9Y6T7, Q5UBV8, Q9UGJ0, Q99728, P22413, P49706, P11845, P04233, P56199, Q8VE18, A1A5H8, O60315, P46662, Q3UW53, Q08DY9, O60583, P39689, P46527, P98135, Q5EG71, Q801G2, O35716, Q9N0J9, Q9UPT6, P22387, Q9H422, Q04594, Q02224, Q58A65, P31424, P28749,…	3100	330	11157	1.25421	1	0.527611	6.80477
GOTERM_BP_FAT	GO:0030198~extracellular matrix organization	40	0.89226	0.00432278	Q95LI2, P19336, P20909, P20908, Q62009, O94769, P26009, Q3U962, P17931, Q99715, Q06335, P51532, P51693, P10587, Q9WTK5, P17785, O00300, A3KN33, A6QLD2, P08037, P34152, Q91V88, O95980, P14543, Q99K41, A6QLN9, Q8BJ66, Q15582, P13731, O88207, P79331, Q61245, Q8TDX6, Q07936, Q9H4F8, P12107, Q15063, P20749, P16924, A5A6L1	3100	96	11157	1.4996	1	0.565587	7.85027
GOTERM_BP_FAT	GO:0046847~filopodium assembly	12	0.267678	0.00556861	Q765P7, Q6ZV73, Q8R1S4, Q5EAD0, Q5R5T1, A1YB07, Q9UQB8, Q9DBJ3, Q8CFN2, Q61739, Q1LWE6, Q6ZNL6	3100	19	11157	2.27307	1	0.643611	10.0021
GOTERM_BP_FAT	GO:0043549~regulation of kinase activity	85	1.89605	0.00628974	Q6TMG5, P98155, O75293, Q98931, P49918, Q9R0C8, P35568, Q08462, P16039, P18614, Q5KSL6, P49796, Q90670, Q99741, Q99683, Q9R0G7, P06213, A5D992, P22694, O75460, Q6Q0C0, O94806, Q28178, Q9Y6T7, P17948, Q01986, Q5UBV8, Q9UGJ0, P49706, Q3UHD9, P04233, Q8TCT0, P56199, Q8VE18, A1A5H8, O60315, P46662, Q9PW70, P60484, Q08DY9, O60583, P46527, P39689, Q2KIX1, P98135, Q5EG71, Q801G2, Q8WZ42, Q9N0J9, Q8CFN2,…	3100	238	11157	1.28537	1	0.674022	11.2257
GOTERM_BP_FAT	GO:0031589~cell-substrate adhesion	37	0.82534	0.00646696	O54693, Q5H8C1, O94769, Q0PMD2, P26012, Q13444, Q923J1, Q9H6X2, Q5R7I1, P11835, Q9GLP0, P07942, P98161, P10417, O60504, P31146, Q91V88, Q9BZZ2, P14543, Q14112, P48059, Q62417, Q9CZ52, O54834, Q61739, P05106, Q99JW4, O08523, Q96S53, P11276, Q5M9B3, P61589, P56199, P07589, Q8JHW2, Q9ESS6, Q28295	3100	89	11157	1.49623	1	0.670416	11.5241
GOTERM_BP_FAT	GO:0034660~ncRNA metabolic process	71	1.58376	0.00671481	Q9JI38, Q8NCE0, Q12904, Q7TNK6, A4IGH4, Q6PBV6, Q5RIV4, Q91WM3, Q9BSV6, Q5RBL1, Q9WU56, A4QP75, Q6DRI7, Q9D7B1, Q8NI36, Q7SYK1, Q7YRA3, Q1JPX3, Q9Y3A2, Q8WWH5, O75817, Q9N0F3, Q6GQ53, Q9UHN1, Q5XJ57, Q8R040, Q80UU2, Q6PI48, Q5RB79, Q7SY48, Q2KHT8, Q9CR08, O14717, Q9UET6, Q8BYL4, Q32M08, O35130, Q6P0I8, Q6DC53, Q503J2, P40329, P56192, Q0V9S0, Q9NXH9, A4IHS0, Q9UJA5, O02691, A0JMQ0, Q9NWX6, Q8TEA8,…	3100	194	11157	1.31717	1	0.670915	11.9397
GOTERM_BP_FAT	GO:0031327~negative regulation of cellular biosynthetic process	138	3.0783	0.00674643	P43135, P51531, P54254, Q08117, P49918, Q64318, Q60722, Q17QE2, P84023, O75496, P51532, Q8IVH2, P56545, Q2WG80, P39413, P41134, Q9R0G7, O60504, P49715, P19382, P59046, O35126, Q00577, Q9PTH3, Q8VI24, O60284, Q8NBF1, O95983, Q9QYU4, P27093, P22413, Q91V33, P41970, P58463, O60315, Q9Y543, P20749, P46527, Q1WG82, Q9R1X4, Q04887, Q7TST9, Q9Z1J1, P22387, O88904, Q03062, Q9Z2V6, Q9JKX4, P56524, Q9R0L1,…	3100	411	11157	1.20843	1	0.659787	11.9925
GOTERM_BP_FAT	GO:0009890~negative regulation of biosynthetic process	140	3.12291	0.00700153	P43135, P51531, P54254, Q9HCP6, Q08117, P49918, Q64318, Q60722, Q17QE2, P84023, O75496, P51532, Q8IVH2, P56545, Q2WG80, P39413, P41134, Q9R0G7, O60504, P49715, P19382, P59046, O35126, Q00577, Q9PTH3, Q8VI24, O60284, Q8NBF1, O95983, Q9QYU4, P27093, P22413, Q91V33, P41970, P58463, O60315, Q9Y543, P20749, P46527, Q1WG82, Q9R1X4, Q04887, Q7TST9, Q9Z1J1, P22387, O88904, Q03062, Q9Z2V6, Q9JKX4, P56524,…	3100	418	11157	1.20542	1	0.661013	12.4181
GOTERM_BP_FAT	GO:0006662~glycerol ether metabolic process	18	0.401517	0.00703187	Q6DG38, P11602, P04114, P00435, P70500, Q19KA1, Q5KSL6, P55157, A3KGT9, P05153, Q8TCU4, P40189, P39823, Q95108, P0C548, Q06000, O88813, Q8WTS1	3100	35	11157	1.85093	1	0.650569	12.4686
GOTERM_BP_FAT	GO:0018904~organic ether metabolic process	18	0.401517	0.00703187	Q6DG38, P11602, P04114, P00435, P70500, Q19KA1, Q5KSL6, P55157, A3KGT9, P05153, Q8TCU4, P40189, P39823, Q95108, P0C548, Q06000, O88813, Q8WTS1	3100	35	11157	1.85093	1	0.650569	12.4686
GOTERM_BP_FAT	GO:0007271~synaptic transmission, cholinergic	7	0.156145	0.00746016	P09482, Q9JMD7, Q8BGY9, Q9GZV3, P29274, P22770, P17787	3100	8	11157	3.14915	1	0.660698	13.1784
GOTERM_BP_FAT	GO:0006917~induction of apoptosis	65	1.44992	0.00762965	O88470, Q9I8I2, P52701, Q5ZI27, P84023, Q9BXK5, Q04721, Q99683, O43293, P53355, Q9WTY1, Q9Y3A2, Q9C000, P55212, O75460, Q9GM70, O15519, P00519, Q9UHR5, Q9CQW7, Q92736, P56380, Q9Y239, Q68FU1, P21981, Q13009, O15068, Q62635, P20749, P60484, Q08DY9, P46527, Q9WTZ1, Q5U4C9, Q4JF29, O42204, P40692, Q3T013, P29274, Q9NZN5, O54842, O88904, P51398, Q8VDF3, Q96KQ4, Q13118, Q9NS68, P00435, P29452, Q9H2X6,…	3100	176	11157	1.32919	1	0.657682	13.4577
GOTERM_BP_FAT	GO:0022403~cell cycle phase	109	2.43141	0.00827304	Q99PP2, P34022, Q9CPV5, Q563C3, P52701, Q12834, Q07832, P49918, Q5XG87, Q9CUU3, Q1LY10, Q9EQT3, Q9YHB5, P10417, A2BGR3, Q86WB0, P20248, Q5XIT1, Q8AXF4, O13067, Q91V33, Q9Y236, Q8K4R9, Q8BKT8, Q0V967, B5X5N3, P46527, Q9R1X4, Q1T769, Q9Y580, Q61142, P40692, O08918, O43264, Q02224, O95644, Q7ZXP1, Q8NHV4, Q9IBG0, Q2TBN3, Q3HNG7, Q5XLR4, P83877, Q53EZ4, Q8AYC9, Q071E0, Q5ZIN1, Q9DGA0, P18754, O43502,…	3100	318	11157	1.23363	1	0.676512	14.5105
GOTERM_BP_FAT	GO:0033674~positive regulation of kinase activity	61	1.3607	0.00827599	Q6TMG5, P98155, O75293, Q98931, Q9R0C8, P35568, P18614, P16039, Q08462, Q5KSL6, Q90670, Q99683, Q9R0G7, P06213, P22694, O75460, Q6Q0C0, O94806, Q28178, P17948, Q9Y6T7, Q01986, Q5UBV8, Q9UGJ0, P49706, P04233, Q3UHD9, Q8TCT0, P56199, O60315, Q9PW70, Q2KIX1, Q5EG71, P98135, Q801G2, Q9N0J9, Q8CFN2, Q9UPT6, P22387, P29274, Q04594, Q8TEW0, Q02224, Q58A65, P31424, Q9P1T7, P22770, O88387, Q49MI3, P31321,…	3100	164	11157	1.33866	1	0.666042	14.5153
GOTERM_BP_FAT	GO:0012502~induction of programmed cell death	65	1.44992	0.00877529	O88470, Q9I8I2, P52701, Q5ZI27, P84023, Q9BXK5, Q04721, Q99683, O43293, P53355, Q9WTY1, Q9Y3A2, Q9C000, P55212, O75460, Q9GM70, O15519, P00519, Q9UHR5, Q9CQW7, Q92736, P56380, Q9Y239, Q68FU1, P21981, Q13009, O15068, Q62635, P20749, P60484, Q08DY9, P46527, Q9WTZ1, Q5U4C9, Q4JF29, O42204, P40692, Q3T013, P29274, Q9NZN5, O54842, O88904, P51398, Q8VDF3, Q96KQ4, Q13118, Q9NS68, P00435, P29452, Q9H2X6,…	3100	177	11157	1.32168	1	0.677253	15.3239
GOTERM_BP_FAT	GO:0010629~negative regulation of gene expression	127	2.83292	0.00909881	P43135, P51531, P54254, Q08117, P49918, Q64318, Q60722, Q17QE2, P84023, P51532, Q8IVH2, P56545, Q2WG80, P39413, P41134, Q9R0G7, P06213, O60504, P49715, P19382, O35126, Q00577, Q8VI24, O60284, Q8NBF1, O95983, Q9QYU4, Q91V33, P41970, P58463, O60315, Q9Y543, P20749, P46527, Q1WG82, Q9R1X4, Q04887, Q7TST9, Q9Z1J1, Q03062, O88904, Q9Z2V6, Q9R0L1, P56524, Q28G71, O43439, P28749, Q13118, P79386, Q924W6,…	3100	378	11157	1.2092	1	0.680525	15.8439
GOTERM_BP_FAT	GO:0010605~negative regulation of macromolecule metabolic process	164	3.65826	0.0100775	P43135, P51531, Q9ESN0, P54254, P52701, Q9HCP6, Q08117, Q12834, P49918, Q64318, Q60722, Q17QE2, P84023, O75496, P51532, Q8IVH2, P56545, Q2WG80, P28062, P39413, P41134, Q9R0G7, P06213, O60504, P49715, P19382, P59046, O35126, Q9PTH3, Q00577, Q8VI24, Q28178, O60284, Q8NBF1, O95983, Q9QYU4, Q99728, P27093, P22413, Q91V33, P41970, P58463, O60315, Q0V967, P20749, Q9Y543, Q3UW53, P46527, Q1WG82, Q04207,…	3100	502	11157	1.17578	1	0.708047	17.3988
GOTERM_BP_FAT	GO:0050900~leukocyte migration	15	0.334597	0.0102756	Q92608, P31146, P19320, Q0V8R5, Q12904, P26038, Q62170, Q61739, Q99698, P18614, Q14005, P56199, P11835, P05696, P08037	3100	28	11157	1.92805	1	0.70574	17.7101
GOTERM_BP_FAT	GO:0030036~actin cytoskeleton organization	75	1.67299	0.0102824	Q9NYT0, Q8BH64, O14492, O60890, Q3ZBI6, Q80U19, Q5VT25, Q0PMD2, Q3UIA2, Q6ZPF4, Q3B7N2, P07737, Q96PY5, Q923J1, Q9EQT3, P62329, Q8R1S4, Q76I76, P10417, P31146, Q9C0D6, Q8WWI1, Q4V8H8, O54834, O00560, P00519, O54931, Q96S53, Q9H0H5, P35580, Q3UHD9, P61589, O93510, O95466, Q61879, Q5RFN6, Q92608, Q92747, Q812A5, P26990, Q8WZ42, Q92177, Q13643, Q8CFN2, A5D7J5, P56945, Q6ZV73, P10587, O08808, Q9H6X2,…	3100	210	11157	1.28537	1	0.696844	17.7208
GOTERM_BP_FAT	GO:0030155~regulation of cell adhesion	39	0.869953	0.0116143	Q95LI2, P19336, Q16787, O94769, Q9R0C8, Q04594, Q9QXY2, P27986, Q9I8W5, P33150, Q00534, A3KN33, Q5ZM39, Q08DN7, P50281, P10417, Q75N03, Q68FP1, Q2KI80, Q9Y219, Q91V88, P14543, Q99K41, Q28178, P42232, Q16363, Q61739, Q15582, Q01986, P24043, O08967, P21981, O43854, P61589, P06396, Q9H4F8, P60484, A5A6L1, Q96BS2	3100	98	11157	1.43227	1	0.731823	19.7854
GOTERM_BP_FAT	GO:0007010~cytoskeleton organization	124	2.766	0.0118522	Q8UVJ6, Q9UPN3, Q9NYT0, P34022, O60890, Q5VT25, Q3UIA2, Q0PMD2, Q6ZPF4, Q3B7N2, Q96PY5, P07737, Q9EQT3, Q76I76, P10417, P34152, Q9C0D6, P31146, O75366, Q969V4, Q8WWI1, O54834, Q4V8H8, O00560, O76050, Q9H0H5, P61589, O93510, Q8BKT8, O95466, Q61879, Q5RFN6, Q92608, Q812A5, P26990, P82347, P40692, Q92177, Q13643, Q8VHJ5, O43264, A5D8S0, P10587, O14639, Q9CYT6, P07949, Q2TBN3, O15344, Q9ULJ8, P08551,…	3100	371	11157	1.20291	1	0.730515	20.149
GOTERM_BP_FAT	GO:0051338~regulation of transferase activity	85	1.89605	0.0126942	Q6TMG5, P98155, O75293, Q98931, P49918, Q9R0C8, P35568, Q08462, P16039, P18614, Q5KSL6, P49796, Q90670, Q99741, Q99683, Q9R0G7, P06213, A5D992, P22694, O75460, Q6Q0C0, O94806, Q28178, Q9Y6T7, P17948, Q01986, Q5UBV8, Q9UGJ0, P49706, Q3UHD9, P04233, Q8TCT0, P56199, Q8VE18, A1A5H8, O60315, P46662, Q9PW70, P60484, Q08DY9, O60583, P46527, P39689, Q2KIX1, P98135, Q5EG71, Q801G2, Q8WZ42, Q9N0J9, Q8CFN2,…	3100	244	11157	1.25376	1	0.746482	21.4233
GOTERM_BP_FAT	GO:0006638~neutral lipid metabolic process	17	0.37921	0.0127076	Q6DG38, P11602, P04114, P00435, P70500, Q19KA1, Q5KSL6, P55157, A3KGT9, P05153, Q8TCU4, P39823, P0C548, P40189, Q06000, O88813, Q8WTS1	3100	34	11157	1.79952	1	0.738824	21.4435
GOTERM_BP_FAT	GO:0006639~acylglycerol metabolic process	17	0.37921	0.0127076	Q6DG38, P11602, P04114, P00435, P70500, Q19KA1, Q5KSL6, P55157, A3KGT9, P05153, Q8TCU4, P39823, P0C548, P40189, Q06000, O88813, Q8WTS1	3100	34	11157	1.79952	1	0.738824	21.4435
GOTERM_BP_FAT	GO:0030029~actin filament-based process	78	1.73991	0.0136284	Q9NYT0, Q8BH64, O14492, Q29122, O60890, Q3ZBI6, Q80U19, Q5VT25, Q0PMD2, Q3UIA2, Q6ZPF4, Q3B7N2, Q9Y4I1, P07737, Q96PY5, Q923J1, Q9EQT3, P62329, Q8R1S4, Q76I76, Q8VHX6, P10417, P31146, Q9C0D6, Q8WWI1, Q4V8H8, O54834, O00560, P00519, O54931, Q96S53, Q9H0H5, P35580, Q3UHD9, P61589, O93510, O95466, Q61879, Q5RFN6, Q92608, Q92747, Q812A5, P26990, Q8WZ42, Q92177, Q13643, Q8CFN2, A5D7J5, P56945, Q6ZV73,…	3100	222	11157	1.26452	1	0.755491	22.8147
GOTERM_BP_FAT	GO:0007498~mesoderm development	28	0.624582	0.014356	Q9UPN3, Q90270, Q90275, Q7TST9, Q9Z1J1, P79295, P84023, Q9UKT9, P79728, Q90670, P23359, O00167, O57460, Q13873, Q9QXN1, Q5EBF6, Q6F2E7, P79944, O88898, P00514, Q5BL72, Q5TM83, Q8IMA8, P46662, Q9Z0S2, Q8JHF4, Q7ZTU9, Q673G8	3100	66	11157	1.52686	1	0.765893	23.8821
GOTERM_BP_FAT	GO:0051347~positive regulation of transferase activity	61	1.3607	0.0144189	Q6TMG5, P98155, O75293, Q98931, Q9R0C8, P35568, P18614, P16039, Q08462, Q5KSL6, Q90670, Q99683, Q9R0G7, P06213, P22694, O75460, Q6Q0C0, O94806, Q28178, P17948, Q9Y6T7, Q01986, Q5UBV8, Q9UGJ0, P49706, P04233, Q3UHD9, Q8TCT0, P56199, O60315, Q9PW70, Q2KIX1, Q5EG71, P98135, Q801G2, Q9N0J9, Q8CFN2, Q9UPT6, P22387, P29274, Q04594, Q8TEW0, Q02224, Q58A65, P31424, Q9P1T7, P22770, O88387, Q49MI3, P31321,…	3100	168	11157	1.30679	1	0.760058	23.9738
GOTERM_BP_FAT	GO:0033043~regulation of organelle organization	54	1.20455	0.0147232	Q9UPN3, Q6TS35, P34022, Q01082, Q563C3, Q8N3V7, P27816, Q5R4B6, P16039, Q8BX02, P62329, Q62261, P06213, O60504, P31146, Q9UM13, O75366, Q9JMC1, Q9UBC3, P61589, O93510, Q0V967, P46527, B5X5N3, P98135, Q5EG71, Q90ZE2, P20929, Q92747, Q9WV70, P26990, Q13257, Q8CFN2, Q63273, Q02224, P07992, Q68FP1, Q6AYC4, O15344, Q92786, Q03001, O15143, P51955, P18754, O88995, Q9Z2D6, Q9H254, O95271, P06396, Q58EL7,…	3100	146	11157	1.33115	1	0.760053	24.4155
GOTERM_BP_FAT	GO:0048634~regulation of muscle development	15	0.334597	0.0148716	Q9NPI5, O42222, Q9QXN1, Q5PPM5, Q6AZB0, Q8AVU4, Q7TST9, Q8IZQ8, Q6IRB2, P84023, Q9Z2V6, Q6PBD4, P56524, Q9NQ29, P10417	3100	29	11157	1.86157	1	0.756442	24.63
GOTERM_BP_FAT	GO:0048332~mesoderm morphogenesis	20	0.44613	0.015287	Q9QXN1, Q9UPN3, Q5EBF6, P79944, Q90275, Q9Z1J1, Q7TST9, P84023, P00514, Q5BL72, P79728, Q5TM83, Q8IMA8, P23359, O00167, O57460, P46662, Q13873, Q8JHF4, Q673G8	3100	43	11157	1.67397	1	0.759039	25.2276
GOTERM_BP_FAT	GO:0045859~regulation of protein kinase activity	79	1.76221	0.0166325	Q6TMG5, P98155, O75293, Q98931, P49918, Q08462, P16039, P18614, Q5KSL6, P49796, Q90670, Q99741, Q99683, Q9R0G7, P06213, A5D992, P22694, O75460, Q6Q0C0, O94806, Q28178, P17948, Q9Y6T7, Q01986, Q5UBV8, Q9UGJ0, P49706, Q3UHD9, P04233, Q8TCT0, P56199, Q8VE18, A1A5H8, O60315, P46662, Q9PW70, P60484, Q08DY9, O60583, P39689, P46527, Q2KIX1, P98135, Q5EG71, Q801G2, Q8WZ42, Q9N0J9, Q9UPT6, P22387, P29274,…	3100	227	11157	1.25253	1	0.781081	27.1323
GOTERM_BP_FAT	GO:0051056~regulation of small GTPase mediated signal transduction	86	1.91836	0.017069	Q8N1W1, Q8TEU7, P46940, Q8BPQ7, Q8IV61, O14492, Q12774, Q2PFD7, Q9R0C8, Q9NZL6, Q96PX9, Q8C8N2, O60292, O97902, Q99K28, P27987, Q04721, P11274, Q03385, A5PF44, Q8R0S2, Q08DN7, A2AAJ9, Q8TDY4, A2AWA9, Q8R2V5, Q66T02, Q01986, Q9ULL1, O08967, Q5VWQ8, Q3UHD9, Q5ZK62, Q13009, O15068, Q9P2F8, Q80XC3, Q8IW93, Q1LUA6, Q96DR7, A3KGB4, Q5R5M3, P26990, Q8IV04, Q2TA45, Q8WZ42, Q5DU25, Q76M68, Q9NU19, Q14161,…	3100	250	11157	1.23807	1	0.783308	27.7403
GOTERM_BP_FAT	GO:0046578~regulation of Ras protein signal transduction	72	1.60607	0.0178972	Q8N1W1, Q8BPQ7, O14492, Q12774, Q2PFD7, Q9R0C8, Q96PX9, Q8C8N2, O97902, Q99K28, P27987, Q04721, P11274, Q8R0S2, Q08DN7, A2AAJ9, Q8TDY4, A2AWA9, Q8R2V5, Q66T02, Q01986, Q9ULL1, O08967, Q5ZK62, Q3UHD9, Q13009, O15068, Q80XC3, Q8IW93, Q96DR7, Q1LUA6, A3KGB4, Q5R5M3, P26990, Q8IV04, Q2TA45, Q5DU25, Q8WZ42, Q9NU19, Q76M68, Q14161, Q86VW2, Q5F361, Q9NZN5, P58802, Q6ZV73, Q5VT97, Q91VS8, Q6ZR37, Q70Z35,…	3100	205	11157	1.26405	1	0.792761	28.8806
GOTERM_BP_FAT	GO:0030317~sperm motility	6	0.133839	0.0205266	O95995, P04114, Q9JLI7, O76050, Q499U4, P22770	3100	7	11157	3.08488	1	0.830356	32.3893
GOTERM_BP_FAT	GO:0045860~positive regulation of protein kinase activity	56	1.24916	0.02114	Q6TMG5, P98155, O75293, Q98931, P18614, P16039, Q08462, Q5KSL6, Q90670, Q99683, Q9R0G7, P06213, P22694, O75460, O94806, Q6Q0C0, Q28178, P17948, Q9Y6T7, Q5UBV8, Q01986, Q9UGJ0, P49706, P04233, Q3UHD9, Q8TCT0, P56199, O60315, Q9PW70, Q2KIX1, Q5EG71, P98135, Q801G2, Q9N0J9, Q9UPT6, P22387, P29274, Q04594, Q8TEW0, Q02224, Q58A65, P31424, Q9P1T7, O88387, P22770, Q49MI3, P31321, Q90999, Q12933, O43306,…	3100	155	11157	1.3003	1	0.833774	33.1839
GOTERM_BP_FAT	GO:0008284~positive regulation of cell proliferation	85	1.89605	0.0215455	Q9Y275, Q9JJN1, Q02111, O95838, O15520, P35568, Q8IZQ8, Q5RC74, Q7TSZ8, P16039, Q6P1E1, Q5XNR9, Q8JG38, O57535, P33150, P32301, Q00534, P06213, P08037, P10417, A0JPN1, P28799, P31146, Q3SWY2, Q00577, Q68CZ2, P17948, P20248, P18625, P17787, O76093, P21981, P58463, Q5TM83, P41778, O00311, Q9HBH1, P46527, P39689, P43432, O89101, P98135, Q5EG71, P49767, Q53H80, Q4JF29, P17251, P08842, Q9N0J9, Q7TST9,…	3100	249	11157	1.22859	1	0.834129	33.7044
GOTERM_BP_FAT	GO:0050863~regulation of T cell activation	27	0.602275	0.021937	Q9Y275, Q02111, Q64318, P29274, P58801, P27987, P00491, Q95118, Q3TTA7, Q5ZM39, Q5ZPR3, A0JPN1, P31146, P19320, P23492, Q90999, Q2TBA3, P42232, Q12933, P04233, Q62947, Q3U1F9, Q8CIS0, P40189, Q92956, Q08DY9, P43432	3100	65	11157	1.49498	1	0.83428	34.2032
GOTERM_BP_FAT	GO:0051129~negative regulation of cellular component organization	40	0.89226	0.0226615	Q9WV70, Q6TS35, Q13257, Q01082, P59644, P27816, Q61644, Q5R4B6, Q8CFN2, P16039, Q8BX02, Q02224, P62329, Q62261, Q99JB8, P07992, P50281, P34152, Q68FP1, Q6AYC4, P31146, O15344, Q9JMC1, O75366, O75385, Q9Z2D6, Q9H254, Q9UBC3, P54763, P61589, P06396, O95631, P53804, P49025, O93510, Q0V967, P60484, Q13275, P15146, O15943	3100	105	11157	1.37106	1	0.83886	35.1169
GOTERM_BP_FAT	GO:0006349~genetic imprinting	5	0.111532	0.0231226	Q08705, O88509, A2AV36, Q9Z2D6, Q9UBC3	3100	5	11157	3.59903	1	0.839824	35.6922
GOTERM_BP_FAT	GO:0051252~regulation of RNA metabolic process	378	8.43185	0.0233304	P43135, O54968, P70434, Q29122, Q60722, Q9I8V2, P79145, Q8BUR3, Q8IVH2, Q9UKT9, Q9UL59, Q91677, P07737, Q9UBG7, Q91678, Q06455, P41134, P10077, Q9R0G7, Q9WTY1, O60504, Q9GKQ9, O57539, P19382, A3RK74, Q00577, Q95N78, Q8NBF1, P46937, P22934, Q5XIT1, O95983, P47239, P55198, Q9QYU4, Q9UFF9, Q02078, Q3UR85, P61589, P41778, Q0VIA1, Q08BY1, O60315, Q8CB77, Q9Y543, Q8AXV6, P46527, Q96BS2, Q04207, Q8NC51,…	3100	1248	11157	1.09009	1	0.837541	35.9498
GOTERM_BP_FAT	GO:0060326~cell chemotaxis	10	0.223065	0.0247039	Q92608, P31146, Q0V8R5, Q5EBF6, P56199, P11835, P05696, Q99698, P18614, Q14005	3100	17	11157	2.11708	1	0.849547	37.6285
GOTERM_BP_FAT	GO:0048870~cell motility	87	1.94066	0.0248415	P43135, Q8UVJ6, O35276, Q9D0K1, P04114, P20908, O60890, Q12904, Q62170, Q98931, Q9R0C8, P18614, Q8QFX6, P33150, P15151, P41134, Q9R1R0, Q9R0G7, P50281, P34152, P08037, P19382, P31146, P56677, Q68CZ2, P26038, Q8VI24, Q9Y6N7, P17948, O76050, O00560, Q66T02, P00516, Q01986, Q61739, P35580, O35375, P56199, Q8TD57, O60315, Q9HBL0, P60484, A8E0R9, Q7ZTU9, Q8JHF4, Q61879, Q92608, O95995, P49767, Q0V8R5,…	3100	257	11157	1.21835	1	0.846502	37.7944
GOTERM_BP_FAT	GO:0051674~localization of cell	87	1.94066	0.0248415	P43135, Q8UVJ6, O35276, Q9D0K1, P04114, P20908, O60890, Q12904, Q62170, Q98931, Q9R0C8, P18614, Q8QFX6, P33150, P15151, P41134, Q9R1R0, Q9R0G7, P50281, P34152, P08037, P19382, P31146, P56677, Q68CZ2, P26038, Q8VI24, Q9Y6N7, P17948, O76050, O00560, Q66T02, P00516, Q01986, Q61739, P35580, O35375, P56199, Q8TD57, O60315, Q9HBL0, P60484, A8E0R9, Q7ZTU9, Q8JHF4, Q61879, Q92608, O95995, P49767, Q0V8R5,…	3100	257	11157	1.21835	1	0.846502	37.7944
GOTERM_BP_FAT	GO:0033261~regulation of S phase	8	0.178452	0.0254766	Q01721, Q92786, Q9Y6X6, P18754, O00311, Q4V8B2, P51532, Q6DBR4	3100	12	11157	2.39935	1	0.849242	38.5544
GOTERM_BP_FAT	GO:0012501~programmed cell death	143	3.18983	0.0258393	Q9ESN2, Q8WWW0, Q6GPN6, Q12904, P59910, Q0VCL9, P84023, Q5ZM55, Q9CUU3, Q99683, Q91XC8, Q7T346, O43293, Q9WTY1, P10417, P55212, Q9GM70, Q9JLV1, O15519, P59046, Q99828, P25963, Q6Q0C0, O77819, P22934, Q5UBV8, Q9Y239, Q02078, Q13009, Q6DHU1, Q0P5M9, Q08DY9, Q9NS56, P46527, Q90ZN1, Q9WTZ1, P63306, Q4JF29, Q6AYK4, Q5TCQ9, Q9NZN5, Q9H422, P58801, P51398, Q5BKL8, Q9D9K3, Q3ZBG5, O00167, Q9NS68, Q6Y290,…	3100	444	11157	1.15915	1	0.848836	38.9847
GOTERM_BP_FAT	GO:0045785~positive regulation of cell adhesion	20	0.44613	0.0258706	Q95LI2, P19336, Q2KI80, Q91V88, P14543, Q99K41, O94769, Q28178, Q9R0C8, Q61739, O08967, P21981, O43854, P61589, P33150, Q9H4F8, Q00534, A3KN33, Q08DN7, A5A6L1	3100	45	11157	1.59957	1	0.844732	39.0216
GOTERM_BP_FAT	GO:0006355~regulation of transcription, DNA-dependent	367	8.18648	0.0259954	P43135, O54968, P70434, Q29122, Q60722, Q9I8V2, P79145, Q8BUR3, Q8IVH2, Q9UKT9, Q9UL59, Q91677, P07737, Q9UBG7, Q91678, Q06455, P41134, P10077, Q9R0G7, Q9WTY1, O60504, Q9GKQ9, O57539, P19382, A3RK74, Q00577, Q95N78, Q8NBF1, P46937, P22934, Q5XIT1, O95983, P47239, P55198, Q9QYU4, Q9UFF9, Q02078, Q3UR85, P61589, P41778, Q0VIA1, Q08BY1, O60315, Q8CB77, Q9Y543, Q8AXV6, P46527, Q04207, Q96BS2, Q08705,…	3100	1212	11157	1.08981	1	0.841714	39.1689
GOTERM_BP_FAT	GO:0030111~regulation of Wnt receptor signaling pathway	21	0.468436	0.0263223	Q8UVJ6, Q9QXN1, Q5RJ80, Q03014, Q3SZE3, O15520, Q7M760, P97401, Q6TEM9, Q9QYZ8, Q04724, Q8IMA8, Q99750, Q9UBU2, O60315, Q9P1T7, Q9R0G7, Q9QYP1, Q99966, Q8MJK1, Q06831	3100	48	11157	1.57458	1	0.841021	39.5531
GOTERM_BP_FAT	GO:0051726~regulation of cell cycle	70	1.56145	0.0264249	P34022, Q563C3, P63018, Q9IA88, O75293, P49918, Q76B58, Q09167, P84023, Q9BQA5, P16039, P51532, O75496, Q99741, Q5RHQ8, Q9R1K5, Q00534, P06213, P10417, Q9UM13, Q5RHI5, Q15013, Q9Y6X6, P20248, Q5ZJU3, P49706, Q13309, Q5TM83, B5X8M4, Q0V967, O00311, P60484, Q08DY9, O60583, Q8VCC1, P39689, P46527, Q2KIX1, P98135, Q5EG71, Q6P1W0, Q9H0Z9, Q13257, Q68EK9, Q7TST9, O08918, Q8CFN2, A0JMQ0, O43264, Q01721,…	3100	202	11157	1.24719	1	0.837827	39.6731
GOTERM_BP_FAT	GO:0042770~DNA damage response, signal transduction	23	0.513049	0.0268576	Q5U4C9, Q6P1W0, Q9H0Z9, Q9BX63, P52701, Q8AYC9, Q5RHI5, Q29122, Q9H2X6, P40692, O88898, P00519, P20248, Q9BQA5, O54842, O88904, Q03468, B5X8M4, Q8WTP8, A6H7B8, Q568D5, P20749, Q6DBR4	3100	54	11157	1.53292	1	0.838377	40.1771
GOTERM_BP_FAT	GO:0070665~positive regulation of leukocyte proliferation	16	0.356904	0.029946	P31146, P19320, Q9Y275, Q4JF29, P23492, Q02111, P42232, P58801, P17787, P00491, Q8CIS0, P40189, Q5ZM39, Q5ZPR3, P39689, P43432	3100	34	11157	1.69366	1	0.865501	43.6602
GOTERM_BP_FAT	GO:0050671~positive regulation of lymphocyte proliferation	16	0.356904	0.029946	P31146, P19320, Q9Y275, Q4JF29, P23492, Q02111, P42232, P58801, P17787, P00491, Q8CIS0, P40189, Q5ZM39, Q5ZPR3, P39689, P43432	3100	34	11157	1.69366	1	0.865501	43.6602
GOTERM_BP_FAT	GO:0032946~positive regulation of mononuclear cell proliferation	16	0.356904	0.029946	P31146, P19320, Q9Y275, Q4JF29, P23492, Q02111, P42232, P58801, P17787, P00491, Q8CIS0, P40189, Q5ZM39, Q5ZPR3, P39689, P43432	3100	34	11157	1.69366	1	0.865501	43.6602
GOTERM_BP_FAT	GO:0009451~RNA modification	18	0.401517	0.0318489	Q6GQ53, Q9JI38, Q5XJ57, A4IGH4, Q6PBV6, Q32LD4, Q9NWX6, Q9WU56, O95453, Q3SYR3, Q2KHT8, Q9UI43, Q9UET6, Q7SYK1, Q803X1, Q5XGG2, Q6DC53, Q8WWH5	3100	40	11157	1.61956	1	0.878238	45.7097
GOTERM_BP_FAT	GO:0032012~regulation of ARF protein signal transduction	18	0.401517	0.0318489	Q5R787, Q2TA45, Q5DU25, Q6IVG4, Q2PFD7, Q76M68, Q14161, Q8R2V5, Q96P47, O08967, O97902, Q99K28, Q5ZK62, Q3UHD9, Q8R0S2, Q9ESQ7, Q8TDY4, O75689	3100	40	11157	1.61956	1	0.878238	45.7097
GOTERM_BP_FAT	GO:0009913~epidermal cell differentiation	12	0.267678	0.0319928	Q16787, P15924, Q674X7, Q61187, Q92817, P97431, O88898, Q08DY9, Q01986, P51532, Q60793, P22735	3100	23	11157	1.87776	1	0.875814	45.8618
GOTERM_BP_FAT	GO:0050870~positive regulation of T cell activation	19	0.423823	0.0324589	A0JPN1, P31146, P19320, Q9Y275, P23492, Q90999, Q2TBA3, Q02111, P42232, Q12933, P58801, P04233, P00491, P27987, Q8CIS0, Q95118, P40189, Q5ZPR3, P43432	3100	43	11157	1.59027	1	0.87605	46.3516
GOTERM_BP_FAT	GO:0010564~regulation of cell cycle process	26	0.579969	0.0328789	P98135, Q5EG71, P34022, Q9H0Z9, Q13257, Q563C3, Q8CFN2, P51532, P16039, O43264, Q01721, Q02224, Q9R1K5, P06213, Q9UM13, Q92786, Q15013, P51955, O88995, P18754, Q9Y6X6, A1A4R8, Q0V967, O00311, Q4V8B2, Q6DBR4	3100	64	11157	1.46211	1	0.875912	46.7895
GOTERM_BP_FAT	GO:0050867~positive regulation of cell activation	26	0.579969	0.0328789	A0JPN1, P31146, P19320, Q9Y275, Q4JF29, P23492, Q90999, Q2TBA3, Q02111, Q28178, P42232, Q12933, P58801, O13076, P17787, P04233, P00491, P27987, Q8CIS0, Q95118, P40189, Q5ZM39, Q5ZPR3, Q4KM33, P39689, P43432	3100	64	11157	1.46211	1	0.875912	46.7895
GOTERM_BP_FAT	GO:0002696~positive regulation of leukocyte activation	25	0.557662	0.0331	A0JPN1, P31146, P19320, Q9Y275, Q4JF29, P23492, Q90999, Q2TBA3, Q02111, Q28178, P42232, Q12933, P58801, O13076, P17787, P04233, P00491, P27987, Q8CIS0, Q95118, P40189, Q5ZM39, Q5ZPR3, P39689, P43432	3100	61	11157	1.47501	1	0.874194	47.0185
GOTERM_BP_FAT	GO:0042127~regulation of cell proliferation	151	3.36828	0.0341399	P51531, Q12904, Q9JJN1, Q02111, P49918, O15520, Q64318, Q8IZQ8, P84023, P40240, P56545, O14514, O57535, P32301, P33150, P06213, P10417, P08037, P49715, P31146, Q00577, Q9PTH3, P25963, Q28178, P20248, Q9UFF9, P17787, P58463, P41778, Q5REL2, P46662, Q08DY9, Q9NS56, P46527, P39689, Q9HBH1, P43432, Q96BS2, Q5EG71, P98135, O89101, Q04887, Q4JF29, P17251, Q9N0J9, Q7TST9, P22387, P58801, O54842, O88904,…	3100	475	11157	1.14411	1	0.878901	48.0836
GOTERM_BP_FAT	GO:0045580~regulation of T cell differentiation	13	0.289984	0.0345686	A0JPN1, P04233, P27987, Q62947, P00491, P23492, Q8CIS0, Q90999, Q95118, P42232, Q5ZM39, Q64318, P58801	3100	26	11157	1.79952	1	0.878805	48.5168
GOTERM_BP_FAT	GO:0007346~regulation of mitotic cell cycle	34	0.758421	0.034859	Q5EG71, P98135, Q6P1W0, Q13257, P34022, Q9H0Z9, Q9IA88, Q68EK9, Q8CFN2, P84023, P51532, O43264, Q01721, Q02224, Q99741, Q9JKX4, P06213, P10417, Q9UM13, Q92786, Q5RHI5, P51955, Q15013, Q9Y6X6, O88995, P18754, P42232, Q96DY7, P20248, Q5ZJU3, Q5TM83, A1A4R8, Q0V967, Q4V8B2	3100	89	11157	1.37491	1	0.87768	48.8082
GOTERM_BP_FAT	GO:0044093~positive regulation of molecular function	122	2.72139	0.0363463	P98155, P52701, Q02111, Q12834, P84023, Q08462, P51532, P28062, Q99683, Q8UUY8, P32301, P16885, Q9R0G7, P06213, P22694, P10417, P59046, Q6Q0C0, Q28178, O54834, Q9Y6T7, Q5UBV8, Q9UGJ0, O13076, Q9Y239, P49706, P04233, P61589, P56199, O60315, Q9WTZ1, Q04207, P98135, Q5EG71, Q4JF29, Q801G2, O14920, Q9N0J9, P22387, Q9UPT6, P58801, Q04594, O88904, Q02224, Q58A65, P56524, P31424, P11835, Q13586, P41740,…	3100	378	11157	1.16159	1	0.885215	50.2767
GOTERM_BP_FAT	GO:0010811~positive regulation of cell-substrate adhesion	14	0.312291	0.0365826	P19336, Q95LI2, Q2KI80, Q91V88, P14543, Q99K41, O94769, Q28178, O43854, P33150, Q9H4F8, Q00534, A3KN33, A5A6L1	3100	29	11157	1.73746	1	0.883724	50.5062
GOTERM_BP_FAT	GO:0006928~cell motion	115	2.56525	0.0377983	P43135, Q8UVJ6, O35276, Q9UPN3, P04114, O60890, Q12904, Q6BEA0, P40240, Q9W7J1, P33150, P15151, P41134, Q9R0G7, P50281, P08037, P34152, Q9NYC9, P19382, P31146, Q8VI24, O00560, O76050, Q61739, P54763, P56199, O60315, Q9JKU8, A8E0R9, Q8JHF4, Q61879, Q92608, Q8MJW8, Q9JLI7, Q9UPT6, P10587, P11835, P07949, P22770, O75385, Q5EBF6, O15143, Q499U4, O95631, O14525, Q6RUV5, P05696, P58400, B3DH20, Q9I9E1,…	3100	355	11157	1.16588	1	0.88889	51.6717
GOTERM_BP_FAT	GO:0006915~apoptosis	139	3.1006	0.0380875	Q9ESN2, Q8WWW0, Q6GPN6, Q12904, P59910, Q0VCL9, P84023, Q5ZM55, Q9CUU3, Q99683, Q91XC8, Q7T346, O43293, Q9WTY1, P10417, P55212, Q9GM70, Q9JLV1, O15519, P59046, Q99828, P25963, Q6Q0C0, O77819, P22934, Q5UBV8, Q9Y239, Q02078, Q13009, Q6DHU1, Q0P5M9, Q08DY9, Q9NS56, Q90ZN1, Q9WTZ1, P63306, Q4JF29, Q6AYK4, Q5TCQ9, Q9NZN5, Q9H422, P58801, P51398, Q5BKL8, Q9D9K3, Q3ZBG5, O00167, Q9NS68, Q6Y290, Q9I9N6,…	3100	436	11157	1.1474	1	0.887788	51.9451
GOTERM_BP_FAT	GO:0008629~induction of apoptosis by intracellular signals	16	0.356904	0.0392902	Q5U4C9, P00435, P52701, Q9H2X6, P40692, O88898, P00519, Q9CQW7, O54842, O88904, Q03468, Q8WTP8, P05696, P20749, Q08DY9, Q9WTZ1	3100	35	11157	1.64527	1	0.89254	53.0663
GOTERM_BP_FAT	GO:0051251~positive regulation of lymphocyte activation	23	0.513049	0.0408803	A0JPN1, P31146, P19320, Q9Y275, Q4JF29, P23492, Q90999, Q2TBA3, Q02111, P42232, Q12933, P58801, P17787, P04233, P00491, P27987, Q8CIS0, Q95118, P40189, Q5ZM39, Q5ZPR3, P39689, P43432	3100	56	11157	1.47817	1	0.899256	54.5109
GOTERM_BP_FAT	GO:0032271~regulation of protein polymerization	19	0.423823	0.0410515	P31146, Q92747, P26990, Q01082, O75366, Q9JMC1, O15143, Q9H254, Q5R4B6, O94811, P06396, P61589, P62329, Q62261, O93510, Q6RUV5, P46527, Q68FP1, Q6AYC4	3100	44	11157	1.55413	1	0.897497	54.6638
GOTERM_BP_FAT	GO:0008630~DNA damage response, signal transduction resulting in induction of apoptosis	11	0.245371	0.0415184	Q5U4C9, O88904, Q03468, P52701, Q9H2X6, Q8WTP8, P40692, O88898, P00519, P20749, O54842	3100	21	11157	1.88521	1	0.897464	55.0786
GOTERM_BP_FAT	GO:0030031~cell projection assembly	33	0.736114	0.041648	Q765P7, O60890, Q6PGZ3, Q9UQB8, Q6DKE2, Q8CFN2, Q9R0C8, Q1LWE6, Q8TEW0, Q6ZV73, P10587, P33150, Q8R1S4, Q8TCU4, A1YB07, Q8JHI3, P12003, O88387, Q6AYC4, Q05144, Q68CZ1, Q9DBJ3, O00560, O76050, Q61739, Q64727, P35580, Q5EAD0, Q6RUV5, Q5R5T1, B3DH20, Q6ZNL6, Q61879	3100	87	11157	1.36515	1	0.895497	55.1931
GOTERM_BP_FAT	GO:0010883~regulation of lipid storage	8	0.178452	0.042178	P11602, O95477, P04114, P25963, P0C548, Q06000, P05106, Q8WTS1	3100	13	11157	2.21479	1	0.895849	55.6584
GOTERM_BP_FAT	GO:0048635~negative regulation of muscle development	8	0.178452	0.042178	Q9QXN1, O42222, Q9Z2V6, Q6PBD4, Q5PPM5, Q9NQ29, Q8AVU4, Q6IRB2	3100	13	11157	2.21479	1	0.895849	55.6584
GOTERM_BP_FAT	GO:0043550~regulation of lipid kinase activity	6	0.133839	0.0423039	Q9N0J9, Q6RUV5, P28749, Q8CFN2, Q9R0C8, P35568	3100	8	11157	2.69927	1	0.893894	55.7683
GOTERM_BP_FAT	GO:0031399~regulation of protein modification process	60	1.33839	0.0433356	Q80XF5, Q9ESN0, P59644, Q9GZP0, Q9HCP6, Q12834, P28062, Q99683, Q90X67, O95352, Q9R0G7, P06213, P10417, Q9UM13, Q9JMC1, P59046, P60901, Q5ZHY5, Q9UBC3, P00514, Q9UGJ0, P22413, P49706, Q3T0J1, Q6VVB1, O60315, Q0V967, Q3UW53, Q3MQ24, Q90ZE2, P49767, Q9WV70, Q13257, Q17QK6, Q9Z2A6, O35716, Q9N0J9, Q6KF10, Q9UPT6, Q9H422, P56524, Q5S007, Q5RB23, Q9P1T7, Q13873, O88387, P31321, Q8R1P4, Q9Z2D6, Q03468,…	3100	174	11157	1.24105	1	0.897071	56.659
GOTERM_BP_FAT	GO:0043068~positive regulation of programmed cell death	86	1.91836	0.0442562	O88470, Q9I8I2, P52701, P28562, Q5ZI27, P84023, P18614, Q9BXK5, Q04721, Q99683, O43293, P53355, P23359, Q9WTY1, P08037, Q9Y3A2, Q9C000, P55212, O75460, Q9GM70, O15519, Q8JG64, P00519, Q9UHR5, Q99728, Q92736, Q9CQW7, P56380, Q9Y239, Q68FU1, Q13309, P21981, Q13009, P61589, P56199, O15068, P35638, Q62635, P60484, P20749, Q08DY9, O08600, P46527, P39689, Q9WTZ1, Q5U4C9, Q4JF29, O42204, P40692, Q3T013,…	3100	260	11157	1.19045	1	0.8995	57.4393
GOTERM_BP_FAT	GO:0032147~activation of protein kinase activity	30	0.669195	0.0442666	Q2KIX1, Q6TMG5, O75293, P22387, P29274, Q08462, Q04594, Q8TEW0, Q5KSL6, Q90670, P31424, P06213, P22694, Q49MI3, P31321, Q90999, Q6Q0C0, O94806, Q9Y6T7, P17948, Q12933, Q5UBV8, Q6P5E8, O43306, P40145, Q8TCT0, Q03468, Q9BWT7, Q9PW70	3100	78	11157	1.38424	1	0.897014	57.448
GOTERM_BP_FAT	GO:0016202~regulation of striated muscle tissue development	12	0.267678	0.0445975	Q9NPI5, Q9QXN1, O42222, Q9Z2V6, Q6PBD4, P56524, Q9NQ29, Q6AZB0, Q7TST9, Q8IZQ8, P84023, P10417	3100	24	11157	1.79952	1	0.896265	57.7252
GOTERM_BP_FAT	GO:0040017~positive regulation of locomotion	27	0.602275	0.046772	P49767, Q812A5, Q0V8R5, A7YY44, O15520, P35568, P56945, P27986, P33150, P07942, P06213, P10417, Q75N03, P81122, P31146, Q8WUI4, Q28178, P17948, Q9W7C5, Q01986, Q14005, P61589, P40189, P05696, Q62151, P08709, P85298	3100	69	11157	1.40832	1	0.904991	59.5045
GOTERM_BP_FAT	GO:0010639~negative regulation of organelle organization	25	0.557662	0.048298	O15344, P31146, Q6TS35, Q9WV70, Q13257, Q9JMC1, Q01082, O75366, P27816, Q9Z2D6, Q9H254, Q5R4B6, Q9UBC3, P16039, Q8BX02, Q02224, P06396, P62329, O93510, Q62261, P07992, Q0V967, P15146, Q68FP1, Q6AYC4	3100	63	11157	1.42819	1	0.909906	60.7106
GOTERM_BP_FAT	GO:0006641~triglyceride metabolic process	14	0.312291	0.0485809	Q6DG38, P11602, P04114, P00435, Q19KA1, P55157, A3KGT9, P05153, Q8TCU4, P0C548, P40189, Q06000, O88813, Q8WTS1	3100	30	11157	1.67955	1	0.908931	60.9305
GOTERM_BP_FAT	GO:0030261~chromosome condensation	9	0.200758	0.049055	O13067, Q2TAW0, Q5RH01, P42695, Q9YHB5, Q8WZ42, Q9YHY6, Q6NVM0, Q5XG87	3100	16	11157	2.02446	1	0.908843	61.2962
GOTERM_BP_FAT	GO:0030595~leukocyte chemotaxis	9	0.200758	0.049055	Q92608, P31146, Q0V8R5, P56199, P11835, P05696, Q99698, P18614, Q14005	3100	16	11157	2.02446	1	0.908843	61.2962
GOTERM_CC_FAT	GO:0044420~extracellular matrix part	56	1.24916	8.54956e-06	Q8NDA2, P20909, Q4FZX7, P20908, Q5H8C1, Q3U962, Q99715, P42263, Q8JHV6, P02463, O35206, O46392, P02457, A3KN33, Q80YX1, P10039, P14543, A6QLN9, P08122, P11276, P24043, P27424, O88207, P55002, Q61245, Q9H4F8, Q16787, P25318, Q8AVH7, P27006, Q63870, A0MSJ1, Q5SZK8, P51693, Q2UY09, P17785, P07942, P97857, P51890, Q86XX4, Q9N281, Q2KI80, Q91V88, Q14112, Q03001, Q16363, O75445, A6H6E2, O93484, Q7SIB2,…	2834	117	10116	1.70848	0.00583936	0.00583936	0.0128551
GOTERM_CC_FAT	GO:0031012~extracellular matrix	132	2.94446	1.26106e-05	P32018, P21754, O46542, Q99715, P32017, Q8JHV6, P42263, P02463, P48834, O35206, Q9BXX0, P02457, Q7RTW8, Q2TNK5, Q06000, P50281, Q80WM5, A6QLN9, Q9P2N4, Q00918, P11276, P24043, P27424, P55002, Q15063, Q8TE56, Q8TE57, Q8K482, Q16787, Q8AVH7, Q24JV9, P27006, P98133, O94769, P49339, Q62894, Q2UY09, P17785, Q90X49, P07942, Q91V88, Q99542, Q15582, O08523, Q90953, P20785, P07589, O95631, Q9UNA0, Q9NZU1,…	2834	340	10116	1.38581	0.00860112	0.00430985	0.0189608
GOTERM_CC_FAT	GO:0005578~proteinaceous extracellular matrix	127	2.83292	3.01903e-05	P32018, P21754, O46542, Q99715, P32017, Q8JHV6, P02463, P48834, O35206, Q9BXX0, P02457, Q7RTW8, Q2TNK5, P50281, Q80WM5, A6QLN9, Q9P2N4, Q00918, P11276, P24043, P27424, P55002, Q15063, Q8TE56, Q8TE57, Q8K482, Q16787, Q8AVH7, Q24JV9, P27006, P98133, O94769, P49339, Q62894, Q2UY09, P17785, Q90X49, P07942, Q91V88, Q99542, Q15582, O08523, Q90953, P20785, P07589, O95631, Q9UNA0, Q9NZU1, P08253, Q07936,…	2834	330	10116	1.37372	0.0204683	0.00686985	0.0453872
GOTERM_CC_FAT	GO:0005604~basement membrane	42	0.936873	0.000108053	Q16787, Q8NDA2, Q8AVH7, P25318, Q4FZX7, P20908, P27006, Q63870, Q5H8C1, Q8JHV6, P02463, Q5SZK8, P51693, O35206, Q2UY09, P17785, P07942, P97857, A3KN33, Q86XX4, P10039, Q80YX1, Q9N281, Q2KI80, Q91V88, P14543, Q14112, A6QLN9, Q03001, Q16363, O75445, P08122, P11276, A6H6E2, P24043, Q7SIB2, O88207, P07589, O95631, Q07936, Q9H4F8, Q9HB63	2834	87	10116	1.72321	0.0713474	0.018335	0.162356
GOTERM_CC_FAT	GO:0005761~mitochondrial ribosome	19	0.423823	0.000130637	Q9NYK5, Q8K2M0, Q9NVS2, Q9Y6G3, Q2YDF6, Q9DB15, Q5BJJ8, Q9Y2R5, Q99N91, Q08DT6, Q5BJB7, P51398, Q9H0U6, Q95KE5, Q502B0, Q502C1, P0C2B8, P82911, Q9CXW2	2834	29	10116	2.33865	0.0856043	0.0177392	0.196257
GOTERM_CC_FAT	GO:0000313~organellar ribosome	19	0.423823	0.000130637	Q9NYK5, Q8K2M0, Q9NVS2, Q9Y6G3, Q2YDF6, Q9DB15, Q5BJJ8, Q9Y2R5, Q99N91, Q08DT6, Q5BJB7, P51398, Q9H0U6, Q95KE5, Q502B0, Q502C1, P0C2B8, P82911, Q9CXW2	2834	29	10116	2.33865	0.0856043	0.0177392	0.196257
GOTERM_CC_FAT	GO:0044421~extracellular region part	221	4.92973	0.00043327	P98155, P04114, P98158, O46542, O35206, Q9Y5X9, P98093, Q80WM5, P98164, Q62867, O00214, A6QLN9, Q03591, Q9P2N4, Q9UKU9, Q5R4N8, O62657, P24043, P22413, P27424, Q15063, Q96PB7, P43432, P98135, P63306, P27006, P98133, Q62894, Q2UY09, Q90X49, P17785, P07942, Q9YGD3, Q3UZZ4, Q91V88, Q99542, Q15582, O08523, Q90953, P06396, Q9BUR5, O95631, Q9UNA0, Q07936, Q9HCB6, Q13224, Q9UP79, O42222, P11602, Q8C1Q4,…	2834	650	10116	1.21363	0.256848	0.0482717	0.649526
GOTERM_CC_FAT	GO:0043232~intracellular non-membrane-bounded organelle	591	13.1831	0.000441817	P46940, P34022, Q2NL05, B2RTY4, P27816, Q8IVH2, Q9QXY2, Q9CUU3, P07737, Q9EQT3, Q3TVI8, Q02084, Q8K2B0, Q8WXH0, Q8UVC1, A5PF48, Q62733, O75366, Q6NX31, A6QLN9, Q969V4, O77819, O54834, O95983, Q5XIT1, Q568A0, P61589, P67777, Q8K4R9, O02675, Q8BKT8, Q8BJS4, Q0V967, P47904, Q7ZVR1, Q6AYK5, Q791N7, Q9Y6G3, Q9BQ67, Q2YDF6, Q2HZX7, Q8VCX6, Q13643, P19352, Q66I67, Q8VHJ5, P55859, Q26630, Q9P2B4, P51398,…	2834	1894	10116	1.11382	0.261188	0.0423228	0.662299
GOTERM_CC_FAT	GO:0043228~non-membrane-bounded organelle	591	13.1831	0.000441817	P46940, P34022, Q2NL05, B2RTY4, P27816, Q8IVH2, Q9QXY2, Q9CUU3, P07737, Q9EQT3, Q3TVI8, Q02084, Q8K2B0, Q8WXH0, Q8UVC1, A5PF48, Q62733, O75366, Q6NX31, A6QLN9, Q969V4, O77819, O54834, O95983, Q5XIT1, Q568A0, P61589, P67777, Q8K4R9, O02675, Q8BKT8, Q8BJS4, Q0V967, P47904, Q7ZVR1, Q6AYK5, Q791N7, Q9Y6G3, Q9BQ67, Q2YDF6, Q2HZX7, Q8VCX6, Q13643, P19352, Q66I67, Q8VHJ5, P55859, Q26630, Q9P2B4, P51398,…	2834	1894	10116	1.11382	0.261188	0.0423228	0.662299
GOTERM_CC_FAT	GO:0005576~extracellular region	399	8.90029	0.0040992	Q32KJ8, Q76B58, Q6UXX9, O35206, P98093, Q8IUH2, Q1JPB9, Q62867, Q9BZZ2, A6QLN9, A9JRB3, Q90935, Q8CJ69, Q6NUX0, O62657, P22413, P22411, P27424, Q8C522, Q98SV1, P01213, O89101, P63306, O75077, P27006, Q9YHV4, Q62894, Q2UY09, Q90X49, P17785, P07942, A1IGX5, Q9YGD3, P04366, Q99542, Q8K0C5, O08523, Q90952, Q90953, Q9UNA0, O95631, Q07936, Q9HCB6, Q13224, P19336, O42222, Q8C1Q4, P11602, Q01584, O89029,…	2834	1277	10116	1.1153	0.940019	0.29652	5.9897
GOTERM_CC_FAT	GO:0033279~ribosomal subunit	23	0.513049	0.00455448	Q9NVS2, Q9Y6G3, Q498Z6, Q2TBI6, Q2YDF6, Q5BJJ8, Q9Y2R5, O35680, Q4V8H8, P84100, Q99N91, P16039, Q5BJB7, Q0VFH6, P51398, Q95KE5, Q924T2, Q502B0, Q502C1, P0C2B8, Q6DGM3, P82911, Q9CXW2	2834	47	10116	1.74678	0.956148	0.293504	6.63388
GOTERM_CC_FAT	GO:0000775~chromosome, centromeric region	38	0.847647	0.00490029	Q1T769, Q13257, Q5XGL1, Q9CPV5, Q9Z0W3, Q1T765, Q1T764, Q8NFH3, Q8NFH4, Q96R06, Q28BZ7, Q08E31, O43264, Q02224, P83917, Q32LC9, Q7ZW63, Q7ZZC6, P45973, Q8AYS7, Q5R481, Q28ER3, Q5XLR4, A2BGR3, O88509, Q9H3R5, P52948, Q0IHP2, Q6DRD4, Q503N2, Q9CXH7, P67777, Q58EL7, Q9CZJ6, Q96IY1, Q96MW7, B5X5N3, Q6DRJ7	2834	90	10116	1.50713	0.965436	0.28573	7.12041
GOTERM_CC_FAT	GO:0005739~mitochondrion	310	6.91501	0.0104726	Q8R0F8, P84173, Q2TBI6, Q1LZ96, Q8BRC6, Q5IFP1, Q9XSA7, Q95KE5, O57535, Q4FZT8, Q16822, Q9N0F3, Q9NYK5, P10619, Q1RLY6, Q9UHN1, Q3ZBL5, Q8R2V5, P55198, Q7Z434, Q8IVH4, P61589, O02675, Q8WV74, Q08DY9, Q6NYZ6, O43772, Q9Y6G3, Q08CK1, Q86WA6, Q2YDF6, Q8R361, Q8TEA8, P51398, B1AR13, Q58EB4, P59480, Q9BZ23, Q6PBH5, Q9NS68, P07221, Q6Y290, Q6DGM3, Q6P825, Q9NTG7, Q498Z6, P19367, P00480, Q8BHE8, Q0MQH7,…	2834	990	10116	1.11773	0.999262	0.480868	14.6411
GOTERM_CC_FAT	GO:0001726~ruffle	30	0.669195	0.0162446	O14745, P26990, P59644, Q5U1Y1, Q29122, O14492, Q99K30, Q9UQB8, Q9JHL4, Q01406, Q9Y4I1, P56945, Q6ZV73, O57535, Q923J1, O08808, Q5ZM14, Q00534, Q9CQD1, Q9JMC1, O08967, P04631, Q5EAD0, P49025, A6H7G2, P46662, Q4KM33, Q96BS2, Q6ZNL6, Q96DR7	2834	72	10116	1.4873	0.999987	0.607379	21.8292
GOTERM_CC_FAT	GO:0000793~condensed chromosome	31	0.691501	0.0163131	Q1T769, Q9UEY8, Q9CPV5, Q13257, Q8WZ42, P40692, Q8NFH3, Q96R06, Q8NFH4, Q28BZ7, Q08E31, O43264, Q9CUU3, Q02224, Q7ZW63, Q5R481, A2BGR3, Q6PIF2, P51955, P18754, Q9H3R5, Q503N2, P42695, Q9CXH7, Q58EL7, P26584, Q8BJS4, Q96IY1, Q06609, B5X5N3, Q6DRJ7	2834	75	10116	1.4754	0.999987	0.579648	21.911
GOTERM_CC_FAT	GO:0000779~condensed chromosome, centromeric region	20	0.44613	0.0166771	Q1T769, Q9CPV5, Q13257, Q9H3R5, Q8NFH3, Q96R06, Q8NFH4, Q28BZ7, Q08E31, O43264, Q02224, Q503N2, Q9CXH7, Q7ZW63, Q58EL7, Q5R481, Q96IY1, B5X5N3, Q6DRJ7, A2BGR3	2834	43	10116	1.66024	0.99999	0.56083	22.3444
GOTERM_CC_FAT	GO:0044427~chromosomal part	82	1.82913	0.0167492	Q9CPV5, P52701, Q91431, P35244, Q96R06, P35249, Q6NVM0, Q08E31, P51532, Q9CUU3, Q32LC9, Q02084, Q7ZW63, Q7ZZC6, A2BGR3, Q6PIF2, Q62733, P30664, Q6NX31, Q00577, O88509, Q8VI24, Q9H160, Q9H3R5, O95983, Q9UBC3, Q6DRD4, P42695, Q503N2, P67777, Q8TDI0, Q9CZJ6, Q8BJS4, O15164, Q96MW7, B5X5N3, Q9NS91, Q1T769, Q6P823, Q13257, Q5XGL1, Q9Z0W3, Q1T765, Q1T764, P40692, Q8NFH3, Q8NFH4, Q28BZ7, O43264, Q02224,…	2834	235	10116	1.24553	0.999991	0.537616	22.43
GOTERM_CC_FAT	GO:0000777~condensed chromosome kinetochore	18	0.401517	0.0200412	Q1T769, Q9CPV5, Q13257, Q9H3R5, Q8NFH3, Q96R06, Q8NFH4, Q28BZ7, O43264, Q02224, Q503N2, Q7ZW63, Q58EL7, Q5R481, Q96IY1, B5X5N3, Q6DRJ7, A2BGR3	2834	38	10116	1.69082	0.999999	0.579675	26.2447
GOTERM_CC_FAT	GO:0005856~cytoskeleton	339	7.5619	0.0257379	P46940, Q8WWW0, P34022, Q2NL05, Q9BVG8, Q29122, B2RTY4, P27816, Q3B7N2, Q9QXY2, P07737, Q9EQT3, Q3TVI8, Q8UVC1, Q8WXH0, A2AJI0, O43586, A5PF48, Q8VHX6, O60504, Q8TBB0, Q9C0D5, O75366, Q969V4, O54834, O77819, Q5XIT1, A8WFU8, Q28626, P61589, P67777, Q91Z83, O93510, Q8K4R9, O02675, Q8BKT8, Q58EE9, Q0V967, P46662, Q8C1B1, Q61879, Q9UEY8, P82347, Q00587, Q2HZX7, Q13643, P19352, Q8VHJ5, Q66I67, Q28BZ7,…	2834	1107	10116	1.0931	1	0.650296	32.4354
GOTERM_CC_FAT	GO:0008305~integrin complex	14	0.312291	0.0286566	P26009, Q13797, Q61739, P05106, P18614, P26012, Q5M9B3, Q9QXH4, Q63258, Q06274, P56199, Q00651, P11835, Q9GLP0	2834	28	10116	1.78476	1	0.669277	35.4158
GOTERM_CC_FAT	GO:0070161~anchoring junction	54	1.20455	0.0373477	Q9EQT3, Q5R7I1, O55111, P28827, P34152, P08037, O60504, Q9Y446, Q3SWY2, P15924, Q90Y50, Q8BIW1, P48059, Q8WWI1, Q68CZ2, O00560, P97350, Q64727, Q61739, Q99JW4, Q9BQL6, Q04584, O35889, P46662, Q9HBL0, Q155Q3, Q16787, Q9QZQ1, Q0IIY7, Q8CGB6, P62484, Q8TEW0, Q5RKG2, Q9HBI1, A6X8Z5, A5D7J5, P56945, Q7ZXE9, P12003, Q8QFP8, Q14258, P22735, Q674X7, Q62417, Q61792, Q9JKF6, Q9DDN6, Q92817, P32507, Q14511,…	2834	152	10116	1.26812	1	0.74647	43.5802
GOTERM_CC_FAT	GO:0030055~cell-substrate junction	35	0.780727	0.0381385	Q16787, Q9UPN3, Q8CGB6, Q9HBI1, Q5RKG2, A6X8Z5, P56945, A5D7J5, Q9EQT3, Q5R7I1, Q7ZXE9, P12003, Q8QFP8, P34152, O60504, Q14258, Q9N281, Q3SWY2, Q8BIW1, Q62417, P48059, Q61792, Q03001, Q68CZ2, Q9DDN6, O00560, Q14511, Q64727, Q99JW4, Q5REN1, Q9BQL6, Q04584, Q99PD6, Q9HBL0, Q155Q3	2834	92	10116	1.35797	1	0.736	44.273
GOTERM_CC_FAT	GO:0005581~collagen	15	0.334597	0.0406933	P20909, P20908, A0MSJ1, Q99715, Q3U962, P08122, P02463, Q7SIB2, O46392, O93484, O88207, P02457, Q61245, P12107, P51890	2834	32	10116	1.67321	1	0.742089	46.4577
GOTERM_CC_FAT	GO:0005925~focal adhesion	31	0.691501	0.0407592	Q16787, Q8CGB6, Q9HBI1, Q5RKG2, A6X8Z5, P56945, A5D7J5, Q9EQT3, Q5R7I1, Q7ZXE9, P12003, Q8QFP8, P34152, Q14258, O60504, Q3SWY2, Q8BIW1, P48059, Q61792, Q68CZ2, Q9DDN6, O00560, Q14511, Q64727, Q99JW4, Q9BQL6, Q5REN1, Q04584, Q99PD6, Q9HBL0, Q155Q3	2834	80	10116	1.38319	1	0.726289	46.513
GOTERM_CC_FAT	GO:0005840~ribosome	54	1.20455	0.0419978	Q2TBI6, Q9DB15, Q5BJJ8, O35680, Q6PBR7, P16039, Q95KE5, Q503X2, Q9NYK5, Q8K2M0, A6QLN9, Q4V8H8, Q5SPH9, Q9CQ40, Q0VFH6, Q9H0U6, P82931, P47904, Q502C1, Q9NRX2, Q9CXW2, P82925, P82924, Q9Y6G3, P82929, Q2YDF6, Q9Y2R5, P84100, Q08DT6, Q5T653, P51398, P59480, P52293, Q502B0, Q2KIS2, P79386, Q6DGM3, P0C2B8, Q1LXI5, P58059, Q9NVS2, Q96S38, Q498Z6, Q8R2L5, Q9CY16, Q7ZUH5, Q99N91, Q2TBS2, Q5BJB7, Q924T2,…	2834	153	10116	1.25983	1	0.721358	47.5421
GOTERM_CC_FAT	GO:0000314~organellar small ribosomal subunit	6	0.133839	0.0437509	Q9NVS2, Q9Y6G3, Q2YDF6, Q9Y2R5, P82911, Q9CXW2	2834	8	10116	2.67713	1	0.721089	48.9672
GOTERM_CC_FAT	GO:0005763~mitochondrial small ribosomal subunit	6	0.133839	0.0437509	Q9NVS2, Q9Y6G3, Q2YDF6, Q9Y2R5, P82911, Q9CXW2	2834	8	10116	2.67713	1	0.721089	48.9672
GOTERM_CC_FAT	GO:0032432~actin filament bundle	11	0.245371	0.0437584	P35580, P97814, Q3TN34, P10587, O14492, Q62417, Q3ZBI6, O43586, Q13643, Q61879, Q04584	2834	21	10116	1.86974	1	0.706537	48.9733
GOTERM_CC_FAT	GO:0015935~small ribosomal subunit	11	0.245371	0.0437584	P51398, Q9NVS2, Q498Z6, Q9Y6G3, Q924T2, Q2YDF6, O35680, Q9Y2R5, P16039, P82911, Q9CXW2	2834	21	10116	1.86974	1	0.706537	48.9733
GOTERM_CC_FAT	GO:0005924~cell-substrate adherens junction	32	0.713808	0.0470295	Q16787, Q8CGB6, Q9HBI1, Q5RKG2, A6X8Z5, P56945, A5D7J5, Q9EQT3, Q5R7I1, Q7ZXE9, P12003, Q8QFP8, P34152, Q14258, O60504, Q3SWY2, Q8BIW1, Q62417, P48059, Q61792, Q68CZ2, Q9DDN6, O00560, Q14511, Q64727, Q99JW4, Q9BQL6, Q5REN1, Q04584, Q99PD6, Q9HBL0, Q155Q3	2834	84	10116	1.35981	1	0.718924	51.5359
GOTERM_CC_FAT	GO:0015934~large ribosomal subunit	13	0.289984	0.0496834	Q2TBI6, Q5BJJ8, Q4V8H8, Q99N91, P84100, P16039, Q5BJB7, Q0VFH6, Q95KE5, Q502B0, Q502C1, P0C2B8, Q6DGM3	2834	27	10116	1.71865	1	0.72552	53.5262
GOTERM_MF_FAT	GO:0043167~ion binding	1107	24.6933	0.000207068	Q8N4A0, Q8N1W1, P60323, Q9Y6I4, Q9PTJ3, Q6DN14, Q6DN12, Q8BW72, Q8IVH2, Q6PAF4, Q9XSA7, Q9EQT3, Q8BM47, Q8K4Q6, Q32NH8, Q5R8X1, Q8BI55, P22694, Q9UPZ9, Q1JPB9, P19382, P97762, Q8C7U7, Q95N78, Q66HT8, Q5HZL1, Q5FWF5, P22413, Q61097, Q68EI3, Q8NFT6, P47904, Q96BS2, P27046, Q5XHB4, Q7TMI3, O75077, P27006, Q791N7, Q32LQ3, P22681, Q32LQ4, Q5RBP4, Q13643, Q8VHJ5, P13667, Q810A1, Q13444, Q58D55, P17785,…	2957	3719	10694	1.07649	0.29208	0.29208	0.347897
GOTERM_MF_FAT	GO:0060589~nucleoside-triphosphatase regulator activity	146	3.25675	0.000296747	P46940, Q8N1W1, P34022, Q803Q4, O60890, B2RTY4, Q5VT25, Q3UIA2, Q86UR5, Q9NZL6, Q96PX9, O60292, O97902, P19803, P49796, P11274, A5PF44, Q03385, Q8BPM2, Q6IR34, Q8VHQ7, Q9HCH5, Q8R2V5, O54834, Q9ULL1, Q9H0H5, Q9P2F6, Q5VWQ8, Q5ZK62, Q13009, Q9P2F8, Q8IW93, Q8VDV3, Q1LUA6, O00410, Q92608, Q812A5, Q9P227, Q5DU25, Q9NU19, Q86VW2, Q5ZMV8, Q12851, Q14161, Q9NZN5, Q14644, P58802, O95819, Q6ZR37, Q5S007,…	2957	410	10694	1.28783	0.390459	0.219269	0.498216
GOTERM_MF_FAT	GO:0030695~GTPase regulator activity	144	3.21213	0.00031214	P46940, Q8N1W1, P34022, Q803Q4, O60890, B2RTY4, Q5VT25, Q3UIA2, Q86UR5, Q9NZL6, Q96PX9, O60292, O97902, P19803, P49796, P11274, A5PF44, Q03385, Q8BPM2, Q6IR34, Q8VHQ7, Q9HCH5, Q8R2V5, O54834, Q9ULL1, Q9H0H5, Q9P2F6, Q5VWQ8, Q5ZK62, Q13009, Q9P2F8, Q8IW93, Q8VDV3, Q1LUA6, O00410, Q92608, Q812A5, Q9P227, Q5DU25, Q9NU19, Q86VW2, Q5ZMV8, Q12851, Q14161, Q9NZN5, Q14644, P58802, O95819, Q6ZR37, Q5S007,…	2957	404	10694	1.28905	0.405913	0.159347	0.523994
GOTERM_MF_FAT	GO:0046872~metal ion binding	1079	24.0687	0.000337634	Q8N4A0, Q8N1W1, P60323, Q9Y6I4, Q9PTJ3, Q6DN14, Q6DN12, Q8BW72, Q8IVH2, Q6PAF4, Q9EQT3, Q8BM47, Q8K4Q6, Q32NH8, Q5R8X1, Q8BI55, P22694, Q9UPZ9, Q1JPB9, P19382, P97762, Q8C7U7, Q95N78, Q66HT8, Q5HZL1, Q5FWF5, P22413, Q61097, Q68EI3, Q8NFT6, P47904, Q96BS2, P27046, Q5XHB4, Q7TMI3, O75077, P27006, Q791N7, Q32LQ3, P22681, Q32LQ4, Q5RBP4, Q13643, Q8VHJ5, P13667, Q810A1, Q13444, P17785, B1AR13, Q32LP4,…	2957	3628	10694	1.07558	0.430655	0.131352	0.566678
GOTERM_MF_FAT	GO:0043169~cation binding	1088	24.2695	0.000347699	Q8N4A0, Q8N1W1, P60323, Q9Y6I4, Q9PTJ3, Q6DN14, Q6DN12, Q8BW72, Q8IVH2, Q6PAF4, Q9EQT3, Q8BM47, Q8K4Q6, Q32NH8, Q5R8X1, Q8BI55, P22694, Q9UPZ9, Q1JPB9, P19382, P97762, Q8C7U7, Q95N78, Q66HT8, Q5HZL1, Q5FWF5, P22413, Q61097, Q68EI3, Q8NFT6, P47904, Q96BS2, P27046, Q5XHB4, Q7TMI3, O75077, P27006, Q791N7, Q32LQ3, P22681, Q32LQ4, Q5RBP4, Q13643, Q8VHJ5, P13667, Q810A1, Q13444, Q58D55, P17785, B1AR13,…	2957	3661	10694	1.07478	0.440137	0.109536	0.583523
GOTERM_MF_FAT	GO:0005083~small GTPase regulator activity	97	2.16373	0.000817549	Q8N1W1, P46940, Q8BPQ7, Q8IV61, O75154, O60890, Q12774, Q5VT25, Q2PFD7, Q86UR5, Q9R0C8, Q9NZL6, Q96PX9, Q8NFW9, P19803, O97902, Q99K28, P11274, A5PF44, Q8R0S2, Q8BPM2, Q08DN7, A2AAJ9, Q8TDY4, Q8VHQ7, Q9HCH5, A2AWA9, Q8R2V5, O54834, Q66T02, Q8IUD2, Q9ULL1, O08967, Q3UHD9, Q5ZK62, Q13009, O15068, Q8IW93, Q8VDV3, Q80XC3, Q80T23, Q1LUA6, Q96DR7, Q92608, A3KGB4, Q5R5M3, Q8IV04, Q2TA45, Q06846, Q8WZ42,…	2957	262	10694	1.33893	0.744423	0.203375	1.36696
GOTERM_MF_FAT	GO:0016564~transcription repressor activity	82	1.82913	0.000927938	Q9DE09, P54254, Q60665, Q08117, P49918, Q60722, Q17QE2, Q7TSZ8, Q9BQA5, Q8IY57, Q8IVH2, Q8C8N2, Q15699, P56545, Q04724, Q06455, P39413, P41134, Q9R0G7, Q9Y2D1, O35780, P19382, Q9NR55, O35126, Q14582, O60284, Q9QXT8, Q9UBC3, Q9QYU4, Q91V33, P41970, Q7SYN5, P58463, Q8IMA8, P35638, O15164, O88282, Q9D6N5, Q8NB12, Q1WG82, Q8C208, Q90ZE2, Q9WV70, Q53H80, Q61187, Q03014, Q8AVU4, Q7TST9, Q2YDJ8, O88904,…	2957	216	10694	1.37293	0.787437	0.198457	1.55018
GOTERM_MF_FAT	GO:0003779~actin binding	119	2.65447	0.000963937	Q765P7, Q9UPN3, Q01082, Q8N3V7, O60890, Q29122, B2RTY4, Q0PMD2, Q6ZPF4, Q3B7N2, Q9Y4I1, Q96PY5, P07737, Q8WXH0, Q76I76, O43586, A5PF48, Q8VHX6, P31146, Q9C0D6, O75366, Q8WWI1, Q4FZC9, Q64727, Q5DTJ9, Q28626, Q6GLU8, O95198, Q91Z83, O93510, Q28824, O95466, Q61879, Q5RFN6, Q9UEY8, Q8VCX6, Q13643, P19352, Q9JHL4, P97814, P10587, O14639, Q9CYT6, P16419, O88801, Q9UKN7, O94832, Q6AYC4, O88387, Q9ULJ8,…	2957	333	10694	1.29238	0.799837	0.182151	1.60986
GOTERM_MF_FAT	GO:0008092~cytoskeletal protein binding	161	3.59135	0.000978812	Q765P7, Q9UPN3, Q01082, Q8N3V7, O60890, Q29122, B2RTY4, Q0PMD2, Q3B7N2, Q6ZPF4, Q9Y4I1, P07737, Q96PY5, Q8WXH0, Q76I76, O43586, A5PF48, Q8VHX6, O60504, P08037, Q9C0D6, P31146, O75366, Q8WWI1, Q4FZC9, O00560, Q5XIT1, Q64727, Q5DTJ9, Q9H0H5, Q6GLU8, Q28626, P61589, O95198, Q91Z83, O93510, P55002, Q5EAD0, Q28824, P46662, O95466, B5X5N3, Q61879, Q5RFN6, Q9UEY8, P27006, Q8R361, Q8VCX6, Q13643, P19352,…	2957	469	10694	1.24149	0.804747	0.165978	1.63451
GOTERM_MF_FAT	GO:0005096~GTPase activator activity	80	1.78452	0.00131404	Q9NYF5, P46940, Q8BPQ7, P34022, Q9Z2H2, Q8IV61, Q803Q4, O60890, B2RTY4, Q3UIA2, A4FUG8, Q91YM2, O60292, P19803, O97902, Q99K28, P49796, P11274, A5PF44, O08773, Q923Q2, Q6IR34, Q8TDY4, A2AWA9, Q8R2V5, O54834, Q9H0H5, Q9P2F6, Q5VWQ8, Q3UHD9, Q5ZK62, Q6PGG2, Q9JL25, Q80Y19, Q9P2F8, Q80XC3, Q8IW93, Q92608, A3KGB4, Q812A5, Q9P227, Q8IV04, Q2TA45, Q6PCS4, Q9NU19, Q14161, Q5ZMV8, Q5F361, Q9NZN5, Q5ZMM3,…	2957	212	10694	1.36472	0.888448	0.196941	2.18851
GOTERM_MF_FAT	GO:0046982~protein heterodimerization activity	58	1.29378	0.00209812	Q6TMG5, P04114, Q99814, O89026, Q64319, P18614, Q8IVH2, Q15699, P16039, Q9UKT9, P68370, Q9CUU3, Q9Z1P3, Q04721, Q63258, P10417, Q9Y6N7, Q6P9V9, O00560, Q99728, P50572, P20595, P55347, P04839, P58463, O08839, P56199, P67777, P23204, P41778, Q91Z83, P19686, P43432, Q9R1X4, Q8C208, O14920, Q8AVU4, Q9DG12, Q3T013, Q03519, P29274, Q5U2R1, Q6PBD4, P11835, Q63665, Q8QFP8, P51145, Q03958, Q5PPM5, Q5T2R2,…	2957	147	10694	1.42692	0.969903	0.27275	3.47283
GOTERM_MF_FAT	GO:0008047~enzyme activator activity	99	2.20834	0.00297923	P46940, P34022, Q803Q4, O60890, B2RTY4, Q3UIA2, O60292, O97902, P19803, P49796, P11274, Q99683, O88664, A5PF44, P79881, P50281, Q6IR34, P79880, P10619, P59046, Q8R2V5, O54834, P11276, Q9UGJ0, Q9Y239, Q9P2F6, Q9H0H5, Q5ZK62, Q5VWQ8, Q9P2F8, Q8IW93, Q92608, Q812A5, Q9P227, Q9NU19, Q14161, Q5ZMV8, Q9NZN5, Q14644, P58802, Q5S007, Q70Z35, O95433, Q8TB24, A7E300, Q3U0J8, Q96P47, P50398, Q90688, P07589,…	2957	278	10694	1.28789	0.993104	0.339482	4.89715
GOTERM_MF_FAT	GO:0008173~RNA methyltransferase activity	12	0.267678	0.00299324	Q2KHT8, Q9UI43, Q13395, O14717, Q5XJ57, Q9NXH9, A4QP75, A4IGH4, Q6IN84, Q32LD4, Q566V3, Q503J2	2957	18	10694	2.411	0.993264	0.319299	4.91965
GOTERM_MF_FAT	GO:0005509~calcium ion binding	291	6.49119	0.00419874	Q8N4A0, A1A5B4, Q32KJ8, P98155, P98157, Q8R0F8, O93319, Q6DN14, P98158, Q6DN12, Q1LWG4, Q91ZI0, Q3B7N2, Q7Z3S7, P62957, P16885, P23188, Q9IAT6, Q32NH8, Q1JPB9, P98164, O75366, P37217, Q8C7U7, Q4V8H8, Q9UBG0, Q9Y5F6, Q7TN88, Q61739, Q01841, P70549, Q03391, Q6PFX6, P10895, A2RUV0, Q28626, P56199, Q5REL2, Q9TS33, O93510, O00418, Q90Y57, Q6NYZ6, Q96BS2, Q62703, Q32KH9, P27006, P22681, P17251, P98133,…	2957	922	10694	1.14143	0.999105	0.394259	6.83593
GOTERM_MF_FAT	GO:0046914~transition metal ion binding	671	14.9677	0.010132	Q8N4A0, Q8N1W1, Q9Y6I4, P60323, Q9R1V4, Q9PTJ3, Q7TSV3, B2RTY4, Q5RIV4, Q8BW72, Q8IVH2, Q6PAF4, Q9C040, Q6KAS7, Q02084, O09173, Q8BM47, Q8K4Q6, Q16822, Q7SYK1, Q5R8X1, P19382, P97762, Q6NX31, Q8C7U7, Q95N78, Q8WWI1, Q86WB0, Q8R2V5, O77819, Q5HZL1, P55198, Q5FWF5, P20595, Q8BP31, Q61097, Q5ZK62, Q8R0V5, Q68EI3, Q8R173, P67777, Q8NFT6, Q0V967, P47904, P39689, Q9WTZ1, P27046, Q08705, Q5XHB4, Q7TMI3,…	2957	2264	10694	1.07185	1	0.677751	15.7497
GOTERM_MF_FAT	GO:0008270~zinc ion binding	549	12.2463	0.0112989	Q8N1W1, P60323, Q9Y6I4, Q9R1V4, Q9PTJ3, Q7TSV3, B2RTY4, Q5RIV4, Q8BW72, Q8IVH2, Q6PAF4, Q9C040, Q6KAS7, Q02084, Q8BM47, Q8K4Q6, Q7SYK1, Q5R8X1, P19382, P97762, Q6NX31, Q95N78, Q8WWI1, Q86WB0, Q8R2V5, O77819, Q5HZL1, P55198, Q5FWF5, Q8BP31, Q61097, Q5ZK62, Q8R173, Q68EI3, Q8NFT6, Q0V967, P47904, P39689, Q9WTZ1, P27046, Q08705, Q5XHB4, Q7TMI3, Q6AYK5, Q791N7, O75077, Q32LQ3, P22681, Q32LQ4, Q96K58,…	2957	1836	10694	1.08141	1	0.694136	17.4056
GOTERM_MF_FAT	GO:0005201~extracellular matrix structural constituent	21	0.468436	0.0150588	P20909, P20908, Q99K41, P98133, A0MSJ1, Q99715, Q3U962, Q9NNX1, Q16363, P08122, P02463, O08523, Q7SIB2, O93484, O46392, P02457, Q9BXX0, O88207, Q61245, P07942, P12107	2957	46	10694	1.65101	1	0.77435	22.5352
GOTERM_MF_FAT	GO:0004867~serine-type endopeptidase inhibitor activity	22	0.490743	0.0155198	P33005, P04366, O95980, Q63870, O73683, Q63416, Q90935, Q6NUX0, Q90275, Q5R4N8, Q6YHK3, Q06335, O43278, P15989, P13731, Q7YRQ8, Q95121, Q8BJD1, Q8IUB2, Q2UY09, P22777, O54819	2957	49	10694	1.62374	1	0.765299	23.1431
GOTERM_MF_FAT	GO:0015220~choline transmembrane transporter activity	6	0.133839	0.0200901	Q9JMD7, Q8BGY9, Q8WWI5, Q9GZV3, Q8UWF0, O70577	2957	7	10694	3.09986	1	0.831641	28.9319
GOTERM_MF_FAT	GO:0009008~DNA-methyltransferase activity	5	0.111532	0.0227077	O88509, Q4W5Z4, O14717, Q92072, Q9UBC3	2957	5	10694	3.6165	1	0.852754	32.06
GOTERM_MF_FAT	GO:0003886~DNA (cytosine-5-)-methyltransferase activity	5	0.111532	0.0227077	O88509, Q4W5Z4, O14717, Q92072, Q9UBC3	2957	5	10694	3.6165	1	0.852754	32.06
GOTERM_MF_FAT	GO:0003854~3-beta-hydroxy-delta5-steroid dehydrogenase activity	5	0.111532	0.0227077	A8DZE7, Q9R1J0, Q9EQC1, A6NKP2, Q5IFP1	2957	5	10694	3.6165	1	0.852754	32.06
GOTERM_MF_FAT	GO:0004549~tRNA-specific ribonuclease activity	8	0.178452	0.0248078	Q3SZ21, Q9CR08, Q8NCE0, Q8R040, Q80UU2, Q9BSV6, O75817, Q5RB79	2957	12	10694	2.411	1	0.864027	34.4756
GOTERM_MF_FAT	GO:0046983~protein dimerization activity	122	2.72139	0.0271537	O54968, P04114, Q99814, Q12904, P79145, Q64319, P84023, Q8IVH2, Q9UKT9, Q9CUU3, Q99683, Q63258, P33150, Q06455, Q80W57, P10417, P08037, P49715, Q9Y2D1, P31146, Q5SVZ6, O00560, Q9QYU4, P50572, P20595, Q99728, P27093, P22413, P58463, O08839, P67777, P56199, P41778, Q91Z83, P19686, Q0VCM0, P43432, Q9R1X4, O14920, Q9DG12, P35400, Q3SZZ2, O60675, Q5S007, P11835, P79386, P41740, Q924W6, P22770, P04366,…	2957	376	10694	1.17344	1	0.875968	37.0784
GOTERM_MF_FAT	GO:0005089~Rho guanyl-nucleotide exchange factor activity	34	0.758421	0.0276846	Q8N1W1, Q92608, Q5R5M3, Q8WZ42, Q12774, Q86VW2, Q9R0C8, Q9NZN5, Q96PX9, Q6ZV73, P11274, Q91VS8, Q6ZR37, Q70Z35, Q08DN7, P0C6P5, A2AAJ9, Q9BZ29, O88387, Q8CHT1, Q66T02, Q5VST9, Q58DL7, Q9ULL1, Q9Z206, Q13009, O15068, Q5R5T1, Q8IW93, Q12802, O15085, Q96DR7, Q1LUA6, Q6ZNL6	2957	88	10694	1.39729	1	0.869456	37.6536
GOTERM_MF_FAT	GO:0005088~Ras guanyl-nucleotide exchange factor activity	38	0.847647	0.0299217	Q8N1W1, Q92608, Q5R5M3, Q8IV61, Q8WZ42, Q12774, Q86VW2, Q9R0C8, Q9NZL6, Q9NZN5, Q96PX9, Q6ZV73, P11274, Q91VS8, Q6ZR37, Q70Z35, Q08DN7, P0C6P5, A2AAJ9, Q9BZ29, O88387, Q8CHT1, P18754, Q66T02, Q5VST9, Q58DL7, Q9ULL1, Q9Z206, Q13009, O15068, Q5R5T1, Q8IW93, Q12802, Q8VDV3, O15085, Q96DR7, Q6ZNL6, Q1LUA6	2957	101	10694	1.36066	1	0.87892	40.0243
GOTERM_MF_FAT	GO:0005518~collagen binding	13	0.289984	0.0333368	Q2KI80, Q14112, Q9H6X2, P56199, O94769, Q9CZ52, Q28178, Q0PMD2, P84023, O75445, Q28295, P51890, P18614	2957	26	10694	1.80825	1	0.895873	43.4801
GOTERM_MF_FAT	GO:0004879~ligand-dependent nuclear receptor activity	22	0.490743	0.0391199	P43135, Q03958, P49116, P10826, Q801G2, Q95N78, P49843, Q06725, P10588, Q1L673, Q8MIK0, O00482, Q7SYN5, P23204, Q04913, Q6DHP9, Q96RI1, Q9YH32, O42101, Q92753, P62510, P79386	2957	53	10694	1.50119	1	0.922703	48.9088
GOTERM_MF_FAT	GO:0003707~steroid hormone receptor activity	21	0.468436	0.039289	P43135, P49116, P10826, Q801G2, Q95N78, P49843, Q06725, P10588, Q1L673, Q8MIK0, O00482, Q7SYN5, P23204, Q04913, Q6DHP9, Q96RI1, Q9YH32, O42101, Q92753, P62510, P79386	2957	50	10694	1.51893	1	0.915934	49.06
GOTERM_MF_FAT	GO:0003714~transcription corepressor activity	32	0.713808	0.0399782	Q61187, Q08117, Q2YDJ8, Q60722, Q17QE2, Q8IY57, Q8C8N2, Q15699, O88904, Q9Z2V6, P56545, Q04724, Q96RI1, O43439, Q9Y2D1, O14770, O35126, Q9NR55, Q92786, Q9H2X6, Q14582, Q7M760, Q9UBC3, Q9QYU4, P41970, Q15742, P35638, P48552, Q9D6N5, Q9TUG2, Q9ERH7, Q8NB12	2957	84	10694	1.37772	1	0.912005	49.6715
GOTERM_MF_FAT	GO:0050840~extracellular matrix binding	12	0.267678	0.0431404	P19336, P14543, Q63258, Q9H4F8, O46542, Q28178, P12107, Q9ESS6, A6QLD2, Q61739, Q15582, A5A6L1	2957	24	10694	1.80825	1	0.920852	52.3897
GOTERM_MF_FAT	GO:0008201~heparin binding	28	0.624582	0.0434407	P11602, P04114, P20908, Q62009, O94769, O15520, Q9UKZ9, P51693, Q6UXX9, Q9Y5X9, P23359, P97857, Q06000, P21741, Q28178, Q12841, Q9W7C5, P11276, P36633, O88207, P07589, Q03350, Q8JHW2, P35440, Q15063, Q5R328, Q9UP79, A5A6L1	2957	72	10694	1.40642	1	0.915359	52.6405
GOTERM_MF_FAT	GO:0008378~galactosyltransferase activity	14	0.312291	0.0468482	O60513, Q6UX72, A8MXE2, Q9NS00, O60909, P14769, Q8IZQ1, Q864U8, Q7T3S5, Q91Z92, Q9Y2A9, Q5R5Y3, P08037	2957	30	10694	1.6877	1	0.924354	55.401
GOTERM_MF_FAT	GO:0003690~double-stranded DNA binding	22	0.490743	0.0478234	P51145, Q01826, P52701, Q00577, O08584, Q14966, Q9NUW8, P40692, Q9Z2D6, Q64318, P84023, Q6P0J3, Q03062, P56581, P29558, Q62947, Q96RI1, O35819, Q78E65, Q63665, Q9Y543, Q06609	2957	54	10694	1.47339	1	0.922259	56.1627

## Sheet: FOvsPMT
Category	Term	Count	%	PValue	Genes	List Total	Pop Hits	Pop Total	Fold Enrichment	Bonferroni	Benjamini	FDR
GOTERM_BP_FAT	GO:0007067~mitosis	95	1.88305	6.14649e-09	Q28CQ4, Q9CPV5, Q563C3, Q6NVU2, Q12834, Q07832, Q96R06, A4QP72, Q8R034, Q5XG87, O43482, Q99741, Q1LY10, Q9YHB5, Q5BKN4, Q7ZW63, Q9R1K5, Q1LX51, O08773, Q8R349, Q9YHY6, A1L2F3, A2BGR3, Q9UM13, Q86WB0, P20248, Q5XIT1, Q01986, O13067, P42695, Q503N2, Q90XC2, Q9CZJ6, Q8BKT8, Q0V967, A2BF66, Q9DGD3, B5X5N3, Q9R1X4, Q1T769, Q2TAW0, Q9CYC5, Q13257, Q96CS2, P54274, Q8WZ42, Q68EK9, Q2YDJ8, Q8NFH3, O08918,…	3529	180	11157	1.66858	2.92323e-05	2.92323e-05	1.16355e-05
GOTERM_BP_FAT	GO:0048285~organelle fission	99	1.96234	6.83531e-09	Q9CPV5, Q563C3, Q12834, Q07832, Q5XG87, O43482, Q1LY10, Q9YHB5, A2BGR3, Q969V5, Q86WB0, P20248, Q5XIT1, O13067, Q8BKT8, Q0V967, B5X5N3, Q9R1X4, Q1T769, Q9CYC5, P54274, O08918, O43264, Q02224, Q7ZXP1, Q8NHV4, Q3UA16, Q9IBG0, Q2TBN3, Q5XLR4, Q53EZ4, P83877, Q071E0, Q5ZIN1, Q9DGA0, P18754, Q02241, Q58EL7, Q5U3U6, P49025, Q29RT4, Q6DHG8, Q6DBR4, Q6DRJ7, Q28CQ4, Q6NVU2, A4QP72, Q96R06, Q8R034, Q99741,…	3529	190	11157	1.64732	3.25082e-05	1.62542e-05	1.29395e-05
GOTERM_BP_FAT	GO:0000087~M phase of mitotic cell cycle	96	1.90287	7.59156e-09	Q28CQ4, Q9CPV5, Q563C3, Q6NVU2, Q12834, Q07832, Q96R06, A4QP72, Q8R034, Q5XG87, O43482, Q99741, Q1LY10, Q9YHB5, Q5BKN4, Q7ZW63, Q9R1K5, Q1LX51, O08773, Q8R349, Q9YHY6, A1L2F3, A2BGR3, Q9UM13, Q86WB0, P20248, Q5XIT1, Q01986, O13067, P42695, Q503N2, Q90XC2, Q8K4R9, Q9CZJ6, Q8BKT8, Q0V967, A2BF66, Q9DGD3, B5X5N3, Q9R1X4, Q1T769, Q2TAW0, Q9CYC5, Q13257, Q96CS2, P54274, Q8WZ42, Q68EK9, Q2YDJ8, Q8NFH3,…	3529	183	11157	1.6585	3.61048e-05	1.20351e-05	1.43711e-05
GOTERM_BP_FAT	GO:0000280~nuclear division	95	1.88305	8.85717e-09	Q28CQ4, Q9CPV5, Q563C3, Q6NVU2, Q12834, Q07832, Q96R06, A4QP72, Q8R034, Q5XG87, O43482, Q99741, Q1LY10, Q9YHB5, Q5BKN4, Q7ZW63, Q9R1K5, Q1LX51, O08773, Q8R349, Q9YHY6, A1L2F3, A2BGR3, Q9UM13, Q86WB0, P20248, Q5XIT1, Q01986, O13067, P42695, Q503N2, Q90XC2, Q9CZJ6, Q8BKT8, Q0V967, A2BF66, Q9DGD3, B5X5N3, Q9R1X4, Q1T769, Q2TAW0, Q9CYC5, Q13257, Q96CS2, P54274, Q8WZ42, Q68EK9, Q2YDJ8, Q8NFH3, O08918,…	3529	181	11157	1.65936	4.21238e-05	1.05311e-05	1.67669e-05
GOTERM_BP_FAT	GO:0051301~cell division	129	2.55699	1.36138e-08	Q9CPV5, Q563C3, O75351, P47794, P36405, Q12834, Q07832, Q5XG87, O43482, Q1LY10, Q9YHB5, O75410, A2BGR3, Q86WB0, Q9H3R5, O77819, Q5XIT1, P20248, Q7ZWC4, O13067, Q9H0H5, P49706, P50279, Q8BKT8, Q0V967, O60583, B5X5N3, Q61879, Q9R1X4, Q9CYC5, Q1T769, P54274, P61025, Q8BWD8, O08918, O43264, Q02224, P97814, Q9JKX4, P10587, Q7ZXP1, P50995, Q8NHV4, Q3UA16, Q9IBG0, Q2TBN3, Q5XLR4, P83877, Q53EZ4, Q5U4U4,…	3529	267	11157	1.52748	6.47452e-05	1.29494e-05	2.57714e-05
GOTERM_BP_FAT	GO:0008033~tRNA processing	43	0.852329	2.81584e-07	Q9JI38, Q8NCE0, A4IHS0, Q9NXH9, Q9UJA5, A4IGH4, O02691, Q7TNK6, Q5RIV4, Q9BSV6, Q9NWX6, Q9WU56, Q29RY4, A4QP75, Q9D7B1, Q7SYK1, Q803X1, Q80UN9, Q9BRP7, Q5XGG2, Q99575, Q8WWH5, O75817, Q3SZ21, Q8C2P3, Q6GQ53, Q5E9U4, Q08C92, Q5XJ57, Q5BJI6, Q8R040, Q80UU2, Q8WW01, Q5RB79, P62313, Q9CR08, O14717, Q4KLT3, Q0P466, Q32M08, Q1HFZ0, Q6DC53, Q503J2	3529	68	11157	1.9992	0.00133832	0.000223178	0.000533047
GOTERM_BP_FAT	GO:0022402~cell cycle process	177	3.50842	5.18568e-07	Q8UVJ6, Q99PP2, Q9UPN3, Q9CPV5, P34022, Q9BXW9, Q563C3, P52701, Q07832, Q12834, P49918, P84023, Q5XG87, Q9JL70, O43482, Q1LY10, P28062, Q9EQT3, Q9YHB5, P98161, P10417, A2BGR3, Q86WB0, Q28178, Q5XIT1, P20248, Q8AXF4, Q99728, O13067, Q9H0H5, Q91V33, Q9Y236, Q99675, Q5EAD2, Q8K4R9, Q13555, Q8BKT8, Q0V967, Q5RAZ3, P46527, B2RZ50, P39689, B5X5N3, Q61879, Q5ZKY4, Q9R1X4, Q9CYC5, Q1T769, Q9Y580, P54274,…	3529	409	11157	1.36819	0.00246327	0.000352268	0.000981663
GOTERM_BP_FAT	GO:0007049~cell cycle	248	4.91576	9.0843e-07	P34022, O75351, Q563C3, P47794, Q07832, O75496, Q9UKG1, O43482, Q9EQT3, P28062, Q9YHB5, P98161, Q6NX31, Q9WTY9, Q86WB0, Q5XIT1, Q7ZWC4, Q8AXF4, Q99675, Q5REL2, Q8NFT6, Q8K4R9, Q13555, Q8BKT8, Q0V967, Q5RAZ3, P46527, P39689, Q61879, Q9D0N7, Q5ZKY4, Q9R1X4, Q9CYC5, Q812A5, Q7TMI3, Q9Y580, O08918, Q92698, O43264, Q7ZXP1, O95644, Q8NHV4, Q9IBG0, Q3UA16, Q5XLR4, Q7TQ20, Q80YR7, P83877, O88898, B5XCB8,…	3529	608	11157	1.28957	0.00431117	0.000539916	0.00171967
GOTERM_BP_FAT	GO:0000278~mitotic cell cycle	124	2.45788	1.09692e-06	Q8UVJ6, Q9CPV5, Q563C3, Q12834, Q07832, P49918, Q5XG87, O43482, Q1LY10, P28062, Q9EQT3, Q9YHB5, P10417, A2BGR3, Q86WB0, P20248, Q5XIT1, O13067, Q91V33, Q8K4R9, Q8BKT8, Q13555, Q0V967, P46527, B5X5N3, Q9R1X4, Q1T769, Q9CYC5, P54274, O08918, O43264, Q9R012, Q02224, O95644, Q7ZXP1, Q8NHV4, Q3UA16, Q9IBG0, Q2TBN3, Q5XLR4, Q7TQ20, P83877, Q53EZ4, Q8AYC9, Q071E0, Q5ZIN1, Q9DGA0, P18754, Q02241, Q60520,…	3529	271	11157	1.4466	0.00520339	0.000579496	0.00207649
GOTERM_BP_FAT	GO:0000279~M phase	118	2.33895	1.65717e-06	Q99PP2, P34022, Q9CPV5, Q9BXW9, Q563C3, P52701, Q12834, Q07832, Q5XG87, O43482, Q9JL70, Q1LY10, Q9YHB5, A2BGR3, Q86WB0, P20248, Q5XIT1, Q8AXF4, O13067, Q9Y236, Q8K4R9, Q8BKT8, Q0V967, B5X5N3, Q9R1X4, Q1T769, Q9CYC5, Q9Y580, P54274, P40692, Q92698, O08918, P43351, O43264, Q02224, Q7ZXP1, Q8NHV4, Q3UA16, Q9IBG0, Q2TBN3, Q3HNG7, Q5XLR4, P83877, Q53EZ4, Q071E0, Q5ZIN1, Q9DGA0, P18754, O43502, Q02241,…	3529	257	11157	1.45159	0.00785052	0.000787839	0.00313703
GOTERM_BP_FAT	GO:0022403~cell cycle phase	138	2.73538	8.74368e-06	Q99PP2, P34022, Q9CPV5, Q9BXW9, Q563C3, P52701, Q12834, Q07832, P49918, Q5XG87, Q9JL70, O43482, Q1LY10, Q9EQT3, Q9YHB5, P10417, A2BGR3, Q86WB0, Q5XIT1, P20248, Q8AXF4, O13067, Q91V33, Q9Y236, Q8K4R9, Q8BKT8, Q13555, Q0V967, P46527, B5X5N3, Q9R1X4, Q9CYC5, Q1T769, Q9Y580, P54274, P40692, Q92698, O08918, P43351, O43264, Q02224, O95644, Q7ZXP1, Q8NHV4, Q9IBG0, Q3UA16, Q2TBN3, Q5XLR4, Q3HNG7, Q7TQ20,…	3529	318	11157	1.37198	0.0407323	0.00377333	0.0165508
GOTERM_BP_FAT	GO:0034470~ncRNA processing	74	1.4668	8.87856e-06	Q9JI38, Q8NCE0, Q7TNK6, A4IGH4, Q6PBV6, Q5RIV4, Q91WM3, Q9CSH3, P50580, Q9BSV6, Q9WU56, A4QP75, Q6DRI7, Q9D7B1, Q01780, Q8NI36, Q7SYK1, Q7YRA3, Q9Y3A2, Q8WWH5, O75817, Q6GQ53, Q5E9U4, Q5XJ57, Q8R040, Q5BJI6, Q80UU2, Q5RB79, P62313, Q7SY48, Q2KHT8, P46087, Q9CR08, O14717, Q9UET6, Q32M08, O35130, Q6P0I8, Q6DC53, Q503J2, Q9NXH9, A4IHS0, Q9UJA5, O02691, A0JMQ0, Q9NWX6, Q14690, Q29RY4, Q5PQR5, Q3KRG3,…	3529	150	11157	1.55968	0.0413475	0.0035127	0.0168061
GOTERM_BP_FAT	GO:0006399~tRNA metabolic process	55	1.09019	9.38213e-05	P40329, P56192, Q9UGM6, Q9JI38, Q0V9S0, Q8NCE0, Q9UJA5, Q9NXH9, A4IHS0, Q7TNK6, O02691, A4IGH4, Q5RIV4, Q9BSV6, Q5RBL1, Q8TEA8, Q9NWX6, Q9WU56, Q29RY4, Q14CH7, A4QP75, Q9D7B1, Q7SYK1, Q80UN9, Q803X1, Q9BRP7, Q99575, Q5XGG2, Q1JPX3, Q8WWH5, O75817, Q3SZ21, Q9N0F3, Q8C2P3, Q6GQ53, Q08C92, Q5E9U4, Q9UHN1, Q5XJ57, Q8R040, Q5BJI6, Q80UU2, Q8WW01, Q6PI48, Q5RB79, P62313, Q9CR08, O14717, Q8BYL4, Q0P466,…	3529	110	11157	1.58076	0.359967	0.0337433	0.177458
GOTERM_BP_FAT	GO:0034660~ncRNA metabolic process	86	1.70466	0.000215933	Q9JI38, Q8NCE0, Q7TNK6, A4IGH4, Q6PBV6, Q5RIV4, Q91WM3, Q9CSH3, P50580, Q9BSV6, Q5RBL1, Q9WU56, Q14CH7, A4QP75, Q6DRI7, Q01780, Q9D7B1, Q8NI36, Q7SYK1, Q7YRA3, Q1JPX3, Q9Y3A2, Q8WWH5, O75817, Q9N0F3, Q6GQ53, Q5E9U4, Q9UHN1, Q5XJ57, Q8R040, Q5BJI6, Q80UU2, Q6PI48, Q5RB79, P62313, Q7SY48, Q2KHT8, P46087, Q9CR08, O14717, Q9UET6, Q8BYL4, Q32M08, O35130, Q6P0I8, Q6DC53, Q503J2, P40329, P56192, Q9UGM6,…	3529	194	11157	1.4015	0.641951	0.0707368	0.407977
GOTERM_BP_FAT	GO:0051253~negative regulation of RNA metabolic process	113	2.23984	0.000781336	Q8R409, P43135, P51531, Q08117, P49918, Q64318, Q60722, P50580, Q17QE2, P84023, P51532, Q8IVH2, P97831, P56545, Q2WG80, P39413, O60504, P49715, P19382, Q99020, O35126, Q00577, P15822, O60284, Q8NBF1, O95983, Q9QYU4, Q99728, Q6RVD7, P46527, Q5ZKY4, Q1WG82, Q9R1X4, Q04887, O54946, Q7TST9, Q9Z1J1, Q03062, O88904, Q9Z2V6, Q9R0L1, P56524, Q28G71, O43439, Q13118, P79386, Q924W6, Q9QXN1, Q8R216, Q9NTG7,…	3529	275	11157	1.2991	0.975705	0.219509	1.46878
GOTERM_BP_FAT	GO:0051172~negative regulation of nitrogen compound metabolic process	150	2.97324	0.000991518	P43135, Q8R409, P51531, P54254, P52701, Q08117, P49918, P50580, Q64318, Q60722, Q17QE2, P84023, P51532, O75496, Q8IVH2, P97831, Q9IA31, P56545, Q2WG80, P39413, Q9R0G7, O60504, P49715, P19382, Q99020, O35126, Q00577, Q9PTH3, P15822, O60284, Q8NBF1, O95983, Q9QYU4, Q99728, Q91V33, P41970, Q6RVD7, O60315, Q9Y543, P20749, P46527, Q1WG82, Q5ZKY4, Q9R1X4, Q04887, P54274, O54946, Q7TST9, Q9Z1J1, P40692,…	3529	381	11157	1.24469	0.991067	0.255375	1.86039
GOTERM_BP_FAT	GO:0045892~negative regulation of transcription, DNA-dependent	110	2.18038	0.00112576	Q8R409, P43135, P51531, Q08117, P49918, Q64318, Q60722, P50580, Q17QE2, P84023, P51532, Q8IVH2, P97831, P56545, Q2WG80, P39413, O60504, P49715, P19382, Q99020, O35126, Q00577, P15822, O60284, Q8NBF1, O95983, Q9QYU4, Q6RVD7, P46527, Q5ZKY4, Q1WG82, Q9R1X4, Q04887, O54946, Q7TST9, Q9Z1J1, Q03062, O88904, Q9Z2V6, Q9R0L1, P56524, Q28G71, O43439, Q13118, P79386, Q924W6, Q9QXN1, Q8R216, Q9NTG7, Q0P4H6,…	3529	269	11157	1.29281	0.995286	0.270303	2.10973
GOTERM_BP_FAT	GO:0045934~negative regulation of nucleobase, nucleoside, nucleotide and nucleic acid metabolic process	148	2.9336	0.00158088	P43135, Q8R409, P51531, P54254, P52701, Q08117, P49918, P50580, Q64318, Q60722, Q17QE2, P84023, P51532, O75496, Q8IVH2, P97831, Q9IA31, P56545, Q2WG80, P39413, Q9R0G7, O60504, P49715, P19382, Q99020, O35126, Q00577, Q9PTH3, P15822, O60284, Q8NBF1, O95983, Q9QYU4, Q99728, Q91V33, P41970, Q6RVD7, O60315, Q9Y543, P20749, P46527, Q1WG82, Q5ZKY4, Q9R1X4, Q04887, P54274, O54946, Q7TST9, Q9Z1J1, P40692,…	3529	379	11157	1.23458	0.99946	0.34166	2.95062
GOTERM_BP_FAT	GO:0051252~regulation of RNA metabolic process	441	8.74133	0.00194625	Q8BW74, O54968, Q92925, Q9I8V2, Q9Z2U4, Q60722, Q8BUR3, Q8IVH2, P07737, Q02080, Q9WTY1, Q9GKQ9, P19382, Q99020, Q9GZN2, Q95N78, P46937, O95983, Q5XIT1, P55198, Q9UFF9, Q9QYU4, Q02078, P61589, Q7ZVR8, P41778, Q08BY1, Q0VIA1, Q8CB77, Q8AXV6, Q5ZKY4, Q8NC51, Q9R1X4, Q90XW6, O54946, Q9DG12, Q7TST9, Q9Z2V6, Q810A1, O95644, Q7ZY13, O42101, Q9NTG7, Q8TAQ2, Q9NP71, P83871, Q5RCU4, O75486, O88898, Q9QXV1,…	3529	1248	11157	1.11717	0.999905	0.385934	3.62074
GOTERM_BP_FAT	GO:0030035~microspike assembly	14	0.277502	0.00217458	Q765P7, Q6ZV73, Q8R1S4, Q5EAD0, Q5R5T1, Q9UQB8, A1YB07, Q9DBJ3, O43312, Q8CFN2, Q61739, Q1LWE6, Q6ZNL6, O88387	3529	20	11157	2.21306	0.999968	0.404097	4.03728
GOTERM_BP_FAT	GO:0007155~cell adhesion	236	4.6779	0.00221681	P98088, O93319, Q91ZI0, Q8TDM5, P13595, P40240, Q69ZK9, O35206, O43184, O43586, P98161, O60504, P98160, Q80WM5, Q99569, Q90Y50, Q9BZZ2, Q8WWI1, P43121, O54834, P56745, Q9Y5F6, Q61739, P24043, Q95LG1, Q8IUX7, P61589, P56199, O35889, Q13349, Q15063, Q7ZW34, A5A6L1, O75077, O54946, Q28260, Q03062, Q13444, Q9QXH4, Q2UY09, Q17RW2, P07942, Q5RJH3, Q3UZZ4, Q62371, Q6V0I7, Q91V88, Q13332, Q9CZ52, P55849,…	3529	638	11157	1.16946	0.999974	0.395052	4.11414
GOTERM_BP_FAT	GO:0022610~biological adhesion	236	4.6779	0.00221681	P98088, O93319, Q91ZI0, Q8TDM5, P13595, P40240, Q69ZK9, O35206, O43184, O43586, P98161, O60504, P98160, Q80WM5, Q99569, Q90Y50, Q9BZZ2, Q8WWI1, P43121, O54834, P56745, Q9Y5F6, Q61739, P24043, Q95LG1, Q8IUX7, P61589, P56199, O35889, Q13349, Q15063, Q7ZW34, A5A6L1, O75077, O54946, Q28260, Q03062, Q13444, Q9QXH4, Q2UY09, Q17RW2, P07942, Q5RJH3, Q3UZZ4, Q62371, Q6V0I7, Q91V88, Q13332, Q9CZ52, P55849,…	3529	638	11157	1.16946	0.999974	0.395052	4.11414
GOTERM_BP_FAT	GO:0006396~RNA processing	175	3.46878	0.00255121	Q9NWZ8, Q8VE80, Q8NCE0, Q8VDW0, Q5SUE7, Q7TNK6, Q6PBV6, Q9H5Z1, Q5RIV4, P50580, Q9CSH3, Q9BSV6, Q6DRI7, Q7SYK1, Q7YRA3, A2BHJ4, Q9BUJ2, Q9H840, Q5ISE2, Q8WWH5, O75817, Q6GQ53, Q13151, P52435, Q9D0W5, Q5XJ57, P17844, Q80UU2, Q9BWJ5, B2RYD2, P46087, Q9CR08, O14717, Q7ZVR8, Q9UET6, Q32M08, Q6P0I8, O35130, O15116, Q6DC53, Q9WV35, Q503J2, Q9UJA5, P40692, P0C218, Q1LVE8, Q9JKP5, Q7ZUG0, Q8BZX4, Q5BJQ6,…	3529	461	11157	1.20014	0.999995	0.424335	4.72063
GOTERM_BP_FAT	GO:0016481~negative regulation of transcription	133	2.63627	0.00326839	P43135, Q8R409, P51531, P54254, Q08117, P49918, P50580, Q64318, Q60722, Q17QE2, P84023, P51532, Q8IVH2, P97831, Q9IA31, P56545, Q2WG80, P39413, Q9R0G7, O60504, P49715, P19382, Q99020, O35126, Q00577, P15822, O60284, Q8NBF1, O95983, Q9QYU4, Q91V33, P41970, Q6RVD7, O60315, Q9Y543, P20749, P46527, Q1WG82, Q5ZKY4, Q9R1X4, Q04887, O54946, Q7TST9, Q9Z1J1, Q03062, O88904, Q9Z2V6, Q9R0L1, P56524, Q28G71,…	3529	342	11157	1.22948	1	0.491837	6.00919
GOTERM_BP_FAT	GO:0006355~regulation of transcription, DNA-dependent	426	8.444	0.00346562	O54968, Q8BW74, Q92925, Q9I8V2, Q9Z2U4, Q60722, Q8BUR3, Q8IVH2, P07737, Q02080, Q9WTY1, Q9GKQ9, P19382, Q99020, Q9GZN2, Q95N78, P46937, O95983, Q5XIT1, P55198, Q9UFF9, Q9QYU4, Q02078, P61589, P41778, Q08BY1, Q0VIA1, Q8CB77, Q8AXV6, Q5ZKY4, Q9R1X4, Q90XW6, O54946, Q9DG12, Q7TST9, Q9Z2V6, Q810A1, O95644, Q7ZY13, O42101, Q9NTG7, Q8TAQ2, Q9NP71, P83871, Q5RCU4, O75486, O88898, Q9QXV1, Q9BR84, P27925,…	3529	1212	11157	1.11123	1	0.497402	6.36064
GOTERM_BP_FAT	GO:0046847~filopodium assembly	13	0.257681	0.00456864	Q765P7, Q6ZV73, Q8R1S4, Q5EAD0, Q5R5T1, Q9UQB8, A1YB07, Q9DBJ3, O43312, Q8CFN2, Q61739, Q1LWE6, Q6ZNL6	3529	19	11157	2.16314	1	0.581521	8.30332
GOTERM_BP_FAT	GO:0010558~negative regulation of macromolecule biosynthetic process	152	3.01288	0.00522427	P43135, Q8R409, P51531, P54254, Q9HCP6, Q08117, P49918, P50580, Q64318, Q60722, Q17QE2, P84023, P82808, O75496, P51532, Q8IVH2, P97831, Q9IA31, P56545, Q2WG80, P39413, Q9R0G7, O60504, P49715, P19382, Q99020, P59046, O35126, Q00577, Q9PTH3, P15822, O60284, Q8NBF1, O95983, Q9QYU4, P22413, Q91V33, P41970, Q6RVD7, O60315, Q9Y543, P20749, P46527, Q1WG82, Q5ZKY4, Q9R1X4, Q04887, P54274, O54946, Q7TST9,…	3529	401	11157	1.19838	1	0.616396	9.43989
GOTERM_BP_FAT	GO:0010605~negative regulation of macromolecule metabolic process	186	3.68682	0.0061463	P43135, Q8R409, P51531, Q9ESN0, P54254, P52701, Q9HCP6, Q08117, Q12834, P49918, P50580, Q64318, Q60722, Q17QE2, P84023, P82808, O75496, P51532, Q8IVH2, P97831, Q9IA31, P56545, Q2WG80, P28062, P39413, Q9R0G7, P06213, O60504, P49715, P19382, Q99020, P59046, O35126, Q9PTH3, Q00577, P15822, Q28178, O60284, Q8NBF1, O95983, Q9QYU4, Q99728, P22413, Q91V33, P41970, Q6RVD7, O60315, Q0V967, P20749, Q9Y543,…	3529	502	11157	1.1714	1	0.662436	11.0157
GOTERM_BP_FAT	GO:0043122~regulation of I-kappaB kinase/NF-kappaB cascade	31	0.61447	0.00975246	O54693, Q64337, O14920, A7YY44, O43657, Q9UDY8, Q4G3H4, P58801, Q68FR9, Q9R012, Q62894, Q16610, Q5M7X9, O15519, P59046, Q969V5, O88995, Q6GQQ9, P21333, Q645M6, P22934, Q7Z434, Q9Y239, P19438, P37198, P0C0T0, P61589, Q8CIS0, P16236, Q2KIB3, P25116	3529	65	11157	1.5078	1	0.810744	16.9331
GOTERM_BP_FAT	GO:0010629~negative regulation of gene expression	142	2.81467	0.00980112	P43135, Q8R409, P51531, P54254, Q08117, P49918, P50580, Q64318, Q60722, Q17QE2, P84023, Q8IVH2, P51532, P97831, Q9IA31, P56545, Q2WG80, P39413, Q9R0G7, P06213, O60504, P49715, P19382, Q99020, O35126, Q00577, P15822, O60284, Q8NBF1, O95983, Q9QYU4, Q91V33, P41970, Q6RVD7, O60315, Q9Y543, P20749, P46527, Q1WG82, Q5ZKY4, Q9R1X4, Q04887, O54946, Q7TST9, Q9Z1J1, O88904, Q03062, Q9Z2V6, P56524, Q9R0L1,…	3529	378	11157	1.18766	1	0.801171	17.0103
GOTERM_BP_FAT	GO:0007346~regulation of mitotic cell cycle	40	0.792864	0.0101591	Q5EG71, P98135, Q6P1W0, Q13257, P34022, Q9H0Z9, Q9IA88, P54274, Q14160, Q68EK9, Q8CFN2, P84023, P51532, O43264, Q01721, Q02224, Q9JKX4, Q99741, Q90459, P06213, O95714, P98177, P10417, Q7TPH6, Q9UM13, Q9NWT8, O43683, Q5RHI5, P51955, Q15013, Q9Y6X6, O88995, P18754, P42232, Q96DY7, P20248, Q5ZJU3, Q5TM83, A1A4R8, Q0V967	3529	89	11157	1.42091	1	0.801862	17.5764
GOTERM_BP_FAT	GO:0009890~negative regulation of biosynthetic process	155	3.07235	0.0118163	P43135, Q8R409, P51531, P54254, Q9HCP6, Q08117, P49918, P50580, Q64318, Q60722, Q17QE2, P84023, P82808, O75496, P51532, Q8IVH2, P97831, Q9IA31, P56545, Q2WG80, P39413, Q9R0G7, O60504, P49715, P19382, Q99020, P59046, O35126, Q00577, Q9PTH3, P15822, O60284, Q8NBF1, O95983, Q9QYU4, P22413, Q91V33, P41970, Q6RVD7, O60315, Q9Y543, P20749, P46527, Q1WG82, Q5ZKY4, Q9R1X4, Q04887, P54274, O54946, Q7TST9,…	3529	418	11157	1.17233	1	0.838564	20.1499
GOTERM_BP_FAT	GO:0006692~prostanoid metabolic process	10	0.198216	0.0120141	P19438, P04233, P07872, O35074, Q8HZJ2, P05979, P22934, O02768, Q8VCC1, Q5NVM4	3529	14	11157	2.25823	1	0.834106	20.4518
GOTERM_BP_FAT	GO:0006693~prostaglandin metabolic process	10	0.198216	0.0120141	P19438, P04233, P07872, O35074, Q8HZJ2, P05979, P22934, O02768, Q8VCC1, Q5NVM4	3529	14	11157	2.25823	1	0.834106	20.4518
GOTERM_BP_FAT	GO:0030036~actin cytoskeleton organization	83	1.64519	0.0128634	Q9NYT0, Q8BH64, O60890, Q90474, Q3ZBI6, Q80U19, Q5VT25, Q3UIA2, Q6ZPF4, Q3B7N2, P07737, Q96PY5, Q9EQT3, Q61233, P62329, Q8R1S4, Q76I76, A4UGR9, O43312, P10417, P31146, Q9C0D6, A2ASS6, Q8WWI1, P21333, Q4V8H8, O54834, O00560, P00519, O54931, Q96S53, Q9H0H5, P35580, Q3UHD9, P61589, O93510, O95466, Q61879, Q5RFN6, Q92608, Q92747, Q812A5, P26990, Q8WZ42, Q6R327, Q92177, Q13643, Q8CFN2, Q9NZN4, A5D7J5,…	3529	210	11157	1.24955	1	0.845246	21.7365
GOTERM_BP_FAT	GO:0006364~rRNA processing	32	0.634291	0.0137196	Q6PBV6, Q91WM3, P50580, Q9CSH3, A0JMQ0, Q14690, Q5PQR5, Q3KRG3, Q12788, Q8NI36, Q6DRI7, Q01780, Q7YRA3, Q9Y3A2, Q6IQU6, P56182, Q2KID0, Q3T0Q8, Q32LD4, P57678, P62313, Q9UI43, Q2KHT8, Q7SY48, Q9NY93, P46087, Q7ZVE0, Q9CR08, Q9UET6, Q6P0I8, O35130, Q96B26	3529	69	11157	1.46621	1	0.855202	23.0116
GOTERM_BP_FAT	GO:0051726~regulation of cell cycle	80	1.58573	0.0138192	Q8R409, P34022, Q563C3, P63018, Q9IA88, O75293, P49918, Q76B58, Q09167, Q9BQA5, P84023, P16039, P51532, O75496, Q99741, Q5RHQ8, Q9R1K5, Q00534, P06213, P10417, Q9UM13, Q9NWT8, Q5RHI5, Q15013, Q9Y6X6, P20248, Q5ZJU3, P49706, Q13309, Q5TM83, B5X8M4, Q0V967, O00311, P60484, O60583, Q8VCC1, P39689, P46527, Q2KIX1, P98135, Q5EG71, Q6P1W0, Q9H0Z9, Q13257, P54274, Q14160, Q68EK9, Q9WTQ7, Q7TST9, O08918,…	3529	202	11157	1.25209	1	0.849069	23.1586
GOTERM_BP_FAT	GO:0030029~actin filament-based process	87	1.72448	0.0138592	Q9NYT0, Q8BH64, Q29122, O60890, Q90474, Q3ZBI6, Q80U19, Q5VT25, Q3UIA2, Q6ZPF4, Q3B7N2, Q9Y4I1, P07737, Q96PY5, Q9EQT3, Q64119, Q61233, P62329, Q8R1S4, Q76I76, A4UGR9, O43312, Q8VHX6, P10417, P31146, Q9C0D6, A2ASS6, Q8WWI1, P21333, Q4V8H8, O54834, O00560, P00519, O54931, Q96S53, Q9H0H5, P35580, Q3UHD9, P61589, O93510, O95466, Q61879, Q5RFN6, Q92608, Q92747, Q812A5, P26990, Q8WZ42, Q6R327, Q92177,…	3529	222	11157	1.23897	1	0.841779	23.2176
GOTERM_BP_FAT	GO:0031327~negative regulation of cellular biosynthetic process	152	3.01288	0.0139724	P43135, Q8R409, P51531, P54254, Q08117, P49918, P50580, Q64318, Q60722, Q17QE2, P84023, P82808, P51532, O75496, Q8IVH2, P97831, Q9IA31, P56545, Q2WG80, P39413, Q9R0G7, O60504, P49715, P19382, Q99020, P59046, O35126, Q00577, Q9PTH3, P15822, O60284, Q8NBF1, O95983, Q9QYU4, P22413, Q91V33, P41970, Q6RVD7, O60315, Q9Y543, P20749, P46527, Q1WG82, Q5ZKY4, Q9R1X4, Q04887, P54274, O54946, Q7TST9, Q9Z1J1,…	3529	411	11157	1.16922	1	0.836131	23.3843
GOTERM_BP_FAT	GO:0006260~DNA replication	59	1.16947	0.0143553	P84173, Q6B6N4, Q7ZVM9, Q9WUK4, P35244, Q66I84, P35249, Q5XG87, P49321, Q99741, Q99315, Q3YBR2, Q3V6T2, P08651, Q8QHA5, P30664, Q6DIH3, A2ASS6, Q6NX31, Q00577, Q9UHN1, Q3T0X9, Q96S55, Q92089, P15927, Q9YHZ6, O00311, Q9D0N7, Q5ZKY4, Q9WUV0, P97499, Q6P1W0, Q9BRX5, Q9DEY9, P54274, Q7Z5Q5, A7YWS7, P49005, P04047, Q14691, Q561P5, Q9Y253, P29558, Q9Y248, Q8R323, Q7TQ20, Q91628, Q58DC8, P33610, P52948,…	3529	143	11157	1.3044	1	0.836297	23.9455
GOTERM_BP_FAT	GO:0030174~regulation of DNA replication initiation	8	0.158573	0.0144201	P30664, Q99741, Q80YR7, Q6DIH3, Q6NX31, Q96S55, Q6DBR4, Q561P5	3529	10	11157	2.52922	1	0.82989	24.0401
GOTERM_BP_FAT	GO:0033043~regulation of organelle organization	60	1.1893	0.0148227	Q9UPN3, Q6TS35, P34022, Q01082, Q563C3, Q8N3V7, P27816, Q5R4B6, P16039, Q8BX02, P62329, Q62261, Q9ERE4, Q3V6T2, P06213, O60504, P31146, Q9NWT8, Q9UM13, Q9JMC1, P61589, O93510, Q0V967, P46527, B5X5N3, P98135, Q5EG71, Q90ZE2, P20929, Q92747, Q9WV70, P26990, Q13257, P54274, Q6R327, Q8CFN2, Q63273, Q02224, P07992, O95714, Q7TPH6, Q68FP1, Q6AYC4, O15344, O43683, Q03001, O15143, P51955, P18754, O88995,…	3529	146	11157	1.29925	1	0.830619	24.6253
GOTERM_BP_FAT	GO:0051129~negative regulation of cellular component organization	45	0.891972	0.0164569	Q9WV70, Q6TS35, Q13257, Q01082, P53690, P59644, P54274, P27816, Q61644, Q5R4B6, Q8CFN2, P16039, Q8BX02, O95754, Q02224, P62329, Q62261, Q99JB8, P07992, P50281, P34152, Q68FP1, Q6AYC4, O15344, P31146, Q9NWT8, Q9JMC1, O75385, O43683, Q9Z2D6, Q9H254, A2ALU4, P54763, P61589, P06396, O95631, Q7L099, P53804, P49025, O93510, Q0V967, P60484, Q13275, P15146, O15943	3529	105	11157	1.35494	1	0.854106	26.9573
GOTERM_BP_FAT	GO:0042770~DNA damage response, signal transduction	26	0.515362	0.0166636	Q6P1W0, Q9H0Z9, Q9BX63, P52701, Q8AYC9, Q29122, Q5RHI5, Q9H2X6, P40692, O88898, P00519, P20248, Q9BQA5, O54842, O88904, Q03468, B5X8M4, Q8WTP8, A6H7B8, Q568D5, Q90459, P20749, O15350, P98177, Q6DBR4, Q5ZKY4	3529	54	11157	1.52221	1	0.850857	27.2474
GOTERM_BP_FAT	GO:0001817~regulation of cytokine production	38	0.753221	0.0167909	Q53H80, Q9JIP4, Q8CI15, Q02111, A7YY44, Q5E9Z7, Q9UDY8, P84023, Q6P0C7, P58801, Q6NXY9, Q5ZM39, Q5ZPR3, Q5RF74, P22770, Q8WUI4, P59046, Q8K4B2, P29452, Q28178, P42232, Q12933, Q7Z434, O13076, Q9Y239, O95361, Q6A2H4, Q3ZTK5, Q8CIS0, P17213, P16236, P40189, P17676, Q9H1D9, A0JN71, P20749, P25116, Q04207	3529	86	11157	1.39695	1	0.846326	27.4255
GOTERM_BP_FAT	GO:0007059~chromosome segregation	29	0.574827	0.0171907	Q28CQ4, Q1T769, Q9CYC5, Q9CPV5, Q13257, Q563C3, Q8WZ42, P40692, Q8NFH3, Q8NFH4, O43264, Q5XG87, Q02224, Q3UA16, Q6NW76, P60330, P51955, Q9H3R5, O43502, Q0IHP2, P42695, Q9CXH7, Q58EL7, P49025, Q9D3E6, Q96IY1, Q6DHG8, B5X5N3, Q6DRJ7	3529	62	11157	1.47877	1	0.84654	27.9821
GOTERM_BP_FAT	GO:0007010~cytoskeleton organization	137	2.71556	0.0203839	Q8UVJ6, Q9UPN3, Q9NYT0, P34022, O60890, Q5VT25, Q3UIA2, Q6ZPF4, Q3B7N2, Q96PY5, P07737, Q9EQT3, Q76I76, Q7ZV84, O43312, P10417, P34152, Q9C0D6, P31146, A2ASS6, Q969V4, Q8WWI1, O54834, Q4V8H8, O00560, O76050, Q9H0H5, Q810W7, P61589, O93510, Q8BKT8, O95466, Q61879, Q5RFN6, Q92608, P26990, Q812A5, P82347, P40692, Q92177, Q13643, Q9Y4G6, Q8VHJ5, Q9NZN4, O43264, A5D8S0, P10587, O14639, Q9CYT6, Q3UA16,…	3529	371	11157	1.16746	1	0.886575	32.2849
GOTERM_BP_FAT	GO:0016072~rRNA metabolic process	32	0.634291	0.0216253	Q6PBV6, Q91WM3, P50580, Q9CSH3, A0JMQ0, Q14690, Q5PQR5, Q3KRG3, Q12788, Q8NI36, Q6DRI7, Q01780, Q7YRA3, Q9Y3A2, Q6IQU6, P56182, Q2KID0, Q3T0Q8, Q32LD4, P57678, P62313, Q9UI43, Q2KHT8, Q7SY48, Q9NY93, P46087, Q7ZVE0, Q9CR08, Q9UET6, Q6P0I8, O35130, Q96B26	3529	71	11157	1.42491	1	0.895691	33.891
GOTERM_BP_FAT	GO:0030198~extracellular matrix organization	41	0.812686	0.0237157	Q95LI2, P19336, P98088, P20908, Q62009, O94769, P26009, Q3U962, P17931, Q99715, Q06335, P51532, P51693, O95450, P10587, Q9WTK5, P17785, O00300, A6QLD2, P08037, P98160, P34152, Q91V88, O95980, P14543, P33072, Q99K41, A6QLN9, Q8BJ66, Q15582, P13731, O88207, P79331, Q8TDX6, Q9H4F8, P12107, Q15063, P20749, P59511, P16924, A5A6L1	3529	96	11157	1.35023	1	0.911852	36.5143
GOTERM_BP_FAT	GO:0009451~RNA modification	20	0.396432	0.025702	Q6GQ53, Q9JI38, Q5XJ57, A4IGH4, Q6PBV6, Q32LD4, Q08C69, Q9NWX6, Q9WU56, O95453, Q3SYR3, Q2KHT8, Q9UI43, Q9UET6, Q7SYK1, Q803X1, Q5XGG2, Q6DC53, Q8WWH5, Q9WV35	3529	40	11157	1.58076	1	0.924221	38.9153
GOTERM_BP_FAT	GO:0002819~regulation of adaptive immune response	14	0.277502	0.0270185	A0JPN1, Q9Y275, P20693, P23492, Q03519, Q12933, Q9UDY8, P58801, Q6A2H4, Q3ZTK5, P15151, P40189, Q5ZM39, A0JN71	3529	25	11157	1.77045	1	0.929948	40.459
GOTERM_BP_FAT	GO:0030111~regulation of Wnt receptor signaling pathway	23	0.455897	0.0270758	Q8UVJ6, Q9QXN1, Q5RJ80, Q03014, Q3SZE3, O15520, P97401, Q7M760, Q804T6, Q9QYZ8, Q04724, Q8IMA8, Q99750, Q9UBU2, O60315, Q9P1T7, Q9R0G7, Q9QYP1, Q99966, Q8MJK1, Q9UBP4, O88803, Q06831	3529	48	11157	1.51489	1	0.926536	40.5254
GOTERM_BP_FAT	GO:0010564~regulation of cell cycle process	29	0.574827	0.0273288	P98135, Q5EG71, Q9H0Z9, P34022, Q13257, Q563C3, P54274, Q8CFN2, P51532, P16039, O43264, Q01721, Q02224, Q9R1K5, P06213, O95714, Q7TPH6, Q9NWT8, Q9UM13, O43683, Q15013, P51955, O88995, P18754, Q9Y6X6, A1A4R8, Q0V967, O00311, Q6DBR4	3529	64	11157	1.43256	1	0.92453	40.8175
GOTERM_BP_FAT	GO:0051052~regulation of DNA metabolic process	29	0.574827	0.0273288	Q6B6N4, P52701, P54274, Q9Z2A6, P40692, Q8CFN2, O75496, Q561P5, Q569C3, Q9Y253, Q99741, P07992, Q568D5, Q3V6T2, Q5ZM39, P06213, Q8QHA5, Q80YR7, P30664, Q6DIH3, Q9PTH3, Q6NX31, P23492, Q96S55, O95271, Q3ZTK5, B5X8M4, Q06609, Q6DBR4	3529	64	11157	1.43256	1	0.92453	40.8175
GOTERM_BP_FAT	GO:0032774~RNA biosynthetic process	68	1.34787	0.0274159	Q9Y2Y1, Q99814, P29540, Q5E9Z7, Q15699, Q6JPI3, Q6DV79, Q9D7M8, P08651, P49716, Q9NR48, Q05AM5, P49715, A8KBY2, P61969, P52435, Q9NR55, O95905, Q3UKU1, O75529, P78424, Q5R8H5, Q9WV30, Q91857, P56270, P35638, O15164, Q8CB77, Q8VCP8, O60583, Q76KJ5, Q9Y603, Q8VI33, Q05B56, Q9Y2W1, P85125, Q9Y535, Q12962, O00268, Q14494, O95644, Q6DHP9, Q9QYL7, A0JN61, Q13873, P98177, Q15542, P51145, Q8R0A0, O75486,…	3529	173	11157	1.24268	1	0.921331	40.9177
GOTERM_BP_FAT	GO:0046578~regulation of Ras protein signal transduction	79	1.56591	0.0286742	Q8N1W1, Q12774, Q2PFD7, Q5RHR6, Q9R0C8, Q96PX9, Q8C8N2, Q80U12, O97902, Q99K28, P27987, Q04721, P11274, Q8R0S2, Q08DN7, Q8TDY4, A2ASS6, A2AWA9, Q8R2V5, Q66T02, Q01986, Q9ULL1, O08967, P52734, Q3UHD9, Q5ZK62, Q13009, O15068, Q0P5E3, Q80XC3, Q8IW93, Q1LUA6, Q96DR7, A3KGB4, Q5R5M3, P26990, Q8IV04, Q2TA45, Q14160, Q8WZ42, B5DFA1, Q5DU25, Q9NU19, Q14161, Q86VW2, Q6R327, Q5F361, Q9NZN5, P58802, Q6ZV73,…	3529	205	11157	1.21834	1	0.926518	42.3481
GOTERM_BP_FAT	GO:0000122~negative regulation of transcription from RNA polymerase II promoter	71	1.40733	0.028827	Q8R409, P43135, P51531, Q02556, Q60665, Q08117, P49918, Q60722, Q64318, Q17QE2, P84023, P51532, Q8IVH2, Q15699, Q9Z1Z2, Q04724, P39413, P08651, O60504, P49715, P19382, O35126, P15822, Q14582, O60284, Q8NBF1, Q9UJQ4, O95983, Q9QXT8, Q9QYU4, Q9Y6X8, Q5TM83, Q6RVD7, O88282, Q9D6N5, Q1WG82, Q9R1X4, Q9WV70, Q03014, Q8AVU4, O08954, Q03062, O88904, Q9Z2V6, Q6PBD4, Q9R0L1, P56524, Q96RI1, Q5ZM39, Q13118,…	3529	182	11157	1.23334	1	0.923939	42.5195
GOTERM_BP_FAT	GO:0006261~DNA-dependent DNA replication	17	0.336967	0.031721	P30664, Q6DIH3, Q9UHN1, Q00577, Q6NX31, P49005, P33610, A7YWS7, P35249, P15927, Q561P5, P49642, Q9YHZ6, Q5E9K7, Q06609, Q6DBR4, Q8QHA5	3529	33	11157	1.62866	1	0.938422	45.6768
GOTERM_BP_FAT	GO:0007229~integrin-mediated signaling pathway	28	0.555005	0.0318085	Q9R1V4, Q6ZM19, O75077, P26009, Q9R0C8, Q05910, P18614, Q91YM2, P26012, P56945, Q9QXH4, Q63258, Q06274, Q00651, P11835, Q9GLP0, Q08DN7, P34152, Q03001, Q13797, Q14511, Q61739, P05106, Q5M9B3, P56199, Q13349, P59511, Q4KM33	3529	62	11157	1.42778	1	0.935774	45.7697
GOTERM_BP_FAT	GO:0032355~response to estradiol stimulus	13	0.257681	0.0322059	P51145, Q6DV79, Q9UBS8, Q9Z2A6, P29371, P07323, Q9H3M7, P28562, P05696, P06213, P60484, P20248, P55212	3529	23	11157	1.78695	1	0.934875	46.1896
GOTERM_BP_FAT	GO:0007052~mitotic spindle organization	7	0.138751	0.0327605	Q8JGS1, O95271, O43663, P18754, Q3UA16, Q02241, Q6DRJ7	3529	9	11157	2.45896	1	0.934869	46.7703
GOTERM_BP_FAT	GO:0042127~regulation of cell proliferation	170	3.36967	0.0334164	P51531, P98088, Q8CI15, Q9JJN1, Q02111, P49918, O15520, Q64318, Q8IZQ8, P84023, P40240, Q9JL70, Q9IA31, P56545, O14514, O57535, P32301, P33150, P34743, Q3V6T2, P06213, P10417, Q9H6Z9, P08037, P49715, P31146, Q9PTH3, Q00577, Q3T0X9, P25963, Q28178, P20248, P19483, Q9UFF9, P46087, Q99675, P41778, Q5REL2, P46662, Q9NS56, P46527, P39689, Q9HBH1, Q5ZKY4, P43432, Q5EG71, P98135, O89101, Q03112, Q04887,…	3529	475	11157	1.13149	1	0.935413	47.4495
GOTERM_BP_FAT	GO:0051056~regulation of small GTPase mediated signal transduction	94	1.86323	0.0334445	Q8N1W1, Q8TEU7, P46940, Q8IV61, Q12774, Q2PFD7, Q5RHR6, Q9R0C8, Q9NZL6, Q96PX9, Q8C8N2, Q92565, Q80U12, O97902, Q99K28, Q6GYQ0, P11274, P27987, Q04721, A5PF44, Q03385, Q8R0S2, Q08DN7, Q8TDY4, A2ASS6, A2AWA9, Q8R2V5, Q66T02, Q01986, Q9ULL1, O08967, P52734, Q5VWQ8, Q3UHD9, Q5ZK62, Q13009, O15068, Q9P2F8, Q0P5E3, Q8IW93, Q80XC3, Q1LUA6, Q96DR7, A3KGB4, Q5R5M3, P26990, Q8IV04, Q2TA45, Q14160, Q8WZ42,…	3529	250	11157	1.18873	1	0.932551	47.4784
GOTERM_BP_FAT	GO:0035113~embryonic appendage morphogenesis	30	0.594648	0.035873	Q03112, O88413, Q03113, P18860, Q68F54, Q90275, Q7TST9, Q9JKP5, Q9Y5Y0, P51532, Q15699, Q6P0J3, Q9IA31, Q01721, Q90693, Q9NW07, Q04721, Q13099, O57460, Q9QYP1, A1IGX5, Q9QXN1, Q9NR56, Q68CZ1, O88898, Q9UJQ4, Q7ZUA6, P41778, P21279, P82471	3529	68	11157	1.39479	1	0.942058	49.9209
GOTERM_BP_FAT	GO:0045449~regulation of transcription	665	13.1814	0.0359174	Q8BW74, O54968, Q92925, Q60722, Q9Z2U4, Q9I8V2, Q8BUR3, Q8BW72, Q8IVH2, P07737, Q6KAS7, Q02080, Q9WTY1, Q5R8X1, Q9GKQ9, P19382, A7E2Z2, Q8WUI4, Q62733, Q9GZN2, Q99020, Q8BKT3, Q95N78, P46937, O95983, Q5XIT1, P55198, Q9QYU4, Q9UFF9, Q02078, P61589, P41778, Q0VIA1, Q08BY1, Q8CB77, Q8AXV6, Q5ZKY4, Q9R1X4, Q90XW6, Q791N7, O54946, Q96K58, Q7TST9, Q9DG12, Q810A1, Q9Z2V6, O15090, P60003, O95644, Q7ZY13,…	3529	1992	11157	1.05543	1	0.939548	49.9646
GOTERM_BP_FAT	GO:0006275~regulation of DNA replication	18	0.356789	0.0360407	P30664, Q80YR7, Q6DIH3, Q9PTH3, Q6B6N4, Q6NX31, P54274, Q9Z2A6, Q96S55, Q8CFN2, Q561P5, O75496, O95271, Q99741, Q3V6T2, P06213, Q6DBR4, Q8QHA5	3529	36	11157	1.58076	1	0.937402	50.0857
GOTERM_BP_FAT	GO:0016322~neuron remodeling	6	0.11893	0.0360983	B6ZK77, Q91VS8, P21279, Q9JI33, P82471, Q9HB63	3529	7	11157	2.70987	1	0.934922	50.142
GOTERM_BP_FAT	GO:0033574~response to testosterone stimulus	5	0.099108	0.0373113	P11884, P67999, P28562, P06213, P55212	3529	5	11157	3.16152	1	0.938102	51.3165
GOTERM_BP_FAT	GO:0006110~regulation of glycolysis	5	0.099108	0.0373113	O95905, P56524, Q9NP71, P06213, Q9UGJ0	3529	5	11157	3.16152	1	0.938102	51.3165
GOTERM_BP_FAT	GO:0006839~mitochondrial transport	21	0.416254	0.0375037	O97562, Q3B7H2, Q287T7, Q9Y619, P12236, B1AXP6, Q7T2P6, Q6DGJ3, Q9QYU4, Q5RBC8, Q4VBW0, Q27HK4, Q6DEM5, Q62760, Q6DI06, Q2L969, Q99797, O02703, P10417, Q6P825, O43772	3529	44	11157	1.50891	1	0.93636	51.5003
GOTERM_BP_FAT	GO:0042254~ribosome biogenesis	40	0.792864	0.0383084	Q6ZM19, Q6PBV6, Q91WM3, Q9CSH3, P50580, A0JMQ0, Q14690, P16039, Q5PQR5, Q3KRG3, Q9JKX4, Q12788, Q8NI36, Q6DRI7, Q01780, Q5XH16, Q7YRA3, Q9Y3A2, Q6IQU6, P56182, Q2KID0, Q3T0Q8, Q8UVY2, Q32LD4, Q91YE6, P57678, P62313, Q7SY48, Q2KHT8, Q9UI43, Q9NY93, P46087, Q5RDW1, Q7ZVE0, Q5R673, Q9CR08, Q9UET6, Q6P0I8, O35130, Q96B26	3529	96	11157	1.3173	1	0.937512	52.2622
GOTERM_BP_FAT	GO:0045580~regulation of T cell differentiation	14	0.277502	0.0387229	A0JPN1, P23492, Q90999, P42232, Q64318, P58801, P04233, P00491, Q62947, P27987, Q8CIS0, Q95118, Q5ZM39, A0JN71	3529	26	11157	1.70236	1	0.936845	52.6502
GOTERM_BP_FAT	GO:0060173~limb development	36	0.713578	0.0392608	P43135, O88413, Q03112, Q03113, P18860, Q68F54, Q90275, Q7TST9, O15520, Q9JKP5, Q9Y5Y0, P51532, Q15699, Q6P0J3, Q9IA31, Q01721, Q90693, Q9NW07, Q04721, Q13099, A1IGX5, Q9QYP1, P41413, Q28056, P56673, Q9QXN1, Q9NR56, Q68CZ1, O88898, Q9UJQ4, Q7ZUA6, O00238, P41778, P21279, O02703, P82471	3529	85	11157	1.339	1	0.936753	53.1492
GOTERM_BP_FAT	GO:0010627~regulation of protein kinase cascade	62	1.22894	0.0411539	Q80XF5, Q9JJN1, O43657, Q68FR9, Q99683, Q9ERE9, Q9R0G7, P06213, O60504, Q5M7X9, P59046, O15519, Q969V5, Q6Q0C0, P21333, Q645M6, P22934, Q7Z434, P19438, Q9Y239, P61589, Q2KIB3, O60315, P46662, P60484, P25116, O54693, Q64337, O14920, O35716, A7YY44, Q6R327, Q8CFN2, Q9UDY8, Q4G3H4, Q9UPT6, P58801, Q9H422, Q62894, Q9R012, Q16610, Q7ZY13, Q5RB23, Q9P1T7, O88387, P00435, Q9H2X6, O88995, Q6GQQ9, P37198,…	3529	159	11157	1.23279	1	0.94246	54.8664
GOTERM_BP_FAT	GO:0006351~transcription, DNA-dependent	66	1.30823	0.0435321	Q9Y2Y1, Q99814, P29540, Q5E9Z7, Q15699, Q6JPI3, Q6DV79, Q9D7M8, P08651, P49716, Q9NR48, P49715, Q05AM5, A8KBY2, P61969, P52435, Q9NR55, O95905, Q3UKU1, O75529, P78424, Q5R8H5, Q9WV30, Q91857, P56270, P35638, O15164, Q8CB77, Q8VCP8, O60583, Q76KJ5, Q9Y603, Q8VI33, Q05B56, Q9Y2W1, P85125, Q12962, Q9Y535, O00268, Q14494, O95644, Q6DHP9, Q9QYL7, A0JN61, Q13873, P98177, Q15542, P51145, Q8R0A0, O75486,…	3529	171	11157	1.22024	1	0.949279	56.939
GOTERM_BP_FAT	GO:0008360~regulation of cell shape	23	0.455897	0.0440705	P31146, Q9JM96, Q9QXN0, Q03113, Q00587, Q6TEL3, O54931, Q5REN1, P11276, P52734, Q91YM2, P35580, Q8JZX9, A5D7J5, Q9JKQ2, Q6ZV73, P10587, Q9EQT3, Q63258, P07589, Q8BR92, Q61879, O88387, Q6ZNL6	3529	50	11157	1.4543	1	0.949065	57.3956
GOTERM_BP_FAT	GO:0048634~regulation of muscle development	15	0.297324	0.0449215	Q9NPI5, Q9QXN1, Q5PPM5, Q6AZB0, Q8AVU4, Q7TST9, P67999, Q8IZQ8, Q6IRB2, P84023, Q9Z2V6, Q6PBD4, P56524, Q9NQ29, P10417	3529	29	11157	1.63527	1	0.949935	58.1078
GOTERM_BP_FAT	GO:0035108~limb morphogenesis	35	0.693756	0.0449633	O88413, Q03112, Q03113, P18860, Q68F54, Q90275, Q7TST9, O15520, Q9JKP5, Q9Y5Y0, P51532, Q15699, Q6P0J3, Q9IA31, Q01721, Q90693, Q9NW07, Q04721, Q13099, A1IGX5, Q9QYP1, P41413, Q28056, P56673, Q9QXN1, Q9NR56, Q68CZ1, O88898, Q9UJQ4, Q7ZUA6, O00238, P41778, P21279, O02703, P82471	3529	83	11157	1.33317	1	0.948014	58.1425
GOTERM_BP_FAT	GO:0022613~ribonucleoprotein complex biogenesis	53	1.05055	0.0457425	Q9NWZ8, Q6ZM19, P78362, Q6PBV6, Q91WM3, P50580, Q9CSH3, P16039, Q6DRI7, Q8NI36, Q01780, Q7YRA3, Q9H840, Q9Y3A2, Q8WXD5, Q9NR56, Q91YE6, P62313, Q7SY48, Q2KHT8, P46087, Q5RDW1, Q5R673, Q9CR08, Q9UET6, Q6P0I8, O35130, A2AV36, Q9JKP5, O35900, A0JMQ0, Q14690, Q5PQR5, Q3KRG3, Q9JKX4, Q68FP5, Q12788, Q5XH16, Q6IQU6, Q99700, P56182, Q2KID0, Q3T0Q8, Q8UVY2, Q32LD4, P57678, Q9UI43, Q9NY93, Q9H814, Q7ZVE0,…	3529	134	11157	1.25045	1	0.948652	58.7843
GOTERM_BP_FAT	GO:0002822~regulation of adaptive immune response based on somatic recombination of immune receptors built from immunoglobulin superfamily domains	13	0.257681	0.0462883	A0JPN1, Q9Y275, P20693, Q6A2H4, P23492, Q3ZTK5, P15151, Q03519, Q5ZM39, A0JN71, Q9UDY8, Q12933, P58801	3529	24	11157	1.71249	1	0.948484	59.2283
GOTERM_BP_FAT	GO:0009967~positive regulation of signal transduction	73	1.44698	0.0471006	Q8UVJ6, Q9JJN1, P26009, P49918, O15520, O43657, P35568, P13595, P79832, Q68FR9, P27987, Q04721, P33150, Q9R0G7, Q9ERE4, P06213, O60504, Q06831, Q5M7X9, O15519, Q5RJ80, Q969V5, Q6Q0C0, P21333, Q9H160, Q28178, Q645M6, P17948, P22934, Q7Z434, Q9Y239, P19438, O76093, O95361, P61589, Q2KIB3, O60315, Q99966, P25116, P59511, O89101, P98135, Q5EG71, O54693, Q03014, A7YY44, Q6KF10, Q6R327, Q8CFN2, Q9UDY8,…	3529	192	11157	1.20204	1	0.949206	59.8807
GOTERM_BP_FAT	GO:0001819~positive regulation of cytokine production	18	0.356789	0.0475285	P59046, Q53H80, P29452, Q9JIP4, Q5E9Z7, Q9UDY8, Q12933, P58801, Q7Z434, O13076, Q9Y239, Q6NXY9, O95361, Q3ZTK5, P40189, A0JN71, P20749, Q9H1D9	3529	37	11157	1.53804	1	0.948653	60.2203
GOTERM_BP_FAT	GO:0042330~taxis	32	0.634291	0.0477116	Q92608, O35276, O95715, Q0V8R5, Q14160, O89026, Q8MJW8, O15520, Q2WED0, P18614, O89093, Q13822, P46094, Q96MX0, P11835, Q8HYP5, O88803, P31146, Q5EBF6, Q05144, Q9Y6N7, Q99698, O62657, Q14005, Q04941, O35375, P56199, P10148, P32248, P05696, Q13275, A5A6L1	3529	75	11157	1.34891	1	0.9473	60.3648
GOTERM_BP_FAT	GO:0006935~chemotaxis	32	0.634291	0.0477116	Q92608, O35276, O95715, Q0V8R5, Q14160, O89026, Q8MJW8, O15520, Q2WED0, P18614, O89093, Q13822, P46094, Q96MX0, P11835, Q8HYP5, O88803, P31146, Q5EBF6, Q05144, Q9Y6N7, Q99698, O62657, Q14005, Q04941, O35375, P56199, P10148, P32248, P05696, Q13275, A5A6L1	3529	75	11157	1.34891	1	0.9473	60.3648
GOTERM_BP_FAT	GO:0031589~cell-substrate adhesion	37	0.733399	0.0481797	O54693, Q5H8C1, O94769, P26012, Q13444, Q9H6X2, Q5R7I1, P11835, Q9GLP0, P07942, P98161, P10417, O60504, P31146, Q91V88, Q9BZZ2, P14543, Q14112, P48059, Q62417, Q9CZ52, O54834, Q61739, P05106, Q99JW4, O08523, Q96S53, P11276, Q8TER0, Q5M9B3, P61589, P56199, P07589, Q8JHW2, Q13349, Q9ESS6, Q28295	3529	89	11157	1.31434	1	0.9469	60.732
GOTERM_BP_FAT	GO:0042325~regulation of phosphorylation	115	2.27948	0.0489846	Q8R409, Q9ESN0, P98155, Q80XF5, P54254, Q8CI15, P49918, Q08462, P49796, O18734, Q99683, Q90X67, Q8K3F3, Q9R0G7, Q3V6T2, P06213, P22694, P10417, P59046, Q969V5, Q6Q0C0, Q28178, Q9Y6T7, Q9UGJ0, Q99728, P22413, P49706, P04233, P56199, Q8VE18, A1A5H8, O60315, P46662, Q3UW53, O60583, P39689, P46527, P98135, Q5EG71, Q801G2, O35716, Q9N0J9, Q9UPT6, Q9UDY8, P22387, Q9H422, Q04594, Q02224, Q58A65, P22770,…	3529	316	11157	1.15055	1	0.947609	61.3559
GOTERM_BP_FAT	GO:0035107~appendage morphogenesis	38	0.753221	0.0497026	O88413, Q03112, Q03113, Q92050, P18860, Q68F54, Q90275, Q7TST9, O15520, Q9JKP5, Q9Y5Y0, Q15699, P51532, Q6P0J3, Q9IA31, Q01721, Q90693, Q9NW07, Q04721, Q13099, A1IGX5, O57460, Q9QYP1, P41413, Q28056, P56673, Q9QXN1, Q9NR56, Q68CZ1, O88898, Q9UJQ4, Q7ZUA6, O00238, Q8IMA8, P41778, P21279, O02703, P82471	3529	92	11157	1.30584	1	0.948018	61.9045
GOTERM_CC_FAT	GO:0043232~intracellular non-membrane-bounded organelle	675	13.3796	2.3681e-06	P46940, P34022, Q2NL05, Q641X9, Q8IUG5, B2RTY4, P27816, Q8IVH2, Q922J3, P07737, Q9EQT3, Q3TVI8, Q02084, Q8K2B0, Q8WXH0, Q8UVC1, Q2HJI0, A5PF48, Q62733, Q6NX31, A6QLN9, Q969V4, O77819, O54834, O95983, Q5XIT1, Q568A0, P61589, P67777, Q1LVW0, Q8K4R9, Q8BKT8, Q8BJS4, Q0V967, O95886, P47904, Q7ZVR1, Q9CYC5, P97499, Q6AYK5, Q791N7, Q9Y6G3, Q2YDF6, Q8VCX6, Q13643, P19352, Q66I67, Q8VHJ5, P55859, Q26630,…	3151	1894	10116	1.14415	0.00167521	0.00167521	0.00357661
GOTERM_CC_FAT	GO:0043228~non-membrane-bounded organelle	675	13.3796	2.3681e-06	P46940, P34022, Q2NL05, Q641X9, Q8IUG5, B2RTY4, P27816, Q8IVH2, Q922J3, P07737, Q9EQT3, Q3TVI8, Q02084, Q8K2B0, Q8WXH0, Q8UVC1, Q2HJI0, A5PF48, Q62733, Q6NX31, A6QLN9, Q969V4, O77819, O54834, O95983, Q5XIT1, Q568A0, P61589, P67777, Q1LVW0, Q8K4R9, Q8BKT8, Q8BJS4, Q0V967, O95886, P47904, Q7ZVR1, Q9CYC5, P97499, Q6AYK5, Q791N7, Q9Y6G3, Q2YDF6, Q8VCX6, Q13643, P19352, Q66I67, Q8VHJ5, P55859, Q26630,…	3151	1894	10116	1.14415	0.00167521	0.00167521	0.00357661
GOTERM_CC_FAT	GO:0000775~chromosome, centromeric region	48	0.951437	2.38666e-05	Q9CYC5, Q1T769, Q13257, Q5XGL1, Q9CPV5, Q1T765, Q1T764, Q8NG31, Q8NFH3, Q8NFH4, Q96R06, Q08E31, Q28BZ7, O43264, O54864, Q6NYW6, O43482, Q02224, Q32LC9, Q7ZW63, Q7ZZC6, P45973, Q8AYS7, Q5R481, Q28ER3, Q3UA16, Q5XLR4, A2BGR3, O43683, O88509, Q9H3R5, P52948, Q1LV50, Q0IHP2, Q6DRD4, Q503N2, Q60520, Q9CXH7, Q9NRZ9, P67777, Q58EL7, Q9CZJ6, Q96IY1, Q6DHG8, Q96MW7, B5X5N3, Q6DRJ7, Q5R6X7	3151	90	10116	1.71222	0.0167558	0.00841327	0.0360409
GOTERM_CC_FAT	GO:0000313~organellar ribosome	21	0.416254	3.06913e-05	Q9NYK5, Q8K2M0, Q9NVS2, Q9Y6G3, Q2YDF6, Q9DB15, Q5BJJ8, Q9Y2R5, Q99N91, Q5BJB7, P83565, P51398, Q9H0U6, Q95KE5, Q3T0J3, A6QPQ5, Q502B0, Q502C1, P0C2B8, P82911, Q9CXW2	3151	29	10116	2.32478	0.0214954	0.00721709	0.0463447
GOTERM_CC_FAT	GO:0005761~mitochondrial ribosome	21	0.416254	3.06913e-05	Q9NYK5, Q8K2M0, Q9NVS2, Q9Y6G3, Q2YDF6, Q9DB15, Q5BJJ8, Q9Y2R5, Q99N91, Q5BJB7, P83565, P51398, Q9H0U6, Q95KE5, Q3T0J3, A6QPQ5, Q502B0, Q502C1, P0C2B8, P82911, Q9CXW2	3151	29	10116	2.32478	0.0214954	0.00721709	0.0463447
GOTERM_CC_FAT	GO:0044420~extracellular matrix part	58	1.14965	4.88165e-05	Q8NDA2, P98088, Q4FZX7, P20908, O95428, Q5H8C1, Q9JI33, Q3U962, Q99715, P42263, Q8JHV6, O35206, O46392, P02457, P49961, P98160, Q80YX1, P10039, P14543, A6QLN9, P08122, P11276, P24043, P27424, O88207, P55002, Q9H4F8, Q16787, P25318, Q8AVH7, P27006, Q63870, A0MSJ1, Q5SZK8, P51693, Q2UY09, Q17RW2, P17785, P97857, P07942, P51890, Q86XX4, Q9N281, Q2KI80, Q91V88, Q14112, P33072, Q03001, Q16363, O75445,…	3151	117	10116	1.59148	0.0339725	0.00860351	0.0737049
GOTERM_CC_FAT	GO:0005739~mitochondrion	364	7.21506	5.2651e-05	Q641X9, Q8R0F8, P84173, Q78IK4, Q2TBI6, Q1LZ96, Q8BRC6, Q5IFP1, Q9XSA7, Q95KE5, O57535, Q4FZT8, Q2HJI0, Q16822, Q6NWD4, P10619, Q9NYK5, Q9N0F3, Q1RLY6, Q9UHN1, Q969V5, Q3ZBL5, Q8R2V5, P55198, P19483, Q7Z434, Q8IVH4, P61589, Q8WV74, Q6NYZ6, O43772, P10790, Q9Y6G3, Q08CK1, Q86WA6, Q2YDF6, P83095, Q922H2, Q8R361, Q8K126, Q8TEA8, P51398, Q9BSH4, A6QPQ5, B1AR13, Q58EB4, Q9BZ23, P59480, Q6PBH5, Q8VEM8,…	3151	990	10116	1.18039	0.0365916	0.00742785	0.0794922
GOTERM_CC_FAT	GO:0000779~condensed chromosome, centromeric region	27	0.535183	6.60964e-05	Q1T769, Q9CYC5, Q9CPV5, Q13257, Q8NG31, Q8NFH3, Q96R06, Q8NFH4, Q28BZ7, Q08E31, O43264, Q6NYW6, Q02224, Q7ZW63, Q5R481, Q3UA16, A2BGR3, O43683, Q9H3R5, Q503N2, Q9CXH7, Q58EL7, Q96IY1, Q6DHG8, B5X5N3, Q5R6X7, Q6DRJ7	3151	43	10116	2.01584	0.0457196	0.00776929	0.0997825
GOTERM_CC_FAT	GO:0000777~condensed chromosome kinetochore	24	0.475719	0.000170227	Q9CYC5, Q1T769, Q9CPV5, Q13257, O43683, Q8NG31, Q9H3R5, Q8NFH3, Q96R06, Q8NFH4, Q28BZ7, O43264, Q6NYW6, Q02224, Q503N2, Q7ZW63, Q58EL7, Q5R481, Q96IY1, Q3UA16, Q6DHG8, B5X5N3, Q6DRJ7, A2BGR3	3151	38	10116	2.02763	0.113551	0.0170713	0.256795
GOTERM_CC_FAT	GO:0000793~condensed chromosome	39	0.773043	0.000315404	Q9CYC5, Q1T769, Q9UEY8, Q13257, Q9CPV5, Q9BXW9, Q8WZ42, Q8NG31, P40692, Q8NFH3, O14924, Q8NFH4, Q96R06, Q28BZ7, Q08E31, O43264, Q6NYW6, Q02224, Q7ZW63, Q5R481, Q3UA16, A2BGR3, Q6PIF2, O43683, P51955, P18754, Q9H3R5, Q503N2, P42695, Q9CXH7, Q58EL7, P26584, Q8BJS4, Q96IY1, Q06609, Q6DHG8, B5X5N3, Q6DRJ7, Q5R6X7	3151	75	10116	1.66941	0.200158	0.0275316	0.475314
GOTERM_CC_FAT	GO:0005604~basement membrane	43	0.852329	0.000586832	Q16787, Q8NDA2, Q8AVH7, P25318, Q4FZX7, P20908, P27006, Q63870, O95428, Q5H8C1, Q9JI33, Q8JHV6, Q5SZK8, P51693, O35206, Q2UY09, P49961, P17785, P07942, P97857, P98160, Q86XX4, P10039, Q80YX1, Q9N281, Q2KI80, Q91V88, P14543, Q14112, A6QLN9, Q03001, Q16363, O75445, P08122, P11276, A6H6E2, P24043, Q7SIB2, O88207, P07589, O95631, Q9H4F8, Q9HB63	3151	87	10116	1.58675	0.340055	0.0451277	0.882666
GOTERM_CC_FAT	GO:0031012~extracellular matrix	134	2.6561	0.000909022	P32018, P98088, Q92050, O46542, Q99715, P32017, Q8JHV6, P42263, P48834, O35206, O95450, Q9BXX0, P02457, Q7RTW8, Q2TNK5, Q06000, P50281, P98160, Q80WM5, A6QLN9, Q9P2N4, Q00918, P11276, P24043, P27424, P55002, Q15063, Q8TE56, Q8TE57, P59511, Q8K482, Q16787, Q8AVH7, Q24JV9, P27006, P98133, O94769, Q62894, Q2UY09, Q17RW2, P17785, Q90X49, P07942, Q91V88, Q99542, Q15582, O08523, Q90953, P20785, P07589,…	3151	340	10116	1.26528	0.47475	0.0623589	1.36418
GOTERM_CC_FAT	GO:0044427~chromosomal part	97	1.9227	0.000911194	Q9CPV5, P52701, P35244, Q9WUK4, P35249, Q08E31, P51532, O43482, Q02084, A2BGR3, Q62733, P30664, Q6DIH3, Q6NX31, Q00577, Q9H3R5, O95983, P67777, Q1LVW0, Q8BJS4, B5X5N3, Q96MW7, P97499, Q1T769, Q9CYC5, P54274, Q1T765, Q1T764, P40692, Q28BZ7, O43264, Q02224, Q8AYS7, Q3UA16, Q924W6, Q3HNG7, Q5XLR4, Q8AWD1, Q8AYC9, Q8TAQ2, O55187, P18754, Q9Z2D6, P33610, Q9QXV1, Q9NRG0, Q6GM86, Q60520, Q58EL7, Q6DHG8,…	3151	235	10116	1.32515	0.475557	0.0569863	1.36742
GOTERM_CC_FAT	GO:0005840~ribosome	67	1.32805	0.0010829	Q641X9, Q2TBI6, Q9DB15, Q5BJJ8, O35680, Q6PBR7, Q5RK00, P16039, Q95KE5, Q2HJI0, Q503X2, Q9NYK5, Q8K2M0, A6QLN9, Q6AXT0, Q4V8H8, Q5SPH9, Q9CQ40, Q0VFH6, P21531, Q58DQ5, Q9H0U6, Q3T0J3, P82931, P47904, Q502C1, Q9NRX2, Q9CXW2, P82926, P82925, P82924, Q9Y6G3, P82929, Q2YDF6, Q15349, Q9Y2R5, P84100, Q5T653, P51398, A6QPQ5, P59480, P52293, Q502B0, Q2KIS2, P79386, P0C2B8, Q6DGM3, Q1LXI5, P58059, Q32PC3,…	3151	153	10116	1.40587	0.535647	0.0619255	1.62314
GOTERM_CC_FAT	GO:0005578~proteinaceous extracellular matrix	129	2.55699	0.00162984	P32018, P98088, Q92050, O46542, Q99715, P32017, Q8JHV6, P48834, O35206, O95450, Q9BXX0, P02457, Q7RTW8, Q2TNK5, P50281, P98160, Q80WM5, A6QLN9, Q9P2N4, Q00918, P11276, P24043, P27424, P55002, Q15063, Q8TE56, Q8TE57, P59511, Q8K482, Q16787, Q8AVH7, Q24JV9, P27006, P98133, O94769, Q62894, Q2UY09, Q17RW2, P17785, Q90X49, P07942, Q91V88, Q99542, Q15582, O08523, Q90953, P20785, P07589, O95631, Q9UNA0,…	3151	330	10116	1.25498	0.6849	0.0850042	2.43354
GOTERM_CC_FAT	GO:0033279~ribosomal subunit	25	0.49554	0.00339329	Q9NVS2, Q9Y6G3, Q498Z6, Q2TBI6, Q2YDF6, Q5BJJ8, Q9Y2R5, Q4V8H8, O35680, P84100, Q99N91, P16039, Q5BJB7, Q0VFH6, P51398, Q95KE5, Q3T0J3, Q924T2, A6QPQ5, Q502B0, Q502C1, P0C2B8, Q6DGM3, P82911, Q9CXW2	3151	47	10116	1.70766	0.909873	0.157933	5.00423
GOTERM_CC_FAT	GO:0031981~nuclear lumen	325	6.44202	0.00370619	P46940, Q8NCE0, Q29122, Q6PBV6, Q1LZ96, Q60722, Q9I8V2, Q9Z2U4, Q9UKG1, O75496, Q8IVH2, O43482, Q8K2B0, Q02080, Q9GKQ9, P55212, P97762, Q8WUI4, P52435, Q6NX31, Q4V8H8, P46937, Q8NBF1, Q80UU2, O95983, Q5R8H5, Q9UGJ0, Q7Z6E9, P46087, Q568A0, Q9CR08, P41778, Q0VIA1, Q08BY1, Q8CB77, Q9NS56, Q76KJ5, O00410, Q7ZVR1, Q5ZKY4, P97499, Q6AYK5, Q791N7, Q05B56, Q9Z2V6, Q924A0, Q1RML7, Q12788, Q5XH16, P07222,…	3151	923	10116	1.13043	0.927839	0.160759	5.45371
GOTERM_CC_FAT	GO:0015629~actin cytoskeleton	94	1.86323	0.00518537	Q1L8T5, P46940, Q9UPN3, Q01082, O14745, Q8N3V7, Q8IUG5, Q29122, O60890, P82159, B2RTY4, Q9ULV4, Q3ZBI6, Q7TNB2, Q9P202, Q91YM2, Q8NFW9, Q9Y4I1, P07737, Q9EQT3, Q64119, Q61233, Q8R1S4, P53355, Q62261, O43586, Q80T11, O43312, A5PF48, Q8VHX6, P31146, A2ASS6, Q9Y6X6, P32851, P21333, P70402, O54834, Q64727, P82160, Q9BQL6, Q04584, P35580, O95198, Q5E9E2, Q91Z83, P02609, Q61879, Q6H8Q1, P20929, Q92747,…	3151	238	10116	1.26798	0.974797	0.205506	7.55176
GOTERM_CC_FAT	GO:0005694~chromosome	115	2.27948	0.00686155	Q9CPV5, Q9BXW9, P52701, P35244, Q9WUK4, P35249, Q08E31, P51532, O43482, Q02084, A2BGR3, Q6P026, Q62733, P30664, Q6DIH3, Q6NX31, Q00577, Q9UHN1, Q9H3R5, O95983, Q1LVW0, P67777, Q2Z1W2, Q8BJS4, Q96MW7, B5X5N3, Q1T769, P97499, Q9UEY8, Q9CYC5, Q1T765, P54274, Q1T764, P40692, O14924, Q28BZ7, O43264, Q02224, Q8AYS7, Q3UA16, Q924W6, Q3HNG7, Q5XLR4, Q8AWD1, Q80YR7, Q8AYC9, Q071E0, Q8TAQ2, O55187, P18754,…	3151	301	10116	1.22657	0.992363	0.249299	9.87666
GOTERM_CC_FAT	GO:0030529~ribonucleoprotein complex	147	2.91378	0.00759168	Q9NWZ8, Q641X9, Q2TBI6, Q6PBV6, Q9H5Z1, O35680, P50580, Q95KE5, Q2HJI0, Q503X2, Q9WTY1, Q9BUJ2, Q9H840, O75817, Q9NYK5, Q99020, Q13151, Q9D0W5, A6QLN9, Q6AXT0, Q4V8H8, P17844, Q5SPH9, Q9BWJ5, Q0VFH6, Q9CR08, P82931, P47904, O15116, Q9CXW2, P82926, P82925, P97499, P82924, Q9Y6G3, P82929, Q2YDF6, Q1LVE8, P0C218, Q7ZUG0, Q8BZX4, Q502M5, P51398, Q12788, A6QPQ5, Q5XH16, P59480, Q2KIS2, Q62376, P57724,…	3151	396	10116	1.19174	0.995463	0.258993	10.8722
GOTERM_CC_FAT	GO:0005730~nucleolus	151	2.99306	0.00770902	P46940, Q01082, Q8NCE0, P49918, Q6PBV6, Q5BLF0, Q14146, P50580, Q9CSH3, Q9BSV6, Q8IVH2, O95453, Q9IA31, Q8K2B0, Q6DRI7, Q7YRA3, Q6ZVD7, O75817, P17844, Q8NBF1, Q80UU2, Q4V8H8, Q9H6R0, O15516, Q7Z6E9, P46087, P41970, Q568A0, Q5R673, Q9CR08, O42584, Q6P0I8, O35130, O60583, Q76KJ5, Q8NHM5, O00410, Q7ZVR1, Q6AYK5, Q791N7, Q5RDN9, Q9Y253, Q9Y2W1, Q9JKX4, O00268, Q1RML7, Q12788, Q5XH16, P07222, Q4V9P9,…	3151	408	10116	1.18817	0.995827	0.25052	11.0312
GOTERM_CC_FAT	GO:0005819~spindle	48	0.951437	0.00970375	Q9NS23, Q13257, Q9NZ50, Q96CS2, P54274, P36405, Q12834, A4QP72, Q96R06, Q13163, Q28BZ7, P16039, O43264, Q8TEW0, Q6NYW6, Q02224, Q99741, P10587, Q15058, Q5BKN4, Q8NHV4, P50995, Q5R481, A2AJI0, O08773, Q8R349, Q9D786, A1L2F3, O15344, O43683, O43663, P51955, Q15013, Q14511, Q0IHP2, Q91819, Q02241, Q9H0H5, P35580, P67777, Q58EL7, Q8K4R9, Q8BKT8, Q0V967, Q6DHG8, B5X5N3, Q61879, Q5R6X7	3151	112	10116	1.37589	0.998996	0.291914	13.6945
GOTERM_CC_FAT	GO:0044421~extracellular region part	230	4.55897	0.0114797	P98155, P04114, P98088, P98158, O46542, O35206, Q9Y5X9, P98093, P98160, Q80WM5, P98164, Q62867, O00214, A6QLN9, Q03591, Q9P2N4, Q9UKU9, Q5R4N8, O62657, P24043, P22413, P27424, Q15063, Q96PB7, P43432, P98135, P63306, P27006, P98133, Q62894, Q2UY09, Q17RW2, Q90X49, P17785, P07942, Q9YGD3, Q3UZZ4, Q91V88, Q99542, Q15582, O08523, Q90953, P06396, Q9BUR5, O95631, Q9UNA0, Q9HCB6, Q13224, Q9UP79, Q9XTA3,…	3151	650	10116	1.13599	0.999718	0.322448	16.0028
GOTERM_CC_FAT	GO:0000776~kinetochore	27	0.535183	0.0114932	Q1T769, Q9CYC5, Q9CPV5, Q13257, Q8NG31, Q8NFH3, Q96R06, Q8NFH4, Q28BZ7, O43264, Q6NYW6, Q02224, Q7ZW63, P45973, Q5R481, Q3UA16, A2BGR3, O43683, Q9H3R5, P52948, Q503N2, Q60520, Q58EL7, Q96IY1, Q6DHG8, B5X5N3, Q6DRJ7	3151	56	10116	1.54788	0.999721	0.310656	16.0202
GOTERM_CC_FAT	GO:0005856~cytoskeleton	378	7.49257	0.0146197	P46940, Q8WWW0, P34022, Q2NL05, Q9BVG8, Q8IUG5, Q29122, A5WUN7, B2RTY4, P27816, Q3B7N2, Q922J3, P07737, Q9EQT3, Q3TVI8, Q8UVC1, Q8WXH0, A2AJI0, O43586, A5PF48, Q8VHX6, O60504, Q8TBB0, Q9C0D5, Q80YT7, Q969V4, Q5T4S7, O54834, O77819, Q5XIT1, A8WFU8, Q28626, P61589, P67777, Q91Z83, O93510, Q8K4R9, Q8BKT8, Q58EE9, Q0V967, P46662, O95886, Q8C1B1, Q61879, Q9UEY8, P82347, Q00587, Q13643, P19352, Q8VHJ5,…	3151	1107	10116	1.09624	0.99997	0.364506	19.9436
GOTERM_CC_FAT	GO:0070161~anchoring junction	61	1.20912	0.0172184	Q9EQT3, Q5R7I1, O55111, P28827, O60504, P34152, P08037, Q3SWY2, Q9Y446, P15924, Q90Y50, Q99569, Q8BIW1, P48059, Q8WWI1, Q68CZ2, Q6P0D7, O00560, Q5F464, P97350, Q99JW4, Q64727, Q61739, Q9BQL6, Q04584, O35889, P46662, Q9HBL0, Q155Q3, Q16787, Q9QZQ1, Q14160, Q8CGB6, Q9Y4G6, Q8TEW0, Q5RKG2, Q9HBI1, A6X8Z5, A5D7J5, P56945, Q7ZXE9, P12003, Q9HCM4, Q8QFP8, Q14258, Q07157, P22735, Q674X7, Q9QXN0, Q62417,…	3151	152	10116	1.28839	0.999995	0.400923	23.0738
GOTERM_CC_FAT	GO:0044451~nucleoplasm part	150	2.97324	0.0177422	Q9NWZ8, P54254, Q29122, Q99814, Q5E9Z7, Q1LZ96, Q9Z2U4, Q64318, Q60722, Q9I8V2, P84023, Q9UKG1, P97831, O43482, Q9IA31, P56545, Q02080, Q9D7M8, P49715, Q9H840, Q96JK9, Q9Y2D1, Q9GKQ9, P97762, Q8WUI4, P61969, P30664, P52435, Q6DIH3, Q6NX31, Q9W734, P46937, O95983, Q5R8H5, O15516, P41778, Q8IMA8, Q0VIA1, Q08BY1, Q8CB77, Q8VCP8, Q9NS56, Q5ZKY4, Q90ZE2, Q8VI33, Q05B56, Q9Y2W1, O88904, Q924A0, Q9Z2V6,…	3151	414	10116	1.16319	0.999997	0.397683	23.6908
GOTERM_CC_FAT	GO:0015934~large ribosomal subunit	15	0.297324	0.0198033	Q2TBI6, Q5BJJ8, Q4V8H8, P84100, Q99N91, P16039, Q5BJB7, Q0VFH6, Q95KE5, Q3T0J3, A6QPQ5, Q502B0, Q502C1, P0C2B8, Q6DGM3	3151	27	10116	1.78356	0.999999	0.419967	26.0737
GOTERM_CC_FAT	GO:0005762~mitochondrial large ribosomal subunit	9	0.178394	0.0228732	Q3T0J3, Q95KE5, A6QPQ5, Q5BJJ8, Q502B0, Q99N91, Q502C1, Q5BJB7, P0C2B8	3151	13	10116	2.22259	1	0.454882	29.4945
GOTERM_CC_FAT	GO:0000315~organellar large ribosomal subunit	9	0.178394	0.0228732	Q3T0J3, Q95KE5, A6QPQ5, Q5BJJ8, Q502B0, Q99N91, Q502C1, Q5BJB7, P0C2B8	3151	13	10116	2.22259	1	0.454882	29.4945
GOTERM_CC_FAT	GO:0008305~integrin complex	15	0.297324	0.0284762	P26009, Q13797, Q61739, P05106, P18614, P26012, Q5M9B3, Q9QXH4, Q63258, Q06274, P56199, Q00651, P11835, Q13349, Q9GLP0	3151	28	10116	1.71986	1	0.518328	35.3598
GOTERM_CC_FAT	GO:0031974~membrane-enclosed lumen	411	8.14668	0.0292596	P46940, Q1LZ96, Q9I8V2, Q9Z2U4, Q60722, Q9UKG1, O75496, Q8IVH2, Q8K2B0, Q02080, Q9GKQ9, P97762, Q9N0F3, Q8WUI4, P52435, Q6NX31, P46937, O95983, Q9UGJ0, Q568A0, P41778, Q08BY1, Q0VIA1, Q8CB77, Q5ZKY4, Q7ZVR1, Q62703, P97499, Q9Y6G3, Q791N7, Q6AYK5, Q2YDF6, Q922H2, Q8TEA8, P13667, Q9Z2V6, P51398, P07222, P07221, P22674, Q969X6, Q9H7H0, Q9NTG7, Q8TAQ2, Q99PE9, Q9NP71, P83871, O75486, Q9NY93, P26584,…	3151	1223	10116	1.07889	1	0.515674	36.1426
GOTERM_CC_FAT	GO:0070013~intracellular organelle lumen	396	7.84936	0.0357611	P46940, Q1LZ96, Q9I8V2, Q9Z2U4, Q60722, Q9UKG1, O75496, Q8IVH2, Q8K2B0, Q02080, Q9GKQ9, P97762, Q9N0F3, Q8WUI4, P52435, Q6NX31, P46937, O95983, Q9UGJ0, Q568A0, P41778, Q08BY1, Q0VIA1, Q8CB77, Q5ZKY4, Q7ZVR1, Q62703, P97499, Q9Y6G3, Q791N7, Q6AYK5, Q2YDF6, Q922H2, Q8TEA8, P13667, Q9Z2V6, P51398, P07222, P07221, P22674, Q969X6, Q9H7H0, Q9NTG7, Q8TAQ2, Q99PE9, Q9NP71, P83871, O75486, Q9NY93, P26584,…	3151	1181	10116	1.07648	1	0.576593	42.3058
GOTERM_CC_FAT	GO:0001726~ruffle	31	0.61447	0.037592	O14745, P26990, P59644, Q5U1Y1, Q29122, Q99K30, Q9UQB8, Q9Y4G6, Q9JHL4, Q01406, Q9Y4I1, P56945, Q6ZV73, O57535, Q61233, O08808, Q5ZM14, Q00534, Q9CQD1, O43312, Q9JMC1, P52734, O08967, P04631, Q5EAD0, P49025, A6H7G2, P46662, Q4KM33, Q6ZNL6, Q96DR7	3151	72	10116	1.38226	1	0.583182	43.9384
GOTERM_CC_FAT	GO:0015630~microtubule cytoskeleton	161	3.19128	0.0387001	Q9UPN3, Q8WWW0, Q9NZ50, P34022, Q2NL05, Q9BVG8, P36405, A5WUN7, Q12834, P27816, Q922J3, Q1LY10, Q3TVI8, A2AJI0, Q8TBB0, O75410, Q80YT7, Q969V4, Q6A065, Q15013, O77819, Q5XIT1, A8WFU8, Q6AXS8, Q9H0H5, P67777, Q8K4R9, Q8BKT8, Q0V967, Q9BXW4, O60784, Q8C1B1, B5X5N3, Q61879, P54274, Q32P44, Q66I67, Q28BZ7, O43264, A5D8S0, Q26630, Q02224, P30042, P10587, Q7ZXP1, Q8NHV4, P50995, Q13099, Q2TBN3, Q5ZKV8,…	3151	457	10116	1.13102	1	0.582408	44.9055
GOTERM_CC_FAT	GO:0016323~basolateral plasma membrane	65	1.2884	0.0454458	Q9UPN3, Q9UEW8, Q4FZX7, P46896, Q9EQT3, Q5R7I1, P55011, Q29S00, O35450, Q80ZA5, O60504, P34152, P08037, Q3SWY2, P15924, Q8BIW1, P48059, Q68CZ2, P26038, P17809, O00560, Q5F464, Q99JW5, Q99JW4, Q64727, Q61739, Q9BQL6, Q04584, P22413, Q12955, Q5REL2, P50279, Q9HBL0, P27674, Q155Q3, P26041, Q16787, O70589, Q8CGB6, Q6NXB2, Q9Y4G6, Q5RKG2, Q9HBI1, A6X8Z5, A5D7J5, P56945, Q7ZXE9, Q32LP4, P48995, P12003,…	3151	171	10116	1.22033	1	0.631336	50.4644
GOTERM_CC_FAT	GO:0005912~adherens junction	53	1.05055	0.0457657	Q9EQT3, Q5R7I1, P28827, P34152, O60504, Q3SWY2, P15924, Q90Y50, Q8BIW1, P48059, Q8WWI1, Q68CZ2, Q6P0D7, O00560, Q5F464, Q64727, Q61739, Q99JW4, Q9BQL6, Q04584, O35889, Q9HBL0, P46662, Q155Q3, Q16787, Q9QZQ1, Q14160, Q8CGB6, Q9Y4G6, Q8TEW0, Q5RKG2, Q9HBI1, A6X8Z5, A5D7J5, P56945, Q7ZXE9, P12003, Q9HCM4, Q14258, Q8QFP8, P22735, Q07157, Q9QXN0, Q62417, Q61792, Q9JKF6, P32507, Q14511, Q804T6, A2ALU4,…	3151	136	10116	1.25112	1	0.622996	50.7146
GOTERM_CC_FAT	GO:0043233~organelle lumen	398	7.889	0.0463696	P46940, Q1LZ96, Q9I8V2, Q9Z2U4, Q60722, Q9UKG1, O75496, Q8IVH2, Q8K2B0, Q02080, Q9GKQ9, P97762, Q9N0F3, Q8WUI4, P52435, Q6NX31, P46937, O95983, Q9UGJ0, Q568A0, P41778, Q08BY1, Q0VIA1, Q8CB77, Q5ZKY4, Q7ZVR1, Q62703, P97499, Q9Y6G3, Q791N7, Q6AYK5, Q2YDF6, Q922H2, Q8TEA8, P13667, Q9Z2V6, P51398, P07222, P07221, P22674, Q969X6, Q9H7H0, Q9NTG7, Q8TAQ2, Q99PE9, Q9NP71, P83871, O75486, Q9NY93, P26584,…	3151	1193	10116	1.07103	1	0.617273	51.1836
GOTERM_CC_FAT	GO:0016459~myosin complex	32	0.634291	0.0469072	Q1L8T5, Q05623, Q29122, Q8IUG5, P82159, B2RTY4, Q9Y4I1, Q9Z1N3, P10587, Q64119, P16419, Q8WXR4, A5PF48, Q9UKN7, O94832, A2ASS6, Q9HD67, Q5R844, Q9Y6X6, P70402, P97479, P82160, P52179, P35580, Q90688, Q02045, Q78P75, Q91Z83, Q5E9E2, O43795, P02609, Q61879	3151	76	10116	1.35175	1	0.611261	51.5976
GOTERM_CC_FAT	GO:0005654~nucleoplasm	195	3.86521	0.0480372	Q9NWZ8, P51531, Q9BXW9, P54254, Q29122, Q99814, Q12834, Q5BLF0, P35244, Q5E9Z7, Q1LZ96, Q64318, Q60722, Q9I8V2, Q9Z2U4, P35249, P84023, Q9UKG1, O75496, Q9IA31, O43482, P97831, P56545, Q02080, Q9D7M8, Q9Y2D1, P49715, Q9H840, Q96JK9, Q9GKQ9, P55212, P97762, Q8WUI4, P61969, P30664, Q6DIH3, Q99828, P52435, Q6NX31, Q9W734, P46937, O95983, P20248, Q5R8H5, Q9UGJ0, O15516, Q8IMA8, P41778, Q0VIA1, Q08BY1,…	3151	564	10116	1.10998	1	0.610157	52.4571
GOTERM_CC_FAT	GO:0005913~cell-cell adherens junction	17	0.336967	0.0493412	Q9QZQ1, P15924, Q62417, Q8WWI1, Q14160, Q9JKF6, P32507, Q61739, Q64727, A2ALU4, Q04584, Q8TEW0, O35889, P28827, P12003, Q07157, P22735	3151	35	10116	1.55934	1	0.610449	53.4313
GOTERM_MF_FAT	GO:0046982~protein heterodimerization activity	68	1.34787	0.000192535	Q6TMG5, P04114, Q99814, O89026, Q6NZL8, Q64319, P16039, Q8IVH2, P79832, P18614, Q15699, Q9UKT9, Q9Z1P3, Q04721, Q63258, P10417, P07323, Q9Y6N7, P32851, Q6P9V9, O00560, Q99728, P50572, P20595, P55347, P62313, P04839, O08839, P56199, P67777, P23204, P41778, Q91Z83, P04632, Q9JJ73, P43432, Q8C208, Q9R1X4, P54274, O14920, Q8AVU4, Q9DG12, Q3T013, Q03519, P29274, Q5U2R1, Q6PBD4, P48508, P11835, Q63665,…	3355	147	10694	1.47448	0.284693	0.284693	0.325148
GOTERM_MF_FAT	GO:0008270~zinc ion binding	636	12.6065	0.000617513	Q8N1W1, Q9Y6I4, P60323, Q9R1V4, Q9PTJ3, Q7TSV3, B2RTY4, Q5RIV4, Q8BW72, Q8IVH2, Q922J3, Q6PAF4, Q9C040, Q6KAS7, Q02084, Q8BM47, Q8K4Q6, Q7SYK1, Q5R8X1, Q2YDC9, P19382, P97762, Q6NX31, Q95N78, Q969V5, Q8WWI1, Q86WB0, Q8R2V5, O77819, Q5HZL1, P55198, Q8BP31, Q61097, P12890, Q5ZK62, P20417, Q68EI3, Q8R173, Q8NFT6, Q24K02, Q0V967, P47904, P39689, Q9WTZ1, Q5ZKY4, P27046, Q5XGB9, Q5XHB4, Q7TMI3, Q6AYK5,…	3355	1836	10694	1.10416	0.658635	0.415736	1.03932
GOTERM_MF_FAT	GO:0030695~GTPase regulator activity	156	3.09217	0.00138	P46940, Q8N1W1, P34022, Q803Q4, O60890, B2RTY4, Q5VT25, Q3UIA2, Q5RHR6, Q86UR5, Q9NZL6, Q96PX9, O97902, P19803, P49796, P11274, A5PF44, Q03385, Q8BPM2, Q6IR34, A2ASS6, Q8VHQ7, Q9HCH5, Q8R2V5, O54834, Q9ULL1, Q9H0H5, Q9P2F6, Q5VWQ8, Q5ZK62, Q9UJM3, Q13009, Q9P2F8, Q8VDV3, Q8IW93, O00410, Q1LUA6, Q92608, Q812A5, Q9P227, B5DFA1, Q5DU25, Q9NU19, Q86VW2, Q5ZMV8, Q12851, Q14161, O14924, Q9NZN5, P58802,…	3355	404	10694	1.23081	0.909541	0.5511	2.30862
GOTERM_MF_FAT	GO:0005096~GTPase activator activity	88	1.7443	0.00167669	Q9NYF5, P46940, P34022, Q8IV61, Q803Q4, O60890, B2RTY4, Q5RHR6, Q3UIA2, A4FUG8, Q91YM2, P19803, Q80U12, O97902, Q99K28, P49796, Q6GYQ0, P11274, A5PF44, O08773, Q923Q2, Q6IR34, Q8TDY4, A2AWA9, Q8R2V5, O54834, A4IF90, Q9H0H5, Q9P2F6, Q5VWQ8, Q3UHD9, Q5ZK62, Q9UJM3, Q6PGG2, Q9JL25, Q80Y19, Q9P2F8, Q80XC3, Q8IW93, Q68EM7, Q92608, A3KGB4, Q812A5, Q9P227, Q8IV04, Q2TA45, B5DFA1, Q6PCS4, Q9NU19, Q14161,…	3355	212	10694	1.32311	0.94606	0.518078	2.79836
GOTERM_MF_FAT	GO:0060589~nucleoside-triphosphatase regulator activity	157	3.11199	0.00198825	P46940, Q8N1W1, P34022, Q803Q4, O60890, B2RTY4, Q5VT25, Q3UIA2, Q5RHR6, Q86UR5, Q9NZL6, Q96PX9, O97902, P19803, P49796, P11274, A5PF44, Q03385, Q8BPM2, Q6IR34, A2ASS6, Q8VHQ7, Q9HCH5, Q8R2V5, O54834, Q9ULL1, Q9H0H5, Q9P2F6, Q5VWQ8, Q5ZK62, Q9UJM3, Q13009, Q9P2F8, Q8VDV3, Q8IW93, O00410, Q1LUA6, Q92608, Q812A5, Q9P227, B5DFA1, Q5DU25, Q9NU19, Q86VW2, Q5ZMV8, Q12851, Q14161, O14924, Q9NZN5, P58802,…	3355	410	10694	1.22057	0.968664	0.499726	3.31016
GOTERM_MF_FAT	GO:0008173~RNA methyltransferase activity	13	0.257681	0.00217983	Q9UI43, Q2KHT8, Q13395, O14717, Q5XJ57, Q9NXH9, A4QP75, A4IGH4, Q6IN84, Q32LD4, Q1HFZ0, Q566V3, Q503J2	3355	18	10694	2.30207	0.977563	0.468919	3.62361
GOTERM_MF_FAT	GO:0003779~actin binding	130	2.57681	0.00223537	Q765P7, Q9UPN3, Q01082, Q8N3V7, Q8IUG5, O60890, Q29122, Q9ULV4, B2RTY4, Q6ZPF4, Q3B7N2, Q9Y4I1, Q96PY5, P07737, Q8WXH0, Q90738, Q76I76, O43586, Q3V6T2, O43312, A5PF48, Q8VHX6, Q9C0D6, P31146, Q8WWI1, Q4FZC9, Q64727, Q5DTJ9, Q28626, Q6GLU8, O95198, Q91Z83, O93510, Q28824, O95466, Q61879, Q5RFN6, Q9UEY8, Q8VCX6, Q13643, P19352, Q9JHL4, Q9Y4G6, P97814, P10587, O14639, Q9CYT6, P16419, P53814, O88801,…	3355	333	10694	1.24436	0.979634	0.426657	3.7143
GOTERM_MF_FAT	GO:0004549~tRNA-specific ribonuclease activity	10	0.198216	0.0023871	Q3SZ21, Q9CR08, Q8NCE0, Q5BJI6, Q8R040, Q80UU2, Q99575, Q9BSV6, O75817, Q5RB79	3355	12	10694	2.65623	0.984369	0.405369	3.96165
GOTERM_MF_FAT	GO:0008047~enzyme activator activity	109	2.16056	0.00439745	P46940, P34022, Q803Q4, O60890, B2RTY4, Q5RHR6, Q3UIA2, O97902, P19803, P49796, P11274, Q99683, O88664, A5PF44, P79881, P50281, Q6IR34, P10619, P59046, Q8R2V5, O54834, P11276, Q9UGJ0, Q9Y239, Q9H0H5, Q9P2F6, Q5ZK62, Q5VWQ8, Q9UJM3, Q9P2F8, Q8IW93, Q92608, Q812A5, Q9P227, P54274, B5DFA1, Q9NU19, Q5ZMV8, Q14161, O14924, Q9UDY8, Q9NZN5, Q14644, P58802, Q5S007, Q86X10, Q70Z35, Q8TB24, A7E300, Q17QN0,…	3355	278	10694	1.24977	0.999533	0.57346	7.18302
GOTERM_MF_FAT	GO:0046914~transition metal ion binding	762	15.1041	0.00506177	Q8N4A0, Q8N1W1, Q9Y6I4, P60323, Q9R1V4, Q9PTJ3, Q7TSV3, B2RTY4, Q5RIV4, Q8BW72, Q8IVH2, Q922J3, Q6PAF4, Q9C040, Q6KAS7, Q02084, O09173, Q8BM47, Q8K4Q6, Q16822, Q7SYK1, Q5R8X1, Q2YDC9, P19382, P97762, Q6NX31, Q8C7U7, Q95N78, Q969V5, Q8WWI1, Q86WB0, Q8R2V5, O77819, Q5HZL1, P55198, Q8BP31, P20595, Q61097, P12890, Q5ZK62, Q8R0V5, P20417, Q68EI3, Q8R173, P67777, Q8NFT6, Q24K02, Q0V967, P47904, P39689,…	3355	2264	10694	1.07282	0.999854	0.586453	8.22498
GOTERM_MF_FAT	GO:0005083~small GTPase regulator activity	103	2.04163	0.00514108	P46940, Q8N1W1, O60890, Q5VT25, Q5RHR6, Q86UR5, Q9NZL6, Q96PX9, O97902, P19803, P11274, A5PF44, Q8BPM2, A2ASS6, Q8VHQ7, Q9HCH5, Q8R2V5, O54834, Q9ULL1, Q5ZK62, Q13009, Q9UJM3, Q8IW93, Q8VDV3, Q1LUA6, Q92608, Q5DU25, B5DFA1, Q9NU19, Q12851, Q14161, Q86VW2, Q9NZN5, P58802, O95819, Q8IYJ3, Q6ZR37, Q70Z35, Q9BZ29, O88387, P18754, Q3U0J8, Q96P47, Q5VST9, P50398, Q96P50, Q6ZSZ5, Q9BV36, P49025, Q9Z1A9,…	3355	262	10694	1.25309	0.999873	0.557504	8.34863
GOTERM_MF_FAT	GO:0016504~peptidase activator activity	11	0.218038	0.00520709	Q9BXK5, Q9Y239, P59046, Q29RY7, P53690, Q99683, P54274, P07589, P50281, P11276, Q9C000	3355	15	10694	2.33749	0.999887	0.530929	8.45143
GOTERM_MF_FAT	GO:0008092~cytoskeletal protein binding	174	3.44896	0.00528618	Q765P7, Q9UPN3, Q01082, Q8N3V7, O60890, Q29122, Q8IUG5, B2RTY4, Q9ULV4, Q7TNB2, Q3B7N2, Q6ZPF4, Q922J3, Q9Y4I1, P07737, Q96PY5, Q8WXH0, Q90738, Q76I76, O43586, Q3V6T2, O43312, A5PF48, Q8VHX6, O60504, P08037, Q9C0D6, P31146, Q4FZC9, Q8WWI1, O00560, Q5XIT1, Q64727, Q5DTJ9, Q9H0H5, Q6GLU8, Q28626, P61589, O95198, Q91Z83, O93510, P55002, Q5EAD0, Q28824, P46662, O95466, B5X5N3, Q61879, Q5RFN6, Q9UEY8,…	3355	469	10694	1.18256	0.999901	0.508066	8.57445
GOTERM_MF_FAT	GO:0004540~ribonuclease activity	22	0.436075	0.00888302	Q3SZ21, O75460, Q8NCE0, Q9BYK8, Q8R040, Q5BJI6, Q80UU2, Q9CSH3, Q9BSV6, Q29RY4, Q5RB79, O95453, Q8TCS8, Q9CR08, Q2TBT5, Q99315, Q2KIS2, Q7YRA3, Q6P0I8, Q96B26, Q99575, O75817	3355	42	10694	1.66963	1	0.6701	14.0079
GOTERM_MF_FAT	GO:0016564~transcription repressor activity	85	1.68484	0.0107104	Q8R409, P54254, Q60665, Q08117, P49918, Q60722, Q17QE2, Q9BQA5, Q7TSZ8, Q8IY57, Q8IVH2, P79832, Q8C8N2, Q15699, P97831, P56545, Q04724, Q06455, P39413, Q9R0G7, Q9Y2D1, O35780, P19382, Q9NR55, O35126, P15822, Q14582, O60284, Q9QXT8, Q9QYU4, Q91V33, P41970, Q7SYN5, Q8IMA8, Q6RVD7, P35638, O15164, O88282, Q9D6N5, Q8NB12, Q1WG82, Q8C208, Q8JI10, Q90ZE2, Q9WV70, Q53H80, Q61187, Q03014, O54946, Q8AVU4,…	3355	216	10694	1.25433	1	0.713238	16.6505
GOTERM_MF_FAT	GO:0046872~metal ion binding	1191	23.6075	0.011993	Q8N4A0, Q8N1W1, P60323, Q9Y6I4, Q9PTJ3, Q6DN14, Q8CI15, Q8BW72, Q8IVH2, Q6PAF4, Q9EQT3, Q8K4Q6, Q8BM47, Q32NH8, Q5R8X1, P22694, Q9UPZ9, Q1JPB9, P19382, P97762, Q8C7U7, Q95N78, Q969V5, Q66HT8, Q5HZL1, P22413, Q61097, Q68EI3, P20417, Q8NFT6, Q13349, P47904, Q5ZKY4, P27046, Q5XHB4, Q7TMI3, O75077, P27006, Q791N7, Q32LQ3, P22681, Q32LQ4, Q5RBP4, Q13643, Q8VHJ5, P13667, Q810A1, Q13444, P17785, B1AR13,…	3355	3628	10694	1.04639	1	0.730753	18.4596
GOTERM_MF_FAT	GO:0043169~cation binding	1201	23.8057	0.012023	Q8N4A0, Q8N1W1, P60323, Q9Y6I4, Q9PTJ3, Q6DN14, Q8CI15, Q8BW72, Q8IVH2, Q6PAF4, Q9EQT3, Q8K4Q6, Q8BM47, Q32NH8, Q5R8X1, P22694, Q9UPZ9, Q1JPB9, P19382, P97762, Q8C7U7, Q95N78, Q969V5, Q66HT8, Q5HZL1, P22413, Q61097, Q68EI3, P20417, Q8NFT6, Q13349, P47904, Q5ZKY4, P27046, Q5XHB4, Q7TMI3, O75077, P27006, Q791N7, Q32LQ3, P22681, Q32LQ4, Q5RBP4, Q13643, Q8VHJ5, P13667, Q810A1, Q13444, Q58D55, P17785,…	3355	3661	10694	1.04566	1	0.710051	18.5014
GOTERM_MF_FAT	GO:0043167~ion binding	1218	24.1427	0.0129219	Q8N4A0, Q8N1W1, P60323, Q9Y6I4, Q9PTJ3, Q6DN14, Q8CI15, Q8BW72, Q8IVH2, Q6PAF4, Q9XSA7, Q9EQT3, Q8K4Q6, Q8BM47, Q32NH8, Q5R8X1, P22694, Q9UPZ9, Q1JPB9, P19382, P97762, Q8C7U7, Q95N78, Q969V5, Q66HT8, Q5HZL1, P22413, Q61097, Q68EI3, P20417, Q8NFT6, Q13349, P47904, Q5ZKY4, P27046, Q5XHB4, Q7TMI3, O75077, P27006, Q791N7, Q32LQ3, P22681, Q32LQ4, Q5RBP4, Q13643, Q8VHJ5, P13667, Q810A1, Q13444, Q58D55,…	3355	3719	10694	1.04392	1	0.715566	19.7464
GOTERM_MF_FAT	GO:0004518~nuclease activity	52	1.03072	0.0131994	B0UXL7, Q8NCE0, Q5R7X9, Q9CSH3, Q9BSV6, Q13822, O95453, Q6AZB8, Q99315, Q2TBT5, Q01780, Q7YRA3, A2BHJ4, Q0IH86, Q8QHA5, O75817, O75460, Q5U1X1, Q9BYK8, Q5BJI6, Q8R040, Q9H2G2, Q80UU2, Q2TB18, Q7ZWC4, Q5HZL1, Q8BJW7, Q5RB79, P22413, P49184, O00115, Q9CR08, Q8C522, Q803U7, Q6P0I8, O08600, Q7TT28, Q29RY4, Q96MB7, Q8TCS8, Q17RS7, P07992, Q2KIS2, Q99575, Q3SZ21, Q2KID0, Q9NUW8, O43502, Q8WW01, Q8WTP8,…	3355	124	10694	1.33669	1	0.703834	20.1272
GOTERM_MF_FAT	GO:0004526~ribonuclease P activity	8	0.158573	0.0137398	Q3SZ21, Q9CR08, Q5BJI6, Q8R040, Q80UU2, Q99575, O75817, Q5RB79	3355	10	10694	2.54999	1	0.699903	20.8638
GOTERM_MF_FAT	GO:0008253~5'-nucleotidase activity	7	0.138751	0.014256	Q7SYN4, Q8VCE6, A3KFX0, Q5ZID6, P21589, O46411, Q9HBH5	3355	8	10694	2.78905	1	0.69569	21.5614
GOTERM_MF_FAT	GO:0016251~general RNA polymerase II transcription factor activity	21	0.416254	0.0146285	Q8VCS6, Q08C81, Q5SWW4, Q561X3, Q6DH26, Q7T3H7, Q8R0A0, Q05B56, Q9Y2W1, Q12962, Q6JPI3, O00268, Q9QYL7, Q6IQ63, Q16514, Q0VIA1, Q08BY1, P05552, Q6DBX1, P52657, Q7ZV35	3355	41	10694	1.63261	1	0.688242	22.0613
GOTERM_MF_FAT	GO:0008134~transcription factor binding	118	2.33895	0.0171032	P51531, Q9CPV5, Q92925, Q99814, Q08117, Q64318, Q60722, Q17QE2, Q8IZQ8, P84023, P51532, Q8C8N2, P56545, P61458, Q9JHN8, O60504, P49715, Q96JK9, Q9Y2D1, P10417, O57539, P61969, O35126, Q00577, O95905, P25963, Q9BYK8, P46937, P17844, Q6NVJ5, Q9QYU4, P41970, P20749, Q02446, Q5ZKY4, Q71QF9, Q9Y2W1, O88904, Q9DC22, Q9Z2V6, O00268, Q90888, P56524, O43439, Q03958, Q9Y2E4, P49116, O15209, Q8TAQ2, Q9NP71,…	3355	316	10694	1.19026	1	0.72885	25.3065
GOTERM_MF_FAT	GO:0016891~endoribonuclease activity, producing 5'-phosphomonoesters	13	0.257681	0.0200895	Q3SZ21, O75460, Q8R040, Q5BJI6, Q80UU2, Q5RB79, Q29RY4, Q9CR08, Q99315, Q2TBT5, Q2KIS2, Q99575, O75817	3355	22	10694	1.88351	1	0.770377	29.0535
GOTERM_MF_FAT	GO:0004521~endoribonuclease activity	15	0.297324	0.0211164	O75460, Q3SZ21, Q8NCE0, Q8R040, Q5BJI6, Q80UU2, Q9BSV6, Q5RB79, Q29RY4, Q9CR08, Q99315, Q2TBT5, Q2KIS2, Q99575, O75817	3355	27	10694	1.77082	1	0.773597	30.3006
GOTERM_MF_FAT	GO:0004879~ligand-dependent nuclear receptor activity	25	0.49554	0.0229016	P43135, Q03958, Q14995, P49116, Q801G2, Q95N78, P49843, Q06725, Q91392, P10588, Q1L673, Q8MIK0, O02747, O00482, Q7SYN5, P23204, Q04913, Q6DHP9, Q9YH32, Q96RI1, O42101, Q92753, P62510, P57781, P79386	3355	53	10694	1.50353	1	0.787851	32.4196
GOTERM_MF_FAT	GO:0008201~heparin binding	32	0.634291	0.0238451	P11602, P04114, P20908, P32261, Q62009, O94769, O15520, Q9UKZ9, P13595, Q90693, P51693, Q6UXX9, Q9Y5X9, P23359, P97857, Q06000, Q7T2H2, P21741, Q28178, Q12841, Q9W7C5, Q5M7L6, P11276, O88207, P07589, Q03350, Q8JHW2, P35440, Q15063, Q5R328, Q9UP79, A5A6L1	3355	72	10694	1.41666	1	0.788874	33.5148
GOTERM_MF_FAT	GO:0004386~helicase activity	51	1.0109	0.0245889	P51531, Q8VDW0, A2PYH4, Q9H5Z1, Q6DIC0, P51532, Q1LXK4, A4IG62, Q6DRI7, P16381, A2BGR3, Q0IIK5, Q8QHA5, Q9DG67, Q9CWX9, Q9BYK8, Q9H8H2, A4IHD2, Q9H6R0, P17844, Q6PGC1, Q8TDI0, Q9NVP1, Q8JHJ2, Q5ZJF6, P83571, Q9DEY9, Q8IY37, Q92698, P0C218, Q9Y2R4, B2ZFP3, Q9CWT6, Q8JFP1, Q2TBN3, Q9Y6V7, Q9BX63, Q501J6, Q8R0A0, Q9BXT6, Q96C10, Q7ZU90, Q9NY93, Q61655, Q03468, Q9NRZ9, Q7ZV90, Q96GQ7, Q9DBV3, Q9DBN9,…	3355	125	10694	1.30049	1	0.78714	34.3665
GOTERM_MF_FAT	GO:0003677~DNA binding	578	11.4569	0.0298205	Q8VBV4, Q8BW74, O54968, Q6B6N4, Q9PTJ3, Q8CI15, Q60722, Q9Z2U4, Q9I8V2, Q8BUR3, Q8IVH2, Q6KAS7, Q8K4Q6, Q02080, Q5R8X1, Q2YDC9, Q9GKQ9, A7E2Z2, P19382, Q62733, Q99020, Q8BKT3, Q9GZN2, P52435, Q6NX31, Q95N78, Q9DG67, O95983, P52432, Q9UFF9, Q02078, Q1LVW0, P41778, Q8CB77, Q8AXV6, Q90XW6, Q7TMI3, O54941, P22681, O54946, Q96K58, Q9DG12, Q7TST9, Q810A1, O15090, O95644, Q7ZY13, O42101, P57724, Q7TQ20,…	3355	1732	10694	1.06372	1	0.837398	40.073
GOTERM_MF_FAT	GO:0005088~Ras guanyl-nucleotide exchange factor activity	42	0.832507	0.0305507	Q8N1W1, Q92608, Q5R5M3, Q8IV61, Q8WZ42, Q12774, Q86VW2, Q9R0C8, Q9NZL6, Q9NZN5, Q96PX9, Q92565, P11274, Q6ZV73, Q91VS8, Q6ZR37, Q70Z35, Q08DN7, P0C6P5, Q9BZ29, O88387, A2ASS6, Q8CHT1, P18754, Q66T02, Q5VST9, Q58DL7, Q9ULL1, P52734, Q9Z206, Q13009, Q6ZSZ5, O15068, Q5R5T1, Q0P5E3, Q8VDV3, Q8IW93, Q12802, O15085, Q96DR7, Q6ZNL6, Q1LUA6	3355	101	10694	1.32549	1	0.83463	40.8313
GOTERM_MF_FAT	GO:0046983~protein dimerization activity	136	2.69574	0.0314053	O54968, Q8BW74, P04114, Q99814, Q6NZL8, P79145, Q64319, P84023, Q8IVH2, Q9UKT9, Q99683, Q63258, P33150, Q06455, Q3V6T2, P49716, P10417, P08037, P49715, Q9Y2D1, P31146, Q5SVZ6, P52435, O00560, P52432, P50572, Q9QYU4, P20595, Q99728, P22413, O08839, P67777, P56199, P41778, Q91Z83, Q24K02, Q9JJ73, Q0VCM0, P43432, P35790, Q9R1X4, P54274, O14920, Q9DG12, P35400, Q3SZZ2, O60675, Q5S007, P11835, P79386,…	3355	376	10694	1.15292	1	0.833211	41.7074
GOTERM_MF_FAT	GO:0008252~nucleotidase activity	7	0.138751	0.0314641	Q7SYN4, Q8VCE6, A3KFX0, Q5ZID6, P21589, O46411, Q9HBH5	3355	9	10694	2.47915	1	0.824191	41.7673
GOTERM_MF_FAT	GO:0015057~thrombin receptor activity	7	0.138751	0.0314641	Q58D85, Q5ZI82, A7YY44, P55086, Q920E0, P25116, O08675	3355	9	10694	2.47915	1	0.824191	41.7673
GOTERM_MF_FAT	GO:0008175~tRNA methyltransferase activity	7	0.138751	0.0314641	O14717, Q5XJ57, Q9NXH9, A4QP75, A4IGH4, Q1HFZ0, Q503J2	3355	9	10694	2.47915	1	0.824191	41.7673
GOTERM_MF_FAT	GO:0015220~choline transmembrane transporter activity	6	0.11893	0.0348464	Q9JMD7, Q8BGY9, Q8WWI5, P28570, Q9GZV3, O70577	3355	7	10694	2.73213	1	0.845897	45.1128
GOTERM_MF_FAT	GO:0005031~tumor necrosis factor receptor activity	5	0.099108	0.0362062	P19438, Q92956, Q9NS68, P22934, P20333	3355	5	10694	3.18748	1	0.848517	46.4062
GOTERM_MF_FAT	GO:0043120~tumor necrosis factor binding	5	0.099108	0.0362062	P19438, Q92956, Q9NS68, P22934, P20333	3355	5	10694	3.18748	1	0.848517	46.4062
GOTERM_MF_FAT	GO:0005089~Rho guanyl-nucleotide exchange factor activity	37	0.733399	0.0362682	Q8N1W1, Q92608, Q5R5M3, Q8WZ42, Q12774, Q86VW2, Q9R0C8, Q9NZN5, Q96PX9, Q6ZV73, P11274, Q91VS8, Q6ZR37, Q70Z35, Q08DN7, P0C6P5, Q9BZ29, O88387, A2ASS6, Q8CHT1, Q66T02, Q5VST9, Q58DL7, Q9ULL1, P52734, Q9Z206, Q13009, Q6ZSZ5, O15068, Q5R5T1, Q0P5E3, Q8IW93, Q12802, O15085, Q96DR7, Q6ZNL6, Q1LUA6	3355	88	10694	1.34019	1	0.840635	46.4645
GOTERM_MF_FAT	GO:0016893~endonuclease activity, active with either ribo- or deoxyribonucleic acids and producing 5'-phosphomonoesters	14	0.277502	0.0362905	Q3SZ21, O75460, Q5BJI6, Q8R040, Q80UU2, Q5RB79, Q29RY4, Q9CR08, Q2TBT5, Q99315, Q2KIS2, Q99575, Q8QHA5, O75817	3355	26	10694	1.71634	1	0.832481	46.4854
GOTERM_MF_FAT	GO:0003707~steroid hormone receptor activity	23	0.455897	0.0403958	P43135, Q14995, P49116, Q801G2, Q95N78, P49843, Q06725, Q91392, P10588, Q1L673, Q8MIK0, O00482, Q7SYN5, P23204, Q04913, Q6DHP9, Q9YH32, Q96RI1, O42101, Q92753, P62510, P57781, P79386	3355	50	10694	1.46624	1	0.856171	50.2132
GOTERM_MF_FAT	GO:0019955~cytokine binding	31	0.61447	0.0412308	Q9HBE5, Q80XF5, Q764M9, Q8MJS1, Q14627, O02671, Q8MJW8, P27930, Q04594, Q9UHF4, Q5XNR9, Q91513, Q9NRM6, P46094, Q95118, Q08334, Q9NS68, Q99062, P22934, O08842, Q04941, P19438, P04233, O95361, P40189, P32248, Q92956, Q9Z2B1, P20333, Q9ERS6, P43432	3355	72	10694	1.37239	1	0.854555	50.9408
GOTERM_MF_FAT	GO:0050840~extracellular matrix binding	13	0.257681	0.0435819	P19336, P14543, O46542, Q9JI33, Q28178, Q15582, Q61739, Q63258, Q9H4F8, Q9ESS6, P12107, A6QLD2, A5A6L1	3355	24	10694	1.72655	1	0.86304	52.9364

## Sheet: MTvsPMT
Category	Term	Count	%	PValue	Genes	List Total	Pop Hits	Pop Total	Fold Enrichment	Bonferroni	Benjamini	FDR
GOTERM_CC_FAT	GO:0005576~extracellular region	43	13.8264	5.3141e-05	P98089, Q29RY7, Q642G2, P98088, P01130, O95428, Q12904, Q98931, O42182, P08317, P20849, O54908, Q20FD0, Q8N436, Q9Y5X9, Q8JGW0, Q17RW2, O42175, Q61704, O35450, Q9YGD3, P41413, P82951, Q9WUW3, Q12846, P21741, Q96QV1, Q9D7Q1, Q28178, Q8K0C5, Q9UKU9, Q32L50, O08523, Q9Y661, A8E5C5, O19062, P12804, Q07936, Q12805, P12106, Q66S03, P83886, Q9UP79	182	1277	10116	1.87161	0.0117808	0.0117808	0.0677715
GOTERM_BP_FAT	GO:0003002~regionalization	13	4.18006	0.000418068	Q9QXN1, Q98UK5, P09084, Q96QV1, Q6T8D8, Q7TST9, Q9Z1J1, Q90268, P53544, Q90693, Q9I9E1, P41413, Q800Q5	207	205	11157	3.41796	0.421528	0.421528	0.681001
GOTERM_CC_FAT	GO:0044421~extracellular region part	25	8.03859	0.000550919	Q12846, Q9WUW3, Q642G2, Q29RY7, P98088, P01130, O95428, Q12904, Q98931, Q28178, O42182, Q9UKU9, P08317, O08523, P20849, Q9Y5X9, Q17RW2, O42175, Q07936, Q12805, O35450, P12106, Q9YGD3, P41413, Q9UP79	182	650	10116	2.13779	0.115638	0.0595948	0.700544
GOTERM_BP_FAT	GO:0007389~pattern specification process	15	4.82315	0.00055884	Q98UK5, Q9QXN1, Q642G2, P09084, Q96QV1, Q6T8D8, Q7TST9, Q9Z1J1, Q90268, P53544, Q90693, Q9I9E1, P41413, Q9I9P9, Q800Q5	207	274	11157	2.95065	0.518922	0.306402	0.909327
GOTERM_BP_FAT	GO:0009880~embryonic pattern specification	6	1.92926	0.00111224	Q98UK5, Q7TST9, Q9Z1J1, Q90268, Q800Q5, Q9I9P9	207	43	11157	7.52073	0.767004	0.384658	1.80215
GOTERM_BP_FAT	GO:0009952~anterior/posterior pattern formation	9	2.89389	0.00266762	Q98UK5, Q9QXN1, P09084, Q6T8D8, Q7TST9, Q9Z1J1, P41413, Q90268, Q800Q5	207	129	11157	3.76036	0.969699	0.582781	4.27123
GOTERM_MF_FAT	GO:0030246~carbohydrate binding	14	4.50161	0.00327836	P20693, P21741, Q9D7Q1, Q28178, Q8K0C5, P82808, Q32L50, Q90693, Q9Y5X9, Q8JGW0, P11217, Q66S03, P83886, Q9UP79	217	270	10694	2.55532	0.688305	0.688305	4.4008
GOTERM_CC_FAT	GO:0031143~pseudopodium	3	0.96463	0.00455505	O75112, O60662, Q8SQ24	182	6	10116	27.7912	0.638718	0.287778	5.65785
GOTERM_BP_FAT	GO:0015918~sterol transport	4	1.28617	0.00560878	Q9H172, Q9Y5X9, P01130, Q9H0X9	207	20	11157	10.7797	0.999365	0.770651	8.78166
GOTERM_BP_FAT	GO:0030301~cholesterol transport	4	1.28617	0.00560878	Q9H172, Q9Y5X9, P01130, Q9H0X9	207	20	11157	10.7797	0.999365	0.770651	8.78166
GOTERM_BP_FAT	GO:0035282~segmentation	6	1.92926	0.00688551	Q9QXN1, P09084, Q6T8D8, Q7TST9, Q9Z1J1, Q800Q5	207	65	11157	4.97525	0.999882	0.778512	10.6768
GOTERM_CC_FAT	GO:0005615~extracellular space	14	4.50161	0.00881703	Q9WUW3, Q642G2, Q29RY7, Q9Y5X9, P01130, Q12904, O42175, Q28178, Q98931, O35450, Q9UKU9, Q9YGD3, P08317, P41413	182	344	10116	2.26208	0.861227	0.389654	10.6831
GOTERM_BP_FAT	GO:0030539~male genitalia development	3	0.96463	0.0138478	Q7TST9, Q6JEL2, Q9D5V2	207	10	11157	16.1696	1	0.926292	20.3777
GOTERM_MF_FAT	GO:0001871~pattern binding	8	2.57235	0.0144426	Q90693, Q9Y5X9, Q8JGW0, P21741, Q9D7Q1, Q28178, Q32L50, Q9UP79	217	127	10694	3.10432	0.994284	0.924396	18.0768
GOTERM_MF_FAT	GO:0030247~polysaccharide binding	8	2.57235	0.0144426	Q90693, Q9Y5X9, Q8JGW0, P21741, Q9D7Q1, Q28178, Q32L50, Q9UP79	217	127	10694	3.10432	0.994284	0.924396	18.0768
GOTERM_MF_FAT	GO:0008201~heparin binding	6	1.92926	0.0150313	Q90693, Q9Y5X9, Q8JGW0, P21741, Q28178, Q9UP79	217	72	10694	4.10676	0.995377	0.833408	18.745
GOTERM_BP_FAT	GO:0006869~lipid transport	7	2.2508	0.0154942	Q5HZ92, Q9H172, Q9Y5X9, Q9GKI7, P01130, O42175, Q9H0X9	207	109	11157	3.46137	1	0.922315	22.5224
GOTERM_BP_FAT	GO:0048871~multicellular organismal homeostasis	5	1.60772	0.0184933	P12106, Q6JEL2, Q9YGD3, Q9D5V2, P20849	207	55	11157	4.89987	1	0.933791	26.2906
GOTERM_BP_FAT	GO:0048232~male gamete generation	8	2.57235	0.0185686	Q69CM7, A6QNK1, Q5ZIL4, Q99MH5, P49025, P59910, Q6JEL2, Q9D5V2	207	146	11157	2.95335	1	0.914006	26.3828
GOTERM_BP_FAT	GO:0007283~spermatogenesis	8	2.57235	0.0185686	Q69CM7, A6QNK1, Q5ZIL4, Q99MH5, P49025, P59910, Q6JEL2, Q9D5V2	207	146	11157	2.95335	1	0.914006	26.3828
GOTERM_MF_FAT	GO:0005509~calcium ion binding	29	9.32476	0.0189598	P62155, P01130, P82159, Q98931, O42182, P59747, P16230, Q8JGW0, Q29RU2, Q9ERC5, P07221, Q32NH8, Q9GZU1, O75366, Q6B3P0, Q5W0U4, Q28178, P82160, Q01841, Q9P2E7, O19062, Q8CDU5, Q07936, Q12805, O55070, Q6NYZ6, P02608	217	922	10694	1.55006	0.998881	0.817105	23.0759
GOTERM_BP_FAT	GO:0007286~spermatid development	4	1.28617	0.0190688	Q5ZIL4, Q99MH5, Q6JEL2, Q9D5V2	207	31	11157	6.95465	1	0.898845	26.9936
GOTERM_BP_FAT	GO:0010876~lipid localization	7	2.2508	0.0220334	Q5HZ92, Q9H172, Q9Y5X9, Q9GKI7, P01130, O42175, Q9H0X9	207	118	11157	3.19737	1	0.911994	30.5168
GOTERM_BP_FAT	GO:0009208~pyrimidine ribonucleoside triphosphate metabolic process	3	0.96463	0.0231471	Q99MH5, P52175, O00746	207	13	11157	12.4381	1	0.905404	31.7987
GOTERM_BP_FAT	GO:0006228~UTP biosynthetic process	3	0.96463	0.0231471	Q99MH5, P52175, O00746	207	13	11157	12.4381	1	0.905404	31.7987
GOTERM_BP_FAT	GO:0046051~UTP metabolic process	3	0.96463	0.0231471	Q99MH5, P52175, O00746	207	13	11157	12.4381	1	0.905404	31.7987
GOTERM_BP_FAT	GO:0009209~pyrimidine ribonucleoside triphosphate biosynthetic process	3	0.96463	0.0231471	Q99MH5, P52175, O00746	207	13	11157	12.4381	1	0.905404	31.7987
GOTERM_BP_FAT	GO:0006241~CTP biosynthetic process	3	0.96463	0.0231471	Q99MH5, P52175, O00746	207	13	11157	12.4381	1	0.905404	31.7987
GOTERM_BP_FAT	GO:0046036~CTP metabolic process	3	0.96463	0.0231471	Q99MH5, P52175, O00746	207	13	11157	12.4381	1	0.905404	31.7987
GOTERM_BP_FAT	GO:0048515~spermatid differentiation	4	1.28617	0.0243863	Q5ZIL4, Q99MH5, Q6JEL2, Q9D5V2	207	34	11157	6.34101	1	0.900578	33.1988
GOTERM_MF_FAT	GO:0016776~phosphotransferase activity, phosphate group as acceptor	4	1.28617	0.0262102	Q99MH5, P52175, O00746, Q502L7	217	32	10694	6.16014	0.99992	0.848285	30.5122
GOTERM_BP_FAT	GO:0006183~GTP biosynthetic process	3	0.96463	0.0266812	Q99MH5, P52175, O00746	207	14	11157	11.5497	1	0.90558	35.7208
GOTERM_BP_FAT	GO:0009148~pyrimidine nucleoside triphosphate biosynthetic process	3	0.96463	0.0266812	Q99MH5, P52175, O00746	207	14	11157	11.5497	1	0.90558	35.7208
GOTERM_MF_FAT	GO:0004550~nucleoside diphosphate kinase activity	3	0.96463	0.0273591	Q99MH5, P52175, O00746	217	13	10694	11.3726	0.999947	0.806273	31.6275
GOTERM_MF_FAT	GO:0005198~structural molecule activity	15	4.82315	0.0297376	P98088, Q6Q7P4, O60299, Q6P9V9, Q28178, P52948, P20849, O08523, Q14324, O35054, P21531, Q8JFQ6, Q8JGW0, Q17RW2, P12106	217	396	10694	1.86671	0.999978	0.783681	33.8837
GOTERM_BP_FAT	GO:0007589~body fluid secretion	3	0.96463	0.0304174	Q9EQZ1, Q07936, O15350	207	15	11157	10.7797	1	0.920114	39.6364
GOTERM_BP_FAT	GO:0009147~pyrimidine nucleoside triphosphate metabolic process	3	0.96463	0.0304174	Q99MH5, P52175, O00746	207	15	11157	10.7797	1	0.920114	39.6364
GOTERM_BP_FAT	GO:0048806~genitalia development	3	0.96463	0.0304174	Q7TST9, Q6JEL2, Q9D5V2	207	15	11157	10.7797	1	0.920114	39.6364
GOTERM_MF_FAT	GO:0051537~2 iron, 2 sulfur cluster binding	3	0.96463	0.0315008	Q17938, Q8K2P6, Q96NN9	217	14	10694	10.5602	0.999988	0.758368	35.5116
GOTERM_BP_FAT	GO:0007498~mesoderm development	5	1.60772	0.0334649	Q9QXN1, Q91765, Q6P0U3, Q7TST9, Q9Z1J1	207	66	11157	4.08322	1	0.927263	42.6633
GOTERM_BP_FAT	GO:0009220~pyrimidine ribonucleotide biosynthetic process	3	0.96463	0.0343472	Q99MH5, P52175, O00746	207	16	11157	10.106	1	0.921268	43.5126
GOTERM_BP_FAT	GO:0021766~hippocampus development	3	0.96463	0.0384622	Q9QXN1, Q98931, O15350	207	17	11157	9.51151	1	0.932939	47.3202
GOTERM_BP_FAT	GO:0009218~pyrimidine ribonucleotide metabolic process	3	0.96463	0.0384622	Q99MH5, P52175, O00746	207	17	11157	9.51151	1	0.932939	47.3202
GOTERM_CC_FAT	GO:0016529~sarcoplasmic reticulum	4	1.28617	0.0412347	P11217, A5A6S6, P07221, P16230	182	43	10116	5.17046	0.999916	0.847114	41.5612
GOTERM_BP_FAT	GO:0046039~GTP metabolic process	3	0.96463	0.0427543	Q99MH5, P52175, O00746	207	18	11157	8.98309	1	0.942723	51.0342
GOTERM_BP_FAT	GO:0046131~pyrimidine ribonucleoside metabolic process	3	0.96463	0.0427543	Q99MH5, P52175, O00746	207	18	11157	8.98309	1	0.942723	51.0342
GOTERM_BP_FAT	GO:0001894~tissue homeostasis	4	1.28617	0.0446168	P12106, Q6JEL2, Q9D5V2, P20849	207	43	11157	5.01382	1	0.941869	52.568
GOTERM_BP_FAT	GO:0048332~mesoderm morphogenesis	4	1.28617	0.0446168	Q9QXN1, Q91765, Q7TST9, Q9Z1J1	207	43	11157	5.01382	1	0.941869	52.568
GOTERM_MF_FAT	GO:0008034~lipoprotein binding	3	0.96463	0.045258	P01130, Q28178, Q98931	217	17	10694	8.69667	1	0.839078	46.9939
GOTERM_CC_FAT	GO:0016528~sarcoplasm	4	1.28617	0.0462129	P11217, A5A6S6, P07221, P16230	182	45	10116	4.94066	0.999974	0.827703	45.3161
GOTERM_BP_FAT	GO:0007155~cell adhesion	19	6.10932	0.0480221	Q9QXN1, Q6NW40, P98088, P59222, Q90Y50, Q8IYV9, Q6B3P0, Q12904, Q28178, Q05910, P20849, O08523, Q14324, O35054, Q8N436, Q8JGW0, Q17RW2, Q9P2E7, P12106	207	638	11157	1.60513	1	0.946507	55.2565
GOTERM_BP_FAT	GO:0022610~biological adhesion	19	6.10932	0.0480221	Q9QXN1, Q6NW40, P98088, P59222, Q90Y50, Q8IYV9, Q6B3P0, Q12904, Q28178, Q05910, P20849, O08523, Q14324, O35054, Q8N436, Q8JGW0, Q17RW2, Q9P2E7, P12106	207	638	11157	1.60513	1	0.946507	55.2565
